# Supplementary material
Source: PubMed Central journal article supplement (PMC4335811)
Supplement: ic502152r_si_001.pdf [file ic502152r_si_001.pdf]

# **Ligand-Sensitive but Not -Diagnostic: Evaluating Cr Valence-to-Core X-ray Emission Spectroscopy as a Probe of Inner-Sphere Coordination**

*Samantha N. MacMillan,<sup>†</sup> Richard C. Walroth,<sup>†</sup> Demetra M. Perry,<sup>†</sup> Thorbjørn J. Morsing,<sup>†,§</sup> and  
Kyle M. Lancaster<sup>\*†</sup>*

<sup>†</sup>Department of Chemistry and Chemical Biology, Baker Laboratory, Cornell University, Ithaca, NY 14853

<sup>§</sup>Department of Chemistry, University of Copenhagen, Universitetsparken 5, 2100 Copenhagen, Denmark

## **Supporting Information**

### **Table of Contents**

|                                                            |            |
|------------------------------------------------------------|------------|
| <b>Fitted Experimental Data and DFT Calculated Spectra</b> | <b>2</b>   |
| <b>Example Orca Input Files</b>                            | <b>13</b>  |
| <b>Geometry Optimized Coordinates</b>                      | <b>14</b>  |
| <b>References</b>                                          | <b>166</b> |

## Fitted Experimental Data and DFT Calculated Spectra

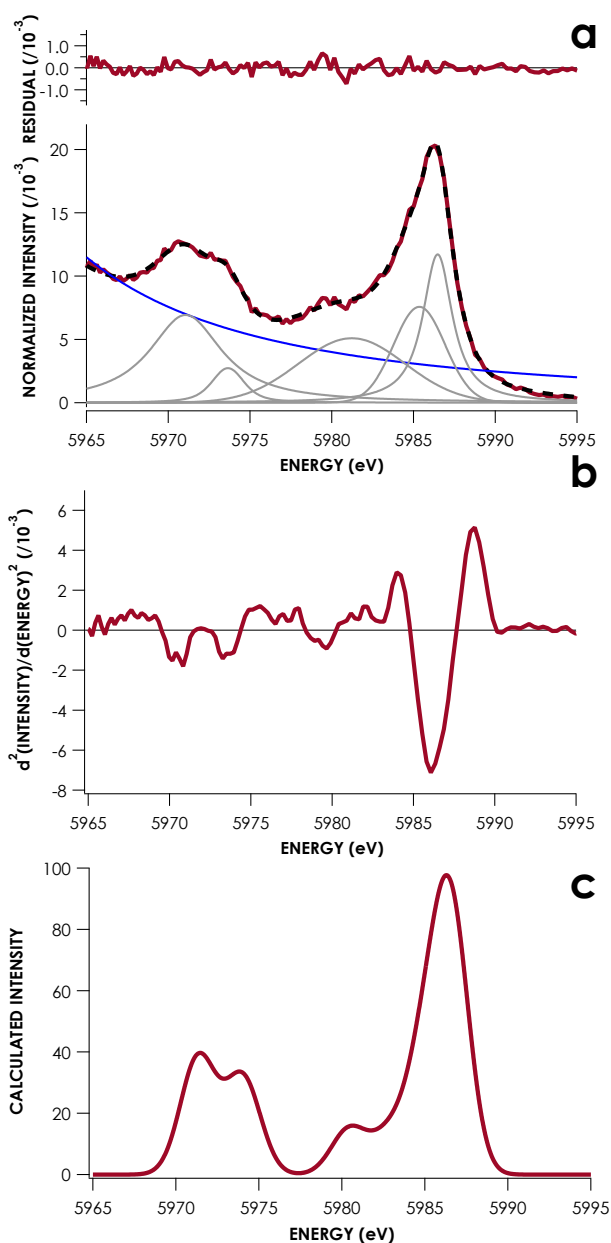

**Figure S1.** (a) Least-squares fit of pseudo-Voigt lineshapes to the V2C XES spectrum of  $\text{Cr}(\eta^6\text{-C}_6\text{H}_6)_2$ . Experimental data are red, fitted data are dashed black. Individual pseudo-Voigt peaks are gray, and the modeled K $\beta$  main line background is blue. (b) Savitsky-Golay smoothed second derivative V2C XES spectrum of  $\text{Cr}(\eta^6\text{-C}_6\text{H}_6)_2$ . (c) DFT-calculated V2C XES spectrum using the B3LYP functional with the energy domain empirically corrected as discussed in the text.

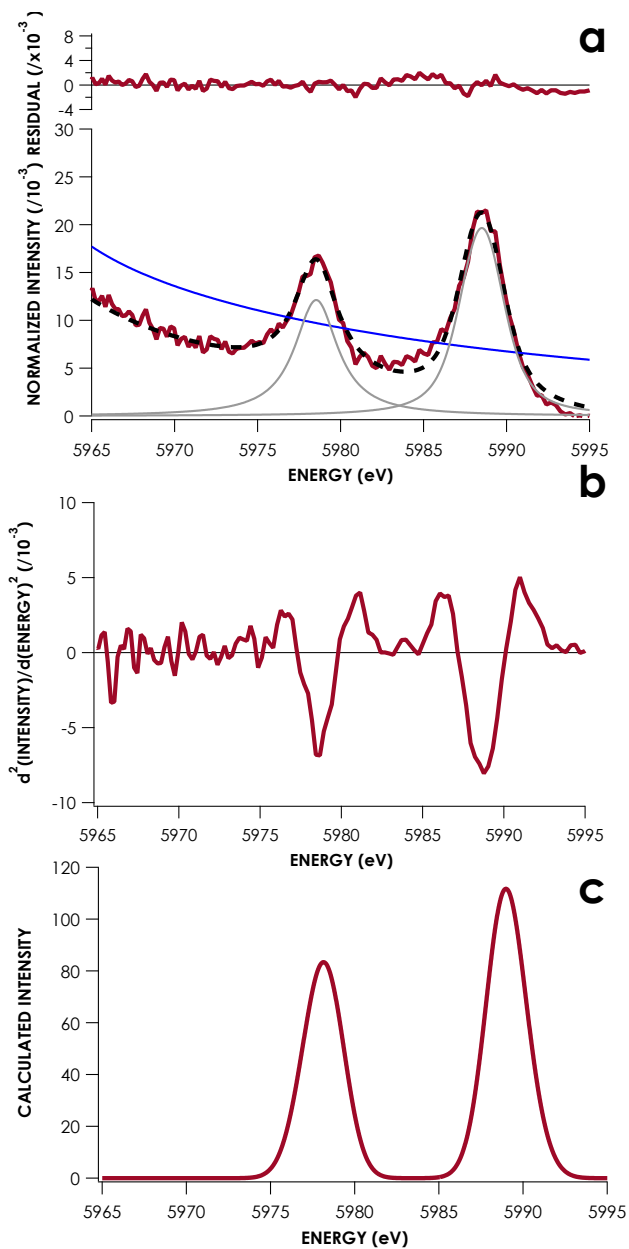

**Figure S2.** (a) Least-squares fit of pseudo-Voigt lineshapes to the V2C XES spectrum of  $(\text{NH}_4)_2[\text{CrNCl}_4]$ . Experimental data are red, fitted data are dashed black. Individual pseudo-Voigt peaks are gray, and the modeled  $\text{K}\beta$  main line background is blue. (b) Savitsky-Golay smoothed second derivative V2C XES spectrum of  $(\text{NH}_4)_2[\text{CrNCl}_4]$ . (c) DFT-calculated V2C XES spectrum using the B3LYP functional with the energy domain empirically corrected as discussed in the text.

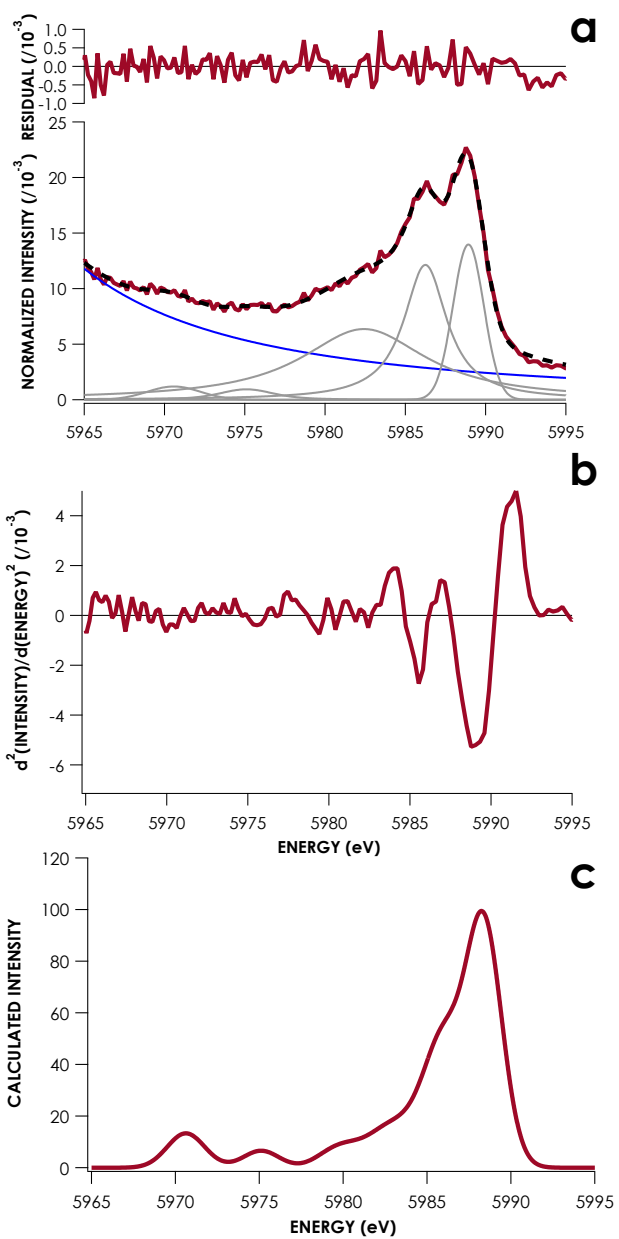

**Figure S3.** (a) Least-squares fit of pseudo-Voigt lineshapes to the V2C XES spectrum of  $[\text{Cr}(\text{bpy})_3](\text{PF}_6)_3$ . Experimental data are red, fitted data are dashed black. Individual pseudo-Voigt peaks are gray, and the modeled  $K\beta$  main line background is blue. (b) Savitsky-Golay smoothed second derivative V2C XES spectrum of  $[\text{Cr}(\text{bpy})_3](\text{PF}_6)_3$ . (c) DFT-calculated V2C XES spectrum using the B3LYP functional with the energy domain empirically corrected as discussed in the text.

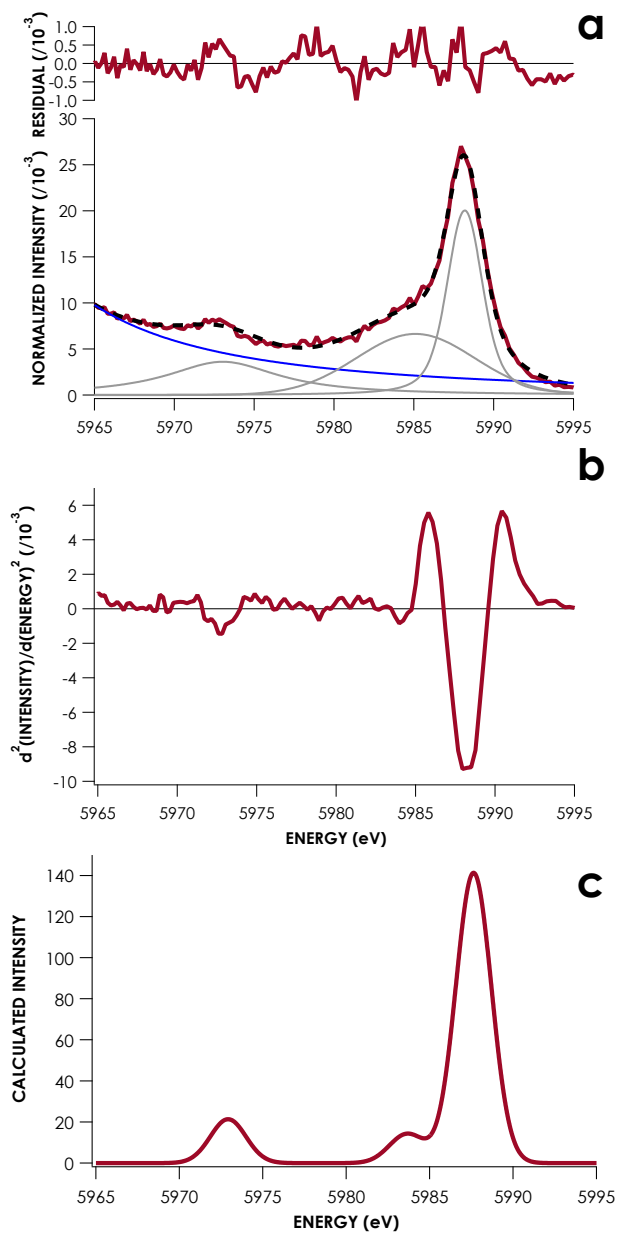

**Figure S4.** (a) Least-squares fit of pseudo-Voigt lineshapes to the V2C XES spectrum of  $[\text{Cr}(\text{NH}_3)_6](\text{NO}_3)_3$ . Experimental data are red, fitted data are dashed black. Individual pseudo-Voigt peaks are gray, and the modeled  $\text{K}\beta$  main line background is blue. (b) Savitsky-Golay smoothed second derivative V2C XES spectrum of  $[\text{Cr}(\text{NH}_3)_6](\text{NO}_3)_3$ . (c) DFT-calculated V2C XES spectrum using the B3LYP functional with the energy domain empirically corrected as discussed in the text.

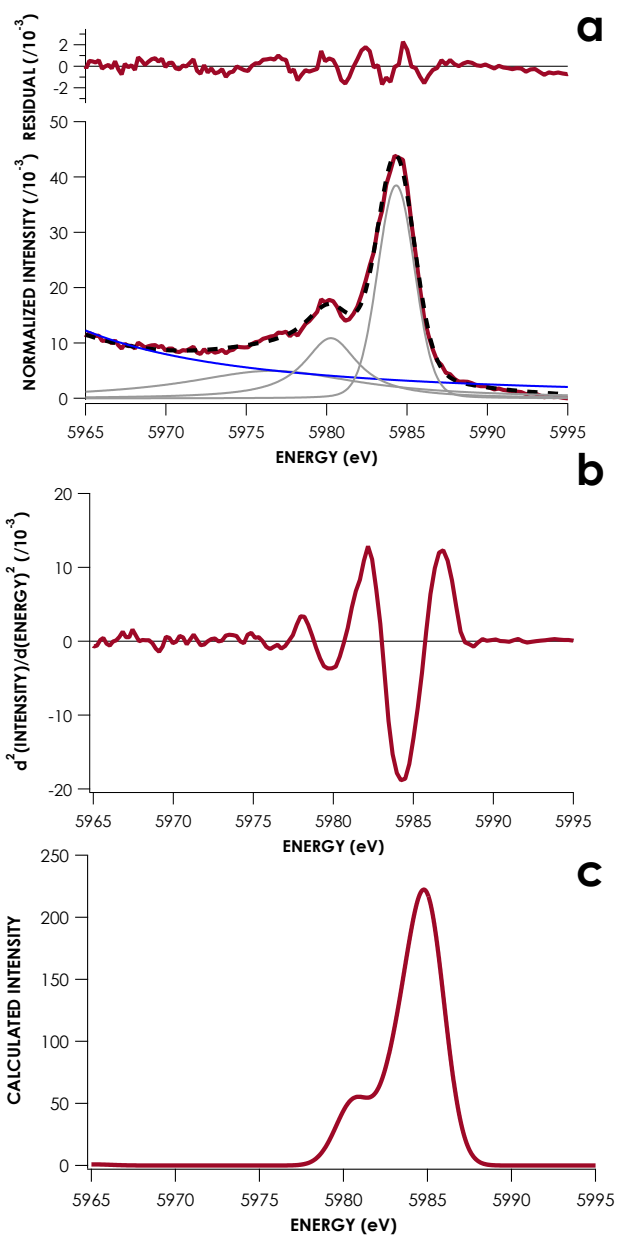

**Figure S5.** (a) Least-squares fit of pseudo-Voigt lineshapes to the V2C XES spectrum of  $\text{Cr}(\text{CO})_6$ . Experimental data are red, fitted data are dashed black. Individual pseudo-Voigt peaks are gray, and the modeled  $K\beta$  main line background is blue. (b) Savitsky-Golay smoothed second derivative V2C XES spectrum of  $\text{Cr}(\text{CO})_6$ . (c) DFT-calculated V2C XES spectrum using the B3LYP functional with the energy domain empirically corrected as discussed in the text.

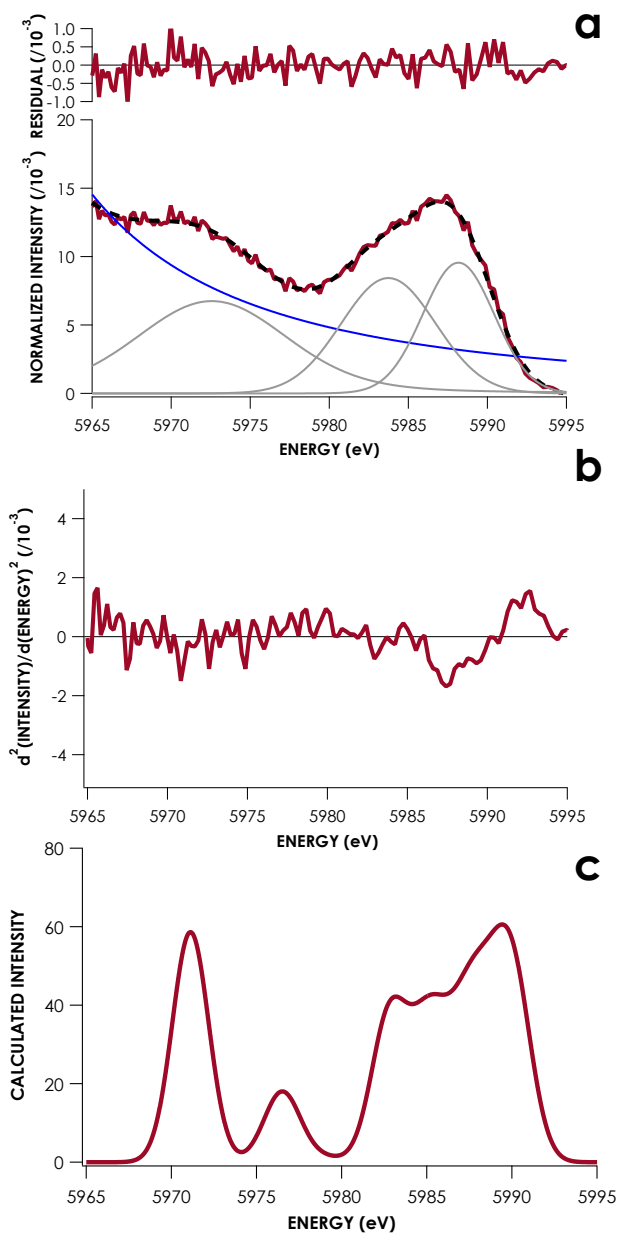

**Figure S6.** (a) Least-squares fit of pseudo-Voigt lineshapes to the V2C XES spectrum of  $\text{Cr}(\text{OtBu})_4$ . Experimental data are red, fitted data are dashed black. Individual pseudo-Voigt peaks are gray, and the modeled  $K\beta$  main line background is blue. (b) Savitsky-Golay smoothed second derivative V2C XES spectrum of  $\text{Cr}(\text{OtBu})_4$ . (c) DFT-calculated V2C XES spectrum using the B3LYP functional with the energy domain empirically corrected as discussed in the text.

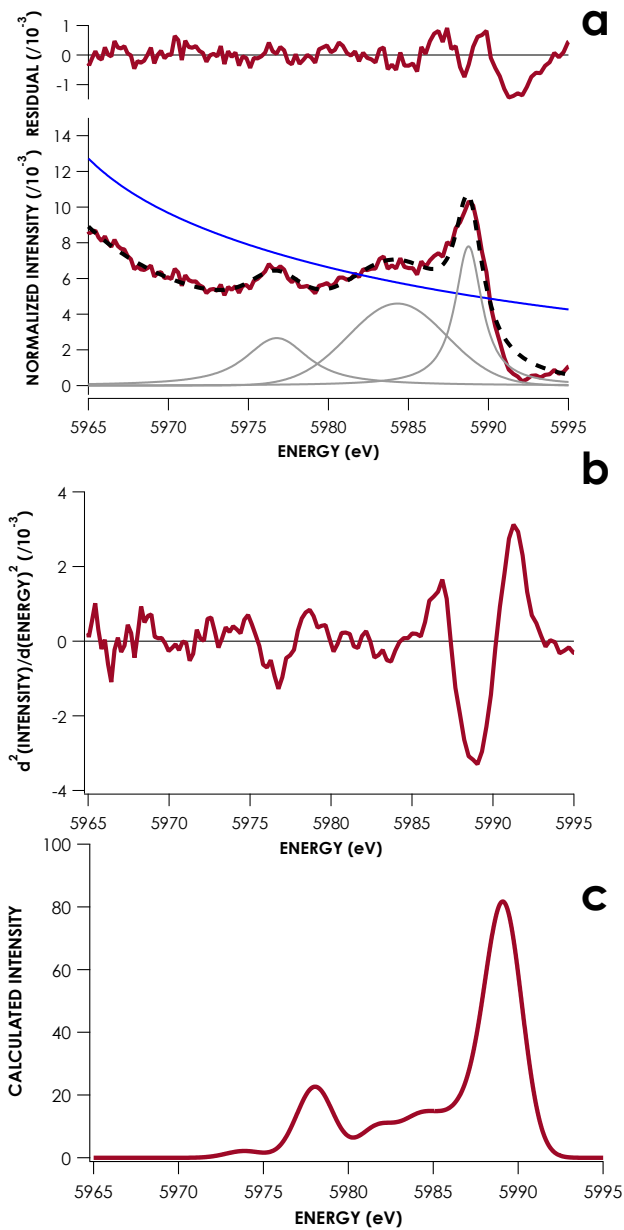

**Figure S7.** (a) Least-squares fit of pseudo-Voigt lineshapes to the V2C XES spectrum of  $\text{Np}_4\text{Cr}$ . Experimental data are red, fitted data are dashed black. Individual pseudo-Voigt peaks are gray, and the modeled  $K\beta$  main line background is blue. (b) Savitsky-Golay smoothed second derivative V2C XES spectrum of  $\text{Np}_4\text{Cr}$ . (c) DFT-calculated V2C XES spectrum using the B3LYP functional with the energy domain empirically corrected as discussed in the text.



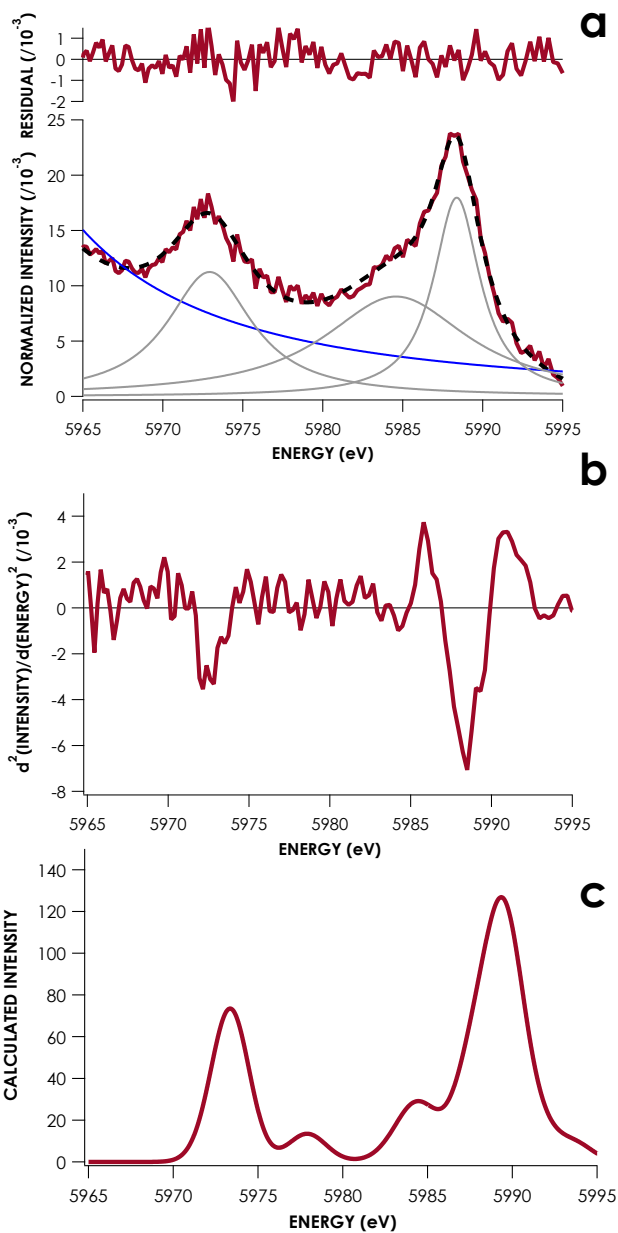

**Figure S8.** (a) Least-squares fit of pseudo-Voigt lineshapes to the V2C XES spectrum of (tpfc)CrO. Experimental data are red, fitted data are dashed black. Individual pseudo-Voigt peaks are gray, and the modeled K $\beta$  main line background is blue. (b) Savitsky-Golay smoothed second derivative V2C XES spectrum of (tpfc)CrO. (c) DFT-calculated V2C XES spectrum using the B3LYP functional with the energy domain empirically corrected as discussed in the text.

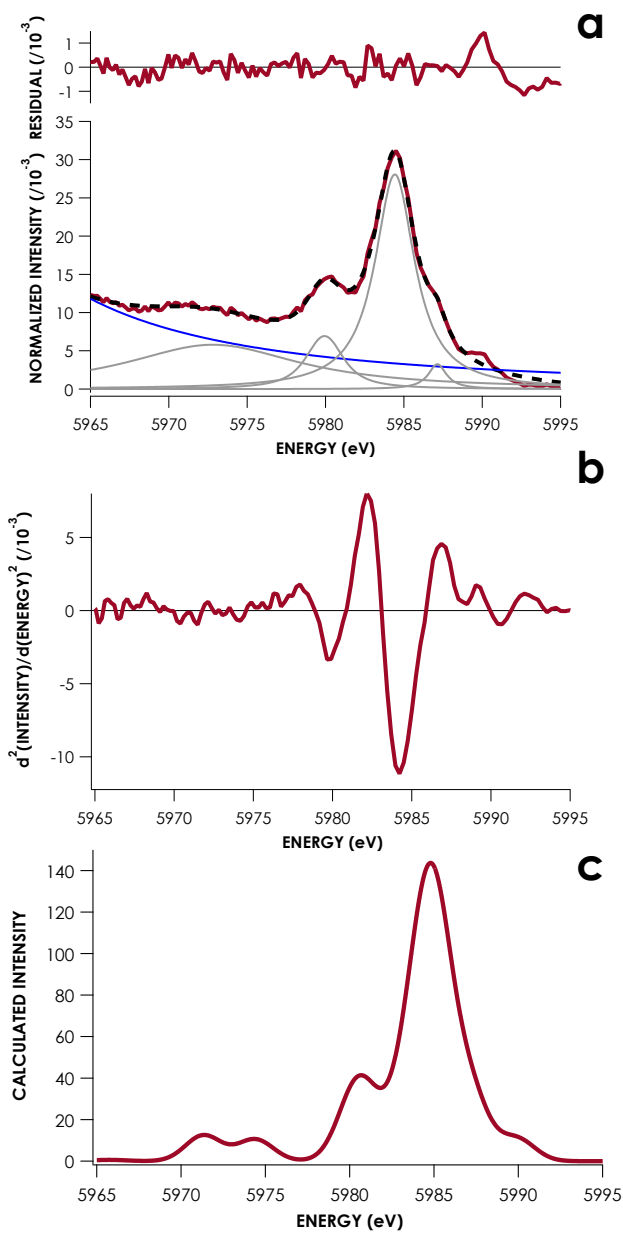

**Figure S9.** (a) Least-squares fit of pseudo-Voigt lineshapes to the V2C XES spectrum of  $\text{Cr}(\eta^6\text{-C}_6\text{H}_6)(\text{CO})_3$ . Experimental data are red, fitted data are dashed black. Individual pseudo-Voigt peaks are gray, and the modeled  $\text{K}\beta$  main line background is blue. (b) Savitsky-Golay smoothed second derivative V2C XES spectrum of  $\text{Cr}(\eta^6\text{-C}_6\text{H}_6)(\text{CO})_3$ . (c) DFT-calculated V2C XES spectrum using the B3LYP functional with the energy domain empirically corrected as discussed in the text.

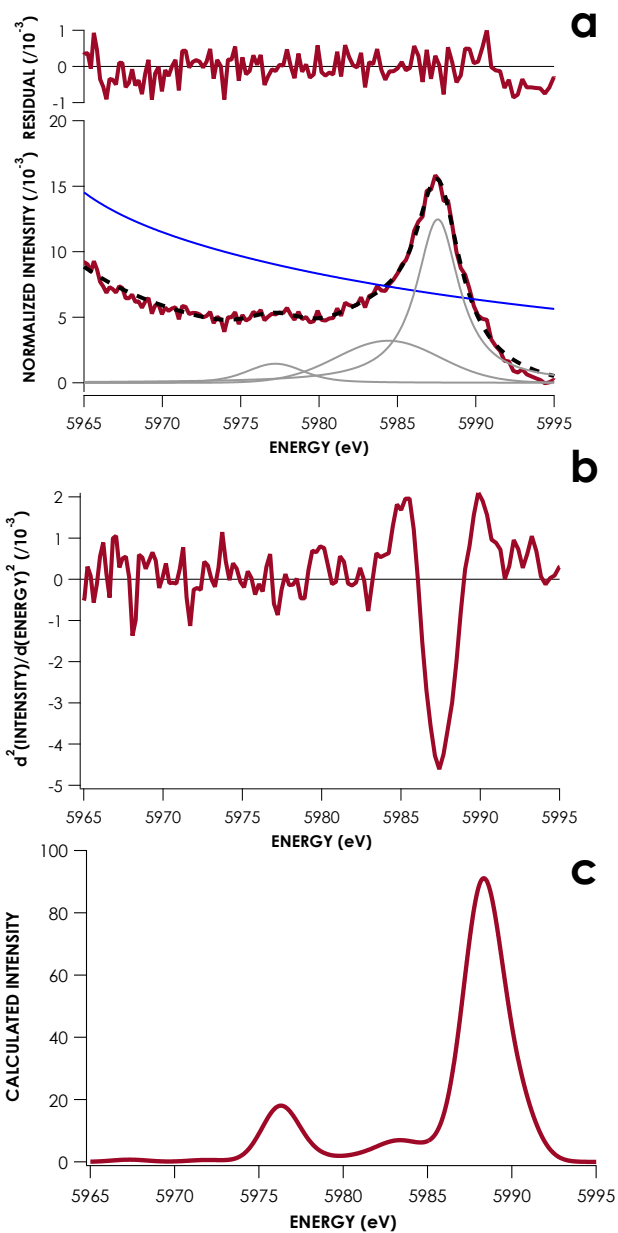

**Figure S10.** (a) Least-squares fit of pseudo-Voigt lineshapes to the V2C XES spectrum of  $(\text{PNP}^{\text{OMe}})\text{CrCl}_3$ . Experimental data are red, fitted data are dashed black. Individual pseudo-Voigt peaks are gray, and the modeled  $K\beta$  main line background is blue. (b) Savitsky-Golay smoothed second derivative V2C XES spectrum of  $(\text{PNP}^{\text{OMe}})\text{CrCl}_3$ . (c) DFT-calculated V2C XES spectrum using the B3LYP functional with the energy domain empirically corrected as discussed in the text.

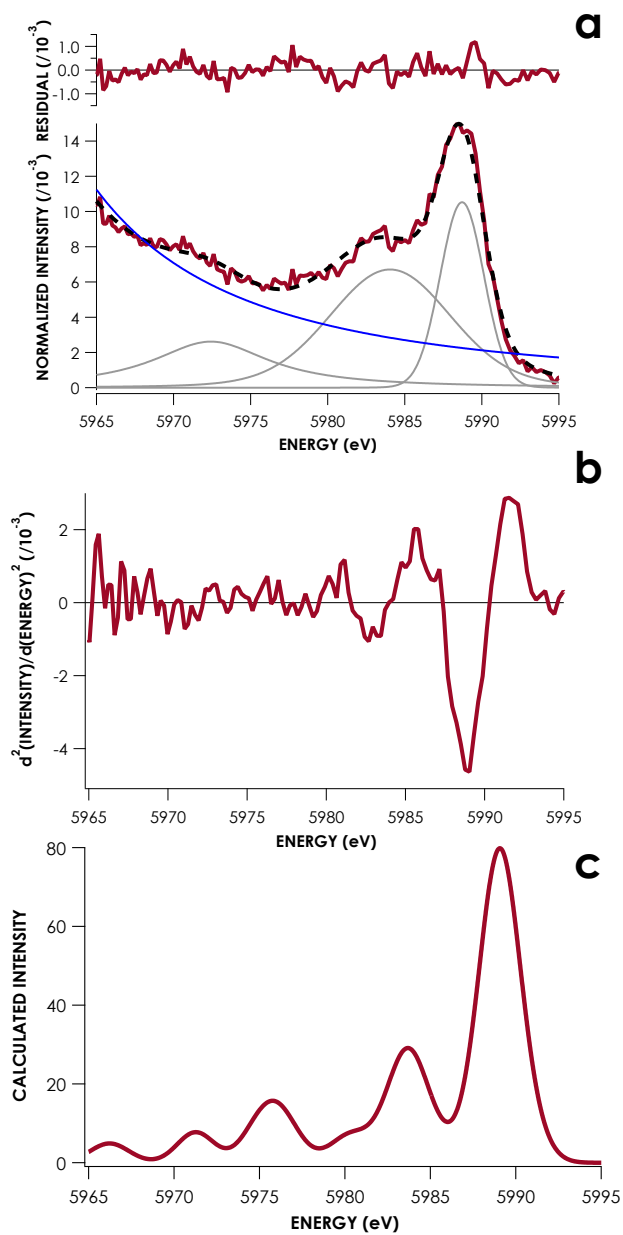

**Figure S11.** (a) Least-squares fit of pseudo-Voigt lineshapes to the V2C XES spectrum of  $\text{Cr}^{\text{III}}(14\text{-TMC}(\text{O}_2)(\text{Cl}))$ . Experimental data are red, fitted data are dashed black. Individual pseudo-Voigt peaks are gray, and the modeled  $K\beta$  main line background is blue. (b) Savitsky-Golay smoothed second derivative V2C XES spectrum of  $\text{Cr}^{\text{III}}(14\text{-TMC}(\text{O}_2)(\text{Cl}))$ . (c) DFT-calculated V2C XES spectrum using the B3LYP functional with the energy domain empirically corrected as discussed in the text.

## Example ORCA Input Files

### Geometry Optimization

```
! BP86 def2-TZVP(-f) def2-TZV/J TightSCF SlowConv COSMO(CH2Cl2)
! Grid4 NoFinalGrid Normalprint OPT ZORA
! PAL4
```

```
%maxcore 4000
```

```
%SCF Directresetfreq 1
  DIIS MaxEq 15
  end
  Shift Shift 0.5
  Erroff 0.1
  end
  MaxIter 500
  end
```

```
* xyz CHARGE SPIN_ MULTIPLICITY
COORDINATES
*
```

### Single Point + X-ray Emission Spectrum

```
!UKS BP86 def2-TZVP def2-TZVP/J COSMO
!ZORA TightSCF PAL4 Grid4 NoFinalGrid SP NormalPrint SCFConv7
```

```
%basis newgto Cr "CP(PPP)" end
  end
```

```
%method SpecialGridAtoms 24
  SpecialGridIntAcc 7
  end
```

```
%maxcore 4000
```

```
%xes CoreOrb ACCEPTOR ORBITAL (Cr 1s)
  OrbOp ACCEPTOR ORBITAL SPIN (Both alpha and beta = 0,1)
  end
```

```
* xyz CHARGE SPIN_ MULTIPLICITY
COORDINATES
*
```

## Geometry Optimized Coordinates

### Cp<sub>2</sub>Cr

Charge = 0

Spin Multiplicity = 3

|    |           |           |           |
|----|-----------|-----------|-----------|
| C  | 0.309962  | 1.222881  | -1.724656 |
| C  | 1.164023  | 0.056899  | -1.767425 |
| C  | 0.310264  | -1.102095 | -1.840825 |
| C  | -1.044760 | -0.653021 | -1.847959 |
| H  | 0.636621  | -2.138236 | -1.875688 |
| C  | -1.050276 | 0.768446  | -1.775287 |
| H  | 0.636001  | 2.258657  | -1.686005 |
| H  | 2.250363  | 0.055321  | -1.785378 |
| H  | -1.935805 | 1.397169  | -1.724973 |
| H  | -1.925454 | -1.290982 | -1.845371 |
| C  | -1.164235 | 0.007129  | 1.766043  |
| C  | -0.258801 | 1.129443  | 1.823698  |
| C  | 1.075813  | 0.617604  | 1.838779  |
| C  | 1.014783  | -0.802913 | 1.787283  |
| C  | -0.362493 | -1.194912 | 1.740607  |
| H  | -0.734229 | -2.215556 | 1.709743  |
| H  | -2.249438 | 0.056044  | 1.784813  |
| H  | -0.537946 | 2.179364  | 1.851479  |
| H  | 1.985518  | 1.213305  | 1.830696  |
| H  | 1.870240  | -1.472483 | 1.741224  |
| Cr | -0.000722 | 0.003206  | 0.000062  |

### Cr( $\eta^6$ -C<sub>6</sub>H<sub>6</sub>)<sub>2</sub>

Charge = 0

Spin Multiplicity = 1

|   |           |           |           |
|---|-----------|-----------|-----------|
| C | 0.848678  | 1.055556  | -1.672122 |
| C | -0.555837 | 1.277976  | -1.639000 |
| C | -1.449727 | 0.172848  | -1.582089 |
| C | -0.939322 | -1.154452 | -1.555370 |
| C | 0.465485  | -1.376202 | -1.587968 |
| C | 1.359749  | -0.271595 | -1.645478 |
| H | -1.622823 | -1.999997 | -1.458952 |
| H | -0.946079 | 2.296829  | -1.606712 |
| H | 2.437751  | -0.440501 | -1.617929 |
| C | 0.994308  | 1.111744  | 1.548475  |
| C | -0.396525 | 1.407962  | 1.577646  |
| C | -1.347782 | 0.352286  | 1.638564  |

|    |           |           |           |
|----|-----------|-----------|-----------|
| C  | -0.907486 | -0.999806 | 1.673742  |
| C  | 0.483458  | -1.296661 | 1.646622  |
| C  | 1.434198  | -0.240577 | 1.584224  |
| H  | 0.819162  | -2.334985 | 1.621924  |
| H  | -2.415309 | 0.577642  | 1.607315  |
| H  | 1.721858  | 1.919266  | 1.448579  |
| Cr | -0.000460 | -0.000204 | -0.000994 |
| H  | 1.535354  | 1.904033  | -1.663390 |
| H  | 0.857341  | -2.392520 | -1.516311 |
| H  | -2.524670 | 0.346197  | -1.504847 |
| H  | -0.735316 | 2.442510  | 1.497364  |
| H  | -1.636964 | -1.811862 | 1.669614  |
| H  | 2.499167  | -0.468717 | 1.511274  |

**(NH<sub>4</sub>)<sub>2</sub>[CrNCl<sub>4</sub>]**

Charge = 2

Spin Multiplicity = 2

|    |           |           |           |
|----|-----------|-----------|-----------|
| Cr | -0.000000 | -0.000139 | 0.088010  |
| N  | 0.000005  | -0.000100 | 1.621432  |
| Cl | 2.282650  | -0.000180 | -0.484622 |
| Cl | -2.282651 | -0.000184 | -0.484625 |
| Cl | -0.000004 | -2.282870 | -0.484525 |
| Cl | 0.000000  | 2.282473  | -0.484669 |

**[Cr(bpy)<sub>3</sub>](PF<sub>6</sub>)<sub>3</sub>**

Charge = 3

Spin Multiplicity = 4

|   |           |          |           |
|---|-----------|----------|-----------|
| N | 0.539617  | 0.598526 | -0.186982 |
| N | -1.084085 | 0.310625 | -2.239948 |
| C | 0.060594  | 1.763892 | -0.717956 |
| C | 1.394325  | 0.652378 | 0.857917  |
| C | 1.808013  | 1.855203 | 1.419039  |
| C | 1.323855  | 3.048516 | 0.883302  |
| C | 0.441618  | 3.000810 | -0.194373 |
| C | -0.860993 | 1.602280 | -1.851247 |
| C | -1.917200 | 0.068931 | -3.275753 |
| C | -2.559772 | 1.089412 | -3.967421 |
| C | -1.479303 | 2.667005 | -2.509523 |
| C | -2.337355 | 2.409869 | -3.577031 |
| H | 1.628049  | 4.009028 | 1.298297  |
| H | 2.498214  | 1.843890 | 2.260886  |

|   |           |           |           |
|---|-----------|-----------|-----------|
| H | 0.054658  | 3.922642  | -0.623766 |
| H | 1.748789  | -0.297704 | 1.252548  |
| H | -1.294492 | 3.691392  | -2.192716 |
| H | -2.825047 | 3.233921  | -4.097044 |
| H | -3.220581 | 0.840770  | -4.796114 |
| H | -2.064642 | -0.972107 | -3.555740 |
| N | 1.597765  | -1.139679 | -2.282189 |
| N | 1.082232  | -2.403485 | -0.030576 |
| C | 2.615603  | -1.918493 | -1.806042 |
| C | 1.782898  | -0.438590 | -3.422163 |
| C | 2.975162  | -0.480202 | -4.136055 |
| C | 4.018490  | -1.272083 | -3.656573 |
| C | 3.835396  | -1.997285 | -2.480787 |
| C | 2.319242  | -2.642199 | -0.561941 |
| C | 0.724988  | -3.028112 | 1.112929  |
| C | 1.572343  | -3.908968 | 1.775623  |
| C | 3.211008  | -3.518032 | 0.060037  |
| C | 2.835513  | -4.158457 | 1.239304  |
| H | 4.966790  | -1.326896 | -4.190510 |
| H | 3.072381  | 0.102721  | -5.050372 |
| H | 4.639320  | -2.619305 | -2.092567 |
| H | 0.947388  | 0.166136  | -3.768770 |
| H | 4.192545  | -3.701980 | -0.372015 |
| H | 3.524137  | -4.844360 | 1.731942  |
| H | 1.236472  | -4.385663 | 2.694946  |
| H | -0.266262 | -2.808238 | 1.504307  |
| N | -1.788901 | -1.357725 | 0.049963  |
| N | -0.996173 | -2.730608 | -2.053459 |
| C | -2.621244 | -2.373793 | -0.330037 |
| C | -2.126463 | -0.591835 | 1.110462  |
| C | -3.294347 | -0.798636 | 1.835922  |
| C | -4.148840 | -1.832745 | 1.454089  |
| C | -3.807366 | -2.627099 | 0.361321  |
| C | -2.168513 | -3.152790 | -1.490912 |
| C | -0.503416 | -3.391186 | -3.124120 |
| C | -1.147301 | -4.490150 | -3.681264 |
| C | -2.858564 | -4.250490 | -2.009022 |
| C | -2.344196 | -4.926846 | -3.113560 |
| H | -5.072624 | -2.022221 | 2.000029  |
| H | -3.519168 | -0.153618 | 2.683622  |
| H | -4.462555 | -3.438280 | 0.050522  |
| H | -1.435362 | 0.203310  | 1.382631  |
| H | -3.790963 | -4.578617 | -1.554177 |
| H | -2.874699 | -5.785336 | -3.524556 |
| H | -0.708149 | -4.986892 | -4.544764 |
| H | 0.429915  | -3.020958 | -3.543335 |



Cr -0.108551 -1.120194 -1.122198

**[Cr(NH<sub>3</sub>)<sub>6</sub>](NO<sub>3</sub>)<sub>3</sub>**

Charge = 3

Spin Multiplicity = 4

|    |          |          |          |
|----|----------|----------|----------|
| N  | 0.02057  | -0.02103 | -2.00858 |
| H  | 0.74111  | -0.69931 | -2.34250 |
| H  | 0.25923  | 0.91791  | -2.39742 |
| H  | -0.89427 | -0.32733 | -2.40582 |
| N  | 0.00979  | 2.00874  | -0.01948 |
| H  | 0.96106  | 2.38409  | -0.22909 |
| H  | -0.64187 | 2.35360  | -0.75915 |
| H  | -0.31809 | 2.40943  | 0.88635  |
| N  | 0.00000  | -0.00000 | 2.00880  |
| H  | 0.32060  | 0.91259  | 2.39987  |
| H  | -0.94754 | -0.21567 | 2.39015  |
| H  | 0.66011  | -0.73051 | 2.35717  |
| N  | 2.00870  | -0.01106 | 0.02178  |
| H  | 2.35441  | 0.71745  | 0.68547  |
| H  | 2.40131  | 0.20174  | -0.92180 |
| H  | 2.39109  | -0.92573 | 0.34690  |
| N  | -0.03044 | -2.00863 | -0.00109 |
| H  | -0.26005 | -2.38693 | 0.94439  |
| H  | -0.75973 | -2.34616 | -0.66811 |
| H  | 0.87909  | -2.41315 | -0.31360 |
| N  | -2.00861 | 0.03193  | -0.00142 |
| H  | -2.34737 | 0.69857  | 0.72765  |
| H  | -2.40577 | -0.90903 | 0.21440  |
| H  | -2.39311 | 0.35818  | -0.91482 |
| Cr | 0.00000  | 0.00000  | 0.00000  |

**Cr(CO)<sub>6</sub>**

Charge = 0

Spin Multiplicity = 1

|   |           |           |           |
|---|-----------|-----------|-----------|
| O | -3.057642 | 0.000092  | 0.000108  |
| C | -1.903776 | -0.000166 | 0.000157  |
| O | 0.000634  | -3.057786 | -0.001431 |
| C | 0.000345  | -1.903920 | -0.000706 |
| O | -0.000829 | 3.057642  | 0.001155  |
| C | -0.000297 | 1.903774  | 0.000646  |
| O | 0.000642  | -0.000507 | 3.057717  |
| C | 0.000341  | -0.000525 | 1.903850  |

|    |           |           |           |
|----|-----------|-----------|-----------|
| O  | 3.057787  | 0.000086  | 0.000158  |
| C  | 1.903920  | 0.000101  | -0.000091 |
| O  | -0.000791 | 0.000705  | -3.057711 |
| C  | -0.000280 | 0.000470  | -1.903845 |
| Cr | 0.000067  | -0.000067 | 0.000003  |

**Cr(O<sup>*t*</sup>Bu)<sub>4</sub>**

Charge = 0

Spin Multiplicity = 3

|   |           |           |            |
|---|-----------|-----------|------------|
| O | -6.111430 | -0.846778 | -6.955099  |
| C | -6.528860 | 0.364397  | -7.643209  |
| C | -6.339895 | 0.144965  | -9.149666  |
| C | -5.712526 | 1.570165  | -7.162070  |
| C | -8.012710 | 0.546079  | -7.298962  |
| H | -5.282598 | -0.053256 | -9.372871  |
| H | -6.660002 | 1.034252  | -9.712824  |
| H | -6.937782 | -0.713662 | -9.487136  |
| H | -6.055390 | 2.485786  | -7.665760  |
| H | -5.825781 | 1.708012  | -6.077977  |
| H | -4.645230 | 1.432906  | -7.387443  |
| H | -8.588084 | -0.337325 | -7.609808  |
| H | -8.421006 | 1.426887  | -7.815993  |
| H | -8.142966 | 0.685504  | -6.216442  |
| O | -3.452901 | -1.206614 | -7.917022  |
| C | -2.014002 | -1.343052 | -8.077735  |
| C | -1.360247 | -0.026369 | -7.638594  |
| C | -1.484535 | -2.518256 | -7.246807  |
| C | -1.784424 | -1.594682 | -9.573498  |
| H | -1.590737 | 0.176039  | -6.583692  |
| H | -1.737240 | 0.807502  | -8.247788  |
| H | -0.267797 | -0.078104 | -7.758501  |
| H | -1.658524 | -2.346751 | -6.174964  |
| H | -0.402691 | -2.637662 | -7.405078  |
| H | -1.982554 | -3.453737 | -7.536795  |
| H | -0.708219 | -1.669175 | -9.788245  |
| H | -2.201168 | -0.769973 | -10.168689 |
| H | -2.267976 | -2.531021 | -9.885906  |
| O | -4.713964 | -3.070939 | -5.855422  |
| C | -5.438632 | -4.200872 | -6.414443  |
| C | -5.282665 | -4.245108 | -7.939396  |
| C | -6.914925 | -4.058036 | -6.022197  |
| C | -4.820728 | -5.449629 | -5.772495  |
| H | -4.222467 | -4.313113 | -8.219475  |
| H | -5.709409 | -3.342696 | -8.400270  |

|    |           |           |           |
|----|-----------|-----------|-----------|
| H  | -5.806624 | -5.121004 | -8.349184 |
| H  | -7.017906 | -4.037425 | -4.927882 |
| H  | -7.501523 | -4.904059 | -6.410366 |
| H  | -7.326229 | -3.125421 | -6.432205 |
| H  | -3.758862 | -5.536668 | -6.042815 |
| H  | -5.343409 | -6.354973 | -6.114610 |
| H  | -4.899728 | -5.395666 | -4.677534 |
| O  | -3.665545 | -0.523363 | -5.163521 |
| C  | -3.947700 | -0.455568 | -3.738722 |
| C  | -5.459944 | -0.434715 | -3.484363 |
| C  | -3.300735 | 0.846351  | -3.248645 |
| C  | -3.300073 | -1.674088 | -3.068035 |
| H  | -5.927691 | 0.419473  | -3.992921 |
| H  | -5.661764 | -0.349533 | -2.406549 |
| H  | -5.928743 | -1.359447 | -3.849987 |
| H  | -3.758717 | 1.714499  | -3.743303 |
| H  | -2.224106 | 0.845021  | -3.469888 |
| H  | -3.432238 | 0.954209  | -2.161923 |
| H  | -3.476695 | -1.656843 | -1.982188 |
| H  | -3.722651 | -2.600745 | -3.479950 |
| H  | -2.214788 | -1.673540 | -3.243266 |
| Cr | -4.487433 | -1.411983 | -6.475482 |

### **Np<sub>4</sub>Cr**

Charge = 0

Spin Multiplicity = 3

|    |          |           |           |
|----|----------|-----------|-----------|
| Cr | 5.785179 | 2.022917  | 11.173250 |
| C  | 4.341590 | 1.239885  | 10.009535 |
| H  | 3.444076 | 1.319989  | 10.652003 |
| H  | 4.277616 | 2.069884  | 9.275085  |
| C  | 4.326439 | -0.115995 | 9.267862  |
| C  | 4.036039 | -1.265930 | 10.249778 |
| H  | 3.070998 | -1.112648 | 10.757292 |
| H  | 4.813616 | -1.349131 | 11.022269 |
| H  | 3.987921 | -2.228073 | 9.716267  |
| C  | 3.191229 | -0.080529 | 8.216931  |
| H  | 2.219082 | 0.114148  | 8.695053  |
| H  | 3.122011 | -1.042122 | 7.682507  |
| H  | 3.368226 | 0.710931  | 7.472674  |
| C  | 5.656219 | -0.382136 | 8.538736  |
| H  | 5.893059 | 0.431379  | 7.836381  |
| H  | 5.602223 | -1.319186 | 7.962385  |
| H  | 6.493447 | -0.472652 | 9.246987  |
| C  | 4.959459 | 3.564364  | 12.160630 |

|   |          |           |           |
|---|----------|-----------|-----------|
| C | 3.864001 | 3.608749  | 13.249680 |
| C | 2.592729 | 2.861020  | 12.809986 |
| C | 3.496287 | 5.091656  | 13.498013 |
| C | 4.370968 | 3.009148  | 14.573026 |
| C | 7.284177 | 2.740712  | 10.042710 |
| H | 8.079848 | 2.855781  | 10.806780 |
| H | 7.519627 | 1.812049  | 9.480630  |
| C | 7.322065 | 3.956911  | 9.089373  |
| C | 6.163573 | 3.927778  | 8.076558  |
| H | 6.153926 | 2.984925  | 7.508846  |
| H | 6.260963 | 4.754151  | 7.355057  |
| H | 5.188830 | 4.033969  | 8.575549  |
| C | 7.272899 | 5.274215  | 9.884469  |
| H | 8.100335 | 5.328070  | 10.608953 |
| H | 6.329870 | 5.377419  | 10.439290 |
| H | 7.361360 | 6.137745  | 9.206820  |
| C | 8.656333 | 3.911147  | 8.306657  |
| H | 8.727328 | 2.993919  | 7.702282  |
| H | 9.515999 | 3.932517  | 8.993715  |
| H | 8.740888 | 4.775037  | 7.627401  |
| C | 6.522711 | 0.597114  | 12.379330 |
| H | 5.655154 | 0.511928  | 13.069004 |
| H | 6.491930 | -0.299056 | 11.728322 |
| C | 7.844729 | 0.597917  | 13.181322 |
| C | 8.079903 | 1.942209  | 13.894915 |
| H | 7.246561 | 2.184653  | 14.569726 |
| H | 8.182331 | 2.767852  | 13.174700 |
| H | 9.002271 | 1.905389  | 14.495977 |
| C | 9.032767 | 0.296760  | 12.249042 |
| H | 8.904642 | -0.678370 | 11.753849 |
| H | 9.974359 | 0.265298  | 12.819139 |
| H | 9.138917 | 1.061594  | 11.466712 |
| C | 7.770896 | -0.518661 | 14.249074 |
| H | 7.598573 | -1.499693 | 13.780699 |
| H | 6.949810 | -0.331498 | 14.957930 |
| H | 8.710643 | -0.574469 | 14.822495 |
| H | 5.868733 | 4.083815  | 12.526843 |
| H | 4.613735 | 4.128767  | 11.267027 |
| H | 4.378288 | 5.667846  | 13.816610 |
| H | 2.729442 | 5.177010  | 14.285125 |
| H | 3.098948 | 5.557217  | 12.583117 |
| H | 5.267674 | 3.538791  | 14.928997 |
| H | 4.625749 | 1.945285  | 14.462250 |
| H | 3.598775 | 3.090961  | 15.353936 |
| H | 2.224445 | 3.233229  | 11.841576 |
| H | 1.790139 | 2.998167  | 13.551569 |

H 2.775728 1.780769 12.713283

**(tpfc)CrO**

Charge = 0

Spin Multiplicity = 2

|    |           |           |           |
|----|-----------|-----------|-----------|
| Cr | 0.721957  | 3.335475  | -0.279416 |
| F  | -2.264414 | 8.110980  | 0.887891  |
| F  | -2.391222 | 10.807721 | 1.102685  |
| F  | -0.220413 | 12.343730 | 0.445596  |
| F  | 2.089831  | 11.151696 | -0.416534 |
| F  | 2.240723  | 8.454883  | -0.610036 |
| F  | 2.270909  | 3.741095  | -5.244510 |
| F  | 2.107993  | 3.799573  | -7.951171 |
| F  | -0.302304 | 3.405225  | -9.190485 |
| F  | -2.555741 | 2.964874  | -7.697311 |
| F  | -2.408191 | 2.923624  | -4.990052 |
| F  | 2.246890  | -1.791739 | -0.582078 |
| F  | 2.091400  | -4.486892 | -0.374113 |
| F  | -0.222289 | -5.670842 | 0.490618  |
| F  | -2.392221 | -4.127569 | 1.134487  |
| F  | -2.261597 | -1.433021 | 0.902898  |
| N  | 0.157407  | 4.552116  | 1.122960  |
| N  | 0.129303  | 4.736678  | -1.502373 |
| N  | 0.118519  | 1.930510  | -1.493995 |
| N  | 0.168964  | 2.120833  | 1.129806  |
| C  | 0.080166  | 4.042729  | 2.407830  |
| C  | -0.001395 | 6.290697  | 2.574557  |
| C  | 0.092718  | 5.929012  | 1.192277  |
| C  | 0.069031  | 6.704828  | 0.025849  |
| C  | 0.062753  | 6.113280  | -1.248993 |
| C  | -0.073013 | 6.797265  | -2.498335 |
| H  | -0.172879 | 7.872782  | -2.611065 |
| C  | -0.090198 | 5.856205  | -3.497833 |
| H  | -0.196442 | 6.033394  | -4.563803 |
| C  | 0.035849  | 4.569799  | -2.884522 |
| C  | 0.022501  | 3.328281  | -3.535751 |
| C  | 0.044489  | 2.090245  | -2.879371 |
| C  | -0.045077 | 0.799407  | -3.489436 |
| H  | -0.119603 | 0.616265  | -4.557116 |
| C  | -0.034078 | -0.137102 | -2.485870 |
| H  | -0.112768 | -1.214608 | -2.596318 |
| C  | 0.070957  | 0.553234  | -1.236894 |
| C  | 0.074369  | -0.034394 | 0.039686  |
| C  | 0.096311  | 0.745183  | 1.203737  |

|   |           |           |           |
|---|-----------|-----------|-----------|
| C | -0.004618 | 0.389337  | 2.587151  |
| H | -0.074599 | -0.624322 | 2.971600  |
| C | -0.017751 | 1.561371  | 3.332260  |
| H | -0.105344 | 1.650424  | 4.411241  |
| C | 0.083721  | 2.636241  | 2.411504  |
| C | -0.005631 | 8.187935  | 0.136101  |
| C | -1.169118 | 8.834290  | 0.575038  |
| C | -1.254244 | 10.222177 | 0.684584  |
| C | -0.151360 | 11.006835 | 0.346554  |
| C | 1.023370  | 10.397328 | -0.095458 |
| C | 1.082518  | 9.007237  | -0.193158 |
| C | -0.063291 | 3.331846  | -5.027388 |
| C | 1.067395  | 3.552373  | -5.823716 |
| C | 1.001913  | 3.581373  | -7.217005 |
| C | -0.224938 | 3.380268  | -7.850576 |
| C | -1.371343 | 3.153655  | -7.087855 |
| C | -1.277303 | 3.132776  | -5.696110 |
| C | -0.001153 | -1.517062 | 0.156283  |
| C | 1.086633  | -2.339847 | -0.165085 |
| C | 1.025283  | -3.729292 | -0.059361 |
| C | -0.151190 | -4.334658 | 0.383663  |
| C | -1.253632 | -3.546400 | 0.714629  |
| C | -1.166514 | -2.159396 | 0.596364  |
| C | -0.014968 | 5.121797  | 3.324382  |
| H | -0.066593 | 7.306156  | 2.955015  |
| H | -0.098126 | 5.037399  | 4.404066  |
| O | 2.293427  | 3.335942  | -0.348420 |

**Cr( $\eta^6$ -C<sub>6</sub>H<sub>6</sub>)(CO)<sub>3</sub>**

Charge = 0

Spin Multiplicity = 1

|    |           |           |          |
|----|-----------|-----------|----------|
| C  | 1.258639  | 0.964488  | 1.797169 |
| C  | -0.094649 | 1.348299  | 1.874382 |
| C  | -1.116169 | 0.355613  | 1.902898 |
| C  | -0.773285 | -1.009829 | 1.852793 |
| C  | 0.595562  | -1.398017 | 1.774822 |
| C  | 1.605634  | -0.416550 | 1.746760 |
| H  | 0.857309  | -2.452036 | 1.700749 |
| H  | -2.162721 | 0.654157  | 1.927701 |
| H  | 2.037557  | 1.722734  | 1.739842 |
| Cr | 0.158537  | 0.014303  | 0.091815 |
| H  | -0.362663 | 2.403331  | 1.877686 |
| H  | -1.554360 | -1.767887 | 1.838539 |
| H  | 2.649269  | -0.710864 | 1.651307 |

|   |           |           |           |
|---|-----------|-----------|-----------|
| C | -0.303532 | -1.375635 | -1.004104 |
| C | 1.528188  | 0.398355  | -1.058619 |
| C | -0.913232 | 1.094063  | -0.922907 |
| O | -0.601352 | -2.262355 | -1.709400 |
| O | 2.400983  | 0.646776  | -1.799604 |
| O | -1.596137 | 1.784031  | -1.578789 |

**(PNP<sup>OMe</sup>)CrCl<sub>3</sub>**

Charge = 0

Spin Multiplicity = 4

|    |            |           |           |
|----|------------|-----------|-----------|
| Cr | -5.369237  | -1.472526 | -3.141832 |
| C  | -6.734499  | 2.195053  | 0.110627  |
| C  | -7.912874  | 2.898579  | 0.397652  |
| C  | -6.771458  | 1.086618  | -0.771192 |
| C  | -9.124378  | 2.499102  | -0.173861 |
| C  | -8.003064  | 0.709593  | -1.331589 |
| C  | -9.178194  | 1.402387  | -1.033475 |
| H  | -7.892559  | 3.753554  | 1.071067  |
| H  | -10.031331 | 3.058136  | 0.062513  |
| H  | -10.122380 | 1.089525  | -1.479441 |
| H  | -8.030812  | -0.139472 | -2.015204 |
| P  | -5.362381  | 0.031592  | -1.256925 |
| C  | -3.969201  | -3.111432 | 0.919004  |
| C  | -4.792790  | -1.510567 | 2.551717  |
| C  | -5.150116  | -0.648067 | 1.514060  |
| C  | -4.329660  | -2.243619 | -0.116623 |
| C  | -4.200597  | -2.736401 | 2.246278  |
| C  | -4.914971  | -0.992504 | 0.176576  |
| H  | -3.521184  | -4.079947 | 0.711746  |
| H  | -3.919015  | -3.424463 | 3.044513  |
| H  | -5.617803  | 0.308952  | 1.740945  |
| H  | -4.981280  | -1.228340 | 3.587677  |
| O  | -5.521796  | 2.512091  | 0.648784  |
| C  | -5.450023  | 3.631330  | 1.551878  |
| O  | -4.133105  | -2.561171 | -1.457795 |
| C  | -6.007450  | 4.123035  | -3.277329 |
| H  | -5.246949  | 4.451511  | -5.611658 |
| H  | 0.107752   | -2.995740 | -3.517640 |
| H  | 1.933284   | -1.285685 | -3.496262 |
| O  | -5.124601  | 2.992025  | -3.337468 |
| C  | -0.128574  | -1.933193 | -3.458652 |
| C  | -4.650878  | 3.542022  | -5.661120 |
| C  | 0.887461   | -0.976944 | -3.452592 |
| C  | -4.526144  | 2.717146  | -4.531466 |

|    |           |           |           |
|----|-----------|-----------|-----------|
| C  | -1.458660 | -1.512312 | -3.404022 |
| H  | -4.132654 | 3.855756  | -7.725513 |
| C  | -4.018379 | 3.202063  | -6.859071 |
| H  | -2.261221 | -2.247295 | -3.455099 |
| C  | 0.583830  | 0.385668  | -3.400786 |
| H  | 1.391531  | 1.115452  | -3.403143 |
| C  | -1.798899 | -0.152939 | -3.336603 |
| C  | -0.752874 | 0.810208  | -3.345695 |
| C  | -3.735248 | 1.546256  | -4.605859 |
| C  | -3.251461 | 2.039577  | -6.949597 |
| P  | -3.582703 | 0.275533  | -3.295682 |
| C  | -3.119589 | 1.224727  | -5.824380 |
| O  | -1.119142 | 2.119710  | -3.295705 |
| C  | -0.086002 | 3.119487  | -3.354444 |
| H  | -2.760766 | 1.765654  | -7.883880 |
| N  | -3.933703 | 0.860425  | -1.719148 |
| C  | -3.107232 | 1.757640  | -0.902077 |
| H  | -2.048357 | 1.551980  | -1.094495 |
| H  | -3.312225 | 1.570365  | 0.157138  |
| H  | -3.321775 | 2.809646  | -1.133223 |
| H  | -2.524286 | 0.312484  | -5.895916 |
| Cl | -6.665635 | -0.191091 | -4.469598 |
| Cl | -4.543027 | -2.828810 | -4.834442 |
| Cl | -7.091724 | -2.825974 | -2.391189 |
| H  | -6.425962 | 4.111752  | -2.265745 |
| H  | -6.821033 | 4.030477  | -4.012196 |
| H  | -5.461782 | 5.065131  | -3.441369 |
| C  | -3.709233 | -3.931652 | -1.726829 |
| H  | -3.694395 | -4.022219 | -2.815954 |
| H  | -4.437015 | -4.633441 | -1.300942 |
| H  | -2.708801 | -4.095629 | -1.307629 |
| H  | -4.399379 | 3.696168  | 1.852369  |
| H  | -6.079455 | 3.464157  | 2.438349  |
| H  | -5.749927 | 4.562773  | 1.049670  |
| H  | -0.610866 | 4.079616  | -3.330744 |
| H  | 0.491377  | 3.035224  | -4.286895 |
| H  | 0.588453  | 3.043574  | -2.488346 |

**Cr(14-TMC)(O<sub>2</sub>)(Cl)**

Charge = 1

Spin Multiplicity = 1

|    |           |           |          |
|----|-----------|-----------|----------|
| Cr | -3.002459 | -0.632836 | 0.521661 |
| C  | -2.939294 | -3.222246 | 2.163918 |
| C  | -1.412254 | -3.186029 | 2.081816 |



|   |           |           |           |
|---|-----------|-----------|-----------|
| H | -3.247334 | -3.759828 | 3.076157  |
| H | -3.339953 | -3.774530 | 1.305435  |
| N | -3.608650 | -1.874395 | 2.192551  |
| H | -1.065212 | -4.203250 | 2.319879  |
| H | -0.980716 | -2.543897 | 2.863645  |
| C | -0.846460 | -2.848726 | 0.701706  |
| H | -1.380234 | -3.428579 | -0.061140 |
| H | 0.216938  | -3.137504 | 0.655714  |
| N | -0.940184 | -1.398519 | 0.316888  |
| C | 0.129145  | -0.654540 | 1.042110  |
| C | -0.715067 | -1.275004 | -1.164394 |
| H | 0.348960  | -1.451687 | -1.394633 |
| C | -1.105371 | 0.103421  | -1.667321 |
| H | -1.300878 | -2.057098 | -1.656913 |
| H | -0.422862 | 0.855419  | -1.253546 |
| N | -2.504507 | 0.531583  | -1.282476 |
| H | -1.000121 | 0.143564  | -2.763150 |
| C | -2.461951 | 2.023412  | -1.215241 |
| C | -3.499087 | 0.132770  | -2.342521 |
| H | -3.235998 | 0.678321  | -3.265330 |
| C | -4.966694 | 0.442989  | -2.007754 |
| H | -3.366648 | -0.936070 | -2.540533 |
| H | -5.119728 | 1.529754  | -1.946933 |
| C | -5.637192 | -0.259338 | -0.816325 |
| H | -5.542405 | 0.130021  | -2.893096 |
| N | -5.061200 | 0.073226  | 0.536626  |
| H | -5.596772 | -1.348498 | -0.936329 |
| H | -6.700745 | 0.035312  | -0.801261 |
| C | -5.351254 | 1.506634  | 0.841070  |
| C | -5.745898 | -0.724231 | 1.624232  |
| C | -3.434651 | -1.297750 | 3.557636  |
| C | -5.073806 | -2.054371 | 1.907399  |
| H | -6.798873 | -0.891468 | 1.347567  |
| H | -5.745432 | -0.097005 | 2.523785  |
| H | -5.563925 | -2.535007 | 2.770370  |
| H | -5.161868 | -2.721790 | 1.041678  |
| H | 0.109340  | 0.405109  | 0.776819  |
| H | 1.109438  | -1.086802 | 0.783162  |
| H | -0.030223 | -0.728530 | 2.121722  |
| H | -3.924853 | -0.324244 | 3.630447  |
| H | -2.372082 | -1.152025 | 3.771596  |
| H | -3.868907 | -1.992082 | 4.295042  |
| H | -3.454898 | 2.436102  | -1.027367 |
| H | -2.096453 | 2.417425  | -2.177396 |
| H | -1.797907 | 2.333789  | -0.404210 |
| H | -4.948991 | 2.161396  | 0.066072  |

|    |           |           |           |
|----|-----------|-----------|-----------|
| H  | -4.895298 | 1.778639  | 1.796353  |
| H  | -6.443263 | 1.647777  | 0.887259  |
| O  | -3.304502 | -2.090210 | -0.603998 |
| O  | -4.277470 | -2.972125 | -0.819288 |
| Cl | -2.312825 | 1.131429  | 1.907589  |

**Cr(NH<sub>3</sub>)<sub>5</sub>F<sup>2+</sup>**

Charge = 2

Spin Multiplicity = 4

|    |                   |                   |                   |
|----|-------------------|-------------------|-------------------|
| Cr | 0.74118146661262  | 0.08364303918359  | 0.04725868899772  |
| N  | 0.42249485452371  | 2.16267458976049  | 0.04245746693107  |
| H  | 1.34902746403788  | 2.60304199075659  | -0.00251400913367 |
| H  | -0.03797564004979 | 2.54981688376349  | 0.87285670687141  |
| H  | -0.10586861540561 | 2.52676759609711  | -0.75727120048221 |
| N  | 0.90397524184209  | 0.09986735315892  | 2.14331695156440  |
| H  | 1.90576965357372  | 0.12907361116063  | 2.36658018034184  |
| H  | 0.48891561442709  | 0.91515232679931  | 2.60625880102682  |
| H  | 0.52120355075747  | -0.71621976558744 | 2.63199510521327  |
| F  | 2.55869284299547  | 0.40313057012878  | -0.06059768260481 |
| N  | 1.15993251533410  | -1.97781161005293 | 0.03736490625325  |
| H  | 0.94729637806880  | -2.47738103488875 | 0.90723158999462  |
| H  | 0.71673094834710  | -2.52341440840465 | -0.70918246138790 |
| H  | 2.17325397030157  | -2.06948672900388 | -0.10093841287583 |
| N  | 0.67352569945985  | 0.06685327111115  | -2.05561892775122 |
| H  | 1.63469503006874  | 0.22192111165007  | -2.38202315045595 |
| H  | 0.36433719331293  | -0.81164634684834 | -2.48454170708904 |
| H  | 0.10415173913219  | 0.80054341578124  | -2.49028072118536 |
| N  | -1.34078462719318 | -0.28071807267530 | 0.18193794698317  |
| H  | -1.56792679281034 | -1.19284881594899 | 0.59299188269674  |
| H  | -1.83837408088973 | 0.40775304434119  | 0.75707446009639  |
| H  | -1.81549440644669 | -0.26875202028229 | -0.72754641400474 |

**Cr(NH<sub>3</sub>)<sub>5</sub>Cl<sup>2+</sup>**

Charge = 2

Spin Multiplicity = 4

|    |                   |                   |                   |
|----|-------------------|-------------------|-------------------|
| Cr | 0.76347871744668  | 0.10084634393916  | 0.05259048380341  |
| N  | 0.31053234886958  | 2.15697084941670  | 0.04653848555858  |
| H  | 1.17629780907339  | 2.67819769625598  | -0.13462130976803 |
| H  | -0.05549629060028 | 2.51810922302614  | 0.93428696080316  |
| H  | -0.36222222077168 | 2.45615550983560  | -0.66765700927834 |
| N  | 0.88377625678064  | 0.09781731295018  | 2.15222615032631  |
| H  | 1.68770209938149  | -0.46121695590985 | 2.45899845308667  |

|    |                   |                   |                   |
|----|-------------------|-------------------|-------------------|
| H  | 1.05853247639815  | 1.03560379777759  | 2.52980518964822  |
| H  | 0.06774738519946  | -0.26308470463045 | 2.65867296146328  |
| Cl | 3.01058632280593  | 0.58084380024237  | -0.04096287613047 |
| N  | 1.18310084434448  | -1.96113414891644 | 0.03142371179211  |
| H  | 0.99492860499963  | -2.44608196581838 | 0.91564414824556  |
| H  | 0.68873713545725  | -2.49801053937406 | -0.68939704844461 |
| H  | 2.18518611243713  | -2.08827831917519 | -0.15219355675141 |
| N  | 0.67971435301997  | 0.06775218063510  | -2.05122150324737 |
| H  | 1.64333726894937  | 0.04569791475243  | -2.40492489108297 |
| H  | 0.20081395713223  | -0.73867138631925 | -2.46666925658514 |
| H  | 0.24786537742657  | 0.89563179431258  | -2.47562685908563 |
| N  | -1.30365391669907 | -0.32160512169559 | 0.16442705372321  |
| H  | -1.51104808928958 | -1.24946710561064 | 0.55057270960559  |
| H  | -1.81873685583684 | 0.34267292290621  | 0.75296847028124  |
| H  | -1.77242969652452 | -0.29680909860018 | -0.74809046796337 |

### Cr(NH<sub>3</sub>)<sub>5</sub>Br<sup>2+</sup>

Charge = 2

Spin Multiplicity = 4

|    |                   |                   |                   |
|----|-------------------|-------------------|-------------------|
| Cr | 0.75945544757051  | 0.10368400062999  | 0.04913281926185  |
| N  | 0.26100880348577  | 2.14873847591009  | 0.05292315831482  |
| H  | 1.10433605728844  | 2.70050672901809  | -0.14378073812992 |
| H  | -0.09631012544112 | 2.49474617010853  | 0.95022555670728  |
| H  | -0.43683974487073 | 2.42725842170242  | -0.64569857723851 |
| N  | 0.88664291899572  | 0.11348944458146  | 2.14831985961736  |
| H  | 1.55017338410801  | -0.59403603039117 | 2.48258282436790  |
| H  | 1.26091124802568  | 1.00444691548940  | 2.49304005373106  |
| H  | 0.01297226600399  | -0.05034617432620 | 2.66072468182716  |
| Br | 3.15533151517656  | 0.66149019283849  | -0.05956475293592 |
| N  | 1.20255527382885  | -1.95378390762564 | 0.02566692935779  |
| H  | 0.91200809204966  | -2.46759316666775 | 0.86483385626684  |
| H  | 0.79975875088408  | -2.46730160651828 | -0.76584806066367 |
| H  | 2.21965619518493  | -2.07587746929291 | -0.04416976608845 |
| N  | 0.67805948833879  | 0.06901866450625  | -2.05331318184145 |
| H  | 1.59403909567661  | -0.21242704804680 | -2.42136738055990 |
| H  | -0.01056606714233 | -0.56694196147389 | -2.47082787575034 |
| H  | 0.49376233475772  | 0.98869297404572  | -2.46849249268887 |
| N  | -1.29998737571533 | -0.35303886272317 | 0.17302686213265  |
| H  | -1.48918513436238 | -1.27740797866097 | 0.57655911321062  |
| H  | -1.82659116757593 | 0.31178511544725  | 0.75074376299328  |
| H  | -1.77244125626751 | -0.35313289855092 | -0.73793665189159 |

### Cr(NH<sub>3</sub>)<sub>5</sub>I<sup>2+</sup>

Charge = 2  
Spin Multiplicity = 4

|    |                   |                   |                   |
|----|-------------------|-------------------|-------------------|
| Cr | 0.71972871142121  | 0.08565646497933  | 0.02567693963302  |
| N  | 0.34081392319482  | 2.15541919420519  | 0.06787150510489  |
| H  | 1.24489166023520  | 2.64230846299511  | 0.05828332541328  |
| H  | -0.15006541868822 | 2.48608227248723  | 0.90617862224766  |
| H  | -0.18522386906173 | 2.53101557711712  | -0.72921550760262 |
| N  | 0.84936702538621  | 0.09855026532210  | 2.11902630124166  |
| H  | 1.51514673031899  | -0.60399887291397 | 2.45814712660796  |
| H  | 1.19500460491408  | 0.99730530498227  | 2.47202130959291  |
| H  | -0.03072488072541 | -0.08206889953993 | 2.61545066127241  |
| I  | 3.32957447703816  | 0.62424659572903  | -0.13162655812869 |
| N  | 1.19469019674721  | -1.96505005010364 | 0.03852015387913  |
| H  | 0.87620408041505  | -2.47874230774931 | 0.86780120257533  |
| H  | 0.86391798189067  | -2.50573080561316 | -0.76854711928657 |
| H  | 2.21813063131154  | -2.04769320230127 | 0.02870111742352  |
| N  | 0.62274403145568  | 0.08136138655476  | -2.07821936231095 |
| H  | 1.55609707510658  | 0.27952556432675  | -2.45796349106681 |
| H  | 0.33422189633852  | -0.80940043476429 | -2.49856691372953 |
| H  | 0.00062431467030  | 0.78997393222911  | -2.48340197519562 |
| N  | -1.34173567242461 | -0.34490462056919 | 0.19799037006538  |
| H  | -1.51842716785305 | -1.21743221327773 | 0.70774469443106  |
| H  | -1.85715815544596 | 0.38308269842684  | 0.70473335811102  |
| H  | -1.81908217624524 | -0.44752631252231 | -0.70380576027843 |

**Cr(NH<sub>3</sub>)<sub>5</sub>(THF)<sup>3+</sup>**

Charge = 3  
Spin Multiplicity = 4

|    |                   |                   |                   |
|----|-------------------|-------------------|-------------------|
| Cr | 0.71417640179943  | -0.02080688147422 | -0.00672645924544 |
| N  | 0.82234544915761  | 2.07445278138765  | 0.07467116318130  |
| H  | 1.59288136735381  | 2.45084004202986  | -0.49062046625631 |
| H  | 0.96257866066818  | 2.46151773953719  | 1.01555922930979  |
| H  | -0.02094086349337 | 2.54167512223002  | -0.27963921206039 |
| N  | 0.54926374036580  | -0.17272332819515 | 2.07839478823295  |
| H  | 1.43536855428883  | -0.45156072676403 | 2.51604196989072  |
| H  | 0.26631829420114  | 0.69317916164127  | 2.55201385227309  |
| H  | -0.13613360957882 | -0.87412142659594 | 2.38347228172545  |
| O  | 2.73972088174090  | -0.13724823911244 | 0.12622956873186  |
| N  | 0.58983778351577  | -2.11348619930544 | -0.14135204391161 |
| H  | 0.92233687641572  | -2.59152217734681 | 0.70467642132619  |
| H  | -0.36348403936704 | -2.46434961625097 | -0.29087381410105 |
| H  | 1.13977040423171  | -2.51332330090569 | -0.91099342123496 |
| N  | 0.82323708140307  | 0.11457160154073  | -2.09675139870949 |

|   |                   |                   |                   |
|---|-------------------|-------------------|-------------------|
| H | 1.79313867253680  | 0.13157736000845  | -2.43374798561671 |
| H | 0.37043916368973  | -0.66167796697079 | -2.59338388599195 |
| H | 0.39303092967908  | 0.96560222378703  | -2.47809066127580 |
| N | -1.36358353194307 | 0.11580767127513  | -0.09990261691825 |
| H | -1.84996856768000 | -0.70566934931019 | 0.27881288575296  |
| H | -1.73868768970645 | 0.91213614687683  | 0.42956933553751  |
| H | -1.72590161696912 | 0.22682933122506  | -1.05429357008713 |
| C | 3.62148678944230  | 0.85656496952081  | 0.81885994406928  |
| C | 3.59598783295407  | -1.22913660154991 | -0.44024540943409 |
| C | 5.01680387058942  | -0.71192243206404 | -0.31115046825284 |
| H | 3.27499718519747  | -1.39998269987994 | -1.47463766307557 |
| H | 3.42333335675486  | -2.12403490957015 | 0.17108129517293  |
| C | 4.95438377709110  | 0.14809858418903  | 0.96077046198788  |
| H | 3.14357042118119  | 1.11677171877446  | 1.77012153688480  |
| H | 3.69088036741212  | 1.73891897709230  | 0.16914717578673  |
| H | 4.96912354224895  | -0.47917493592904 | 1.86231634112408  |
| H | 5.77807625066091  | 0.86946031690817  | 1.02199482661781  |
| H | 5.29096768884944  | -0.10336199256160 | -1.18317679165114 |
| H | 5.72884457530847  | -1.54139096423762 | -0.22483720978262 |

### Cr(NH<sub>3</sub>)<sub>5</sub>O<sup>+</sup>

Charge = 1

Spin Multiplicity = 4

|    |                   |                   |                   |
|----|-------------------|-------------------|-------------------|
| Cr | 0.75699822316616  | 0.03402442364285  | -0.09092642788347 |
| N  | 0.78014520453398  | 2.16753208108311  | 0.01671709761595  |
| H  | 1.79422973485382  | 2.31070675843425  | -0.06901377838432 |
| H  | 0.48059560024257  | 2.60764984951618  | 0.89148466293868  |
| H  | 0.32485904796840  | 2.69252106729181  | -0.73541118953248 |
| N  | 0.90339367948223  | -0.08500736081340 | 2.03658227960710  |
| H  | 1.92768114275096  | -0.07900798648501 | 2.11930558879678  |
| H  | 0.54377287756274  | 0.69937998909291  | 2.58802796198494  |
| H  | 0.55954850047895  | -0.93430617696951 | 2.49376407339465  |
| O  | 2.52374783240336  | 0.04861730675954  | -0.18486435567962 |
| N  | 0.81017051991937  | -2.09903056885993 | -0.21258122667811 |
| H  | 0.47198216107891  | -2.63960928574104 | 0.58873520660581  |
| H  | 0.40920275586339  | -2.54162869019239 | -1.04437249681996 |
| H  | 1.83040745562930  | -2.21478582875754 | -0.25898194777639 |
| N  | 0.69270927551197  | 0.14570888706501  | -2.22435529768663 |
| H  | 1.70648150883837  | 0.12379947963739  | -2.39368604672659 |
| H  | 0.27189074043016  | -0.63296613734020 | -2.73936694764923 |
| H  | 0.32711281632383  | 1.00118883068104  | -2.65229574988896 |
| N  | -1.49580597515014 | 0.02363188201443  | 0.03139330601865  |
| H  | -1.88600821829310 | -0.89017958893472 | 0.28151720294779  |
| H  | -1.86824387364290 | 0.67856511523627  | 0.72577064618239  |

H -1.94581100995233 0.27861595363896 -0.85314256138697

**Cr(NH<sub>3</sub>)<sub>5</sub>(OtBu)<sup>2+</sup>**

Charge = 2

Spin Multiplicity = 4

|    |                   |                   |                   |
|----|-------------------|-------------------|-------------------|
| Cr | 0.72424905841409  | 0.28174740475803  | 0.04449053636154  |
| N  | 0.04824921847192  | 2.23614627600457  | -0.39386818665669 |
| H  | 0.87851742747072  | 2.83708206725587  | -0.43453004815763 |
| H  | -0.59505019925989 | 2.66687356380230  | 0.27827218359089  |
| H  | -0.41077436422121 | 2.32763383463763  | -1.30600954869885 |
| N  | 0.58086960021569  | 0.67310345893536  | 2.11351883036547  |
| H  | 1.44940666274768  | 0.44029804314953  | 2.60644129138035  |
| H  | 0.39821747081825  | 1.65777483423453  | 2.33416833936466  |
| H  | -0.15946762335909 | 0.14515618596835  | 2.58877131928452  |
| O  | 2.49731279304454  | 0.81531897119410  | -0.21906663560675 |
| N  | 1.35093998756552  | -1.69275117177214 | 0.46796400759217  |
| H  | 1.23895385691610  | -1.99869370960099 | 1.44013000158390  |
| H  | 0.91530987346011  | -2.42633463921011 | -0.10086528461834 |
| H  | 2.35642469267608  | -1.73024310878233 | 0.26865002437580  |
| N  | 0.79126861014757  | -0.17936856783635 | -2.02536124638811 |
| H  | 1.76606102810354  | 0.02775283512761  | -2.27299681879395 |
| H  | 0.61759540952016  | -1.15511941122458 | -2.28694150840824 |
| H  | 0.20300131232155  | 0.38430940643391  | -2.64734959594553 |
| N  | -1.33179071162095 | -0.36816595782233 | 0.09947583024748  |
| H  | -1.47464066226173 | -1.24626070397654 | 0.61002872182039  |
| H  | -1.96562386428501 | 0.30811747498877  | 0.53859723710713  |
| H  | -1.72212722189322 | -0.53401317156003 | -0.83399721605581 |
| C  | 3.64176121014728  | 1.32296275293009  | 0.48532569316587  |
| C  | 3.31815731088918  | 2.66210210217608  | 1.16765520427658  |
| C  | 4.72578582325818  | 1.54561224111372  | -0.58399632871735 |
| H  | 4.37792498505772  | 2.27224274530060  | -1.33170662162250 |
| H  | 4.95460647622449  | 0.60013290382764  | -1.09538044630600 |
| H  | 5.65131362885771  | 1.92917758752490  | -0.13035375198921 |
| H  | 2.97468041199562  | 3.39781255711930  | 0.42503049083704  |
| H  | 4.21287575377949  | 3.07619363629677  | 1.65476524426875  |
| H  | 2.54612925471041  | 2.55433543583235  | 1.94299365443945  |
| C  | 4.15189109483756  | 0.29950667698434  | 1.51414036646336  |
| H  | 5.07112068095603  | 0.66151067937230  | 1.99673377977682  |
| H  | 4.38465141555480  | -0.65776664704815 | 1.02468013895582  |
| H  | 3.42085959873910  | 0.11344341386491  | 2.31530034270697  |

**Cr(NH<sub>3</sub>)<sub>5</sub>N**

Charge = 0  
Spin Multiplicity = 4

|    |                   |                   |                   |
|----|-------------------|-------------------|-------------------|
| Cr | 0.63055026650039  | 0.03009640393609  | -0.08929957505596 |
| N  | 0.78533487497830  | 2.18558706877452  | 0.03447387903036  |
| H  | 1.80857131672082  | 1.92614051176462  | -0.04343556076054 |
| H  | 0.60227957739664  | 2.68480366019934  | 0.90811122283928  |
| H  | 0.50323270703031  | 2.79029811365082  | -0.74033251429839 |
| N  | 0.90386809908484  | -0.09555306948483 | 2.04987219843889  |
| H  | 1.91727306268925  | -0.05579370355688 | 1.76265788032055  |
| H  | 0.67158543079506  | 0.68912820001307  | 2.66325401310083  |
| H  | 0.70974168703327  | -0.96115427913957 | 2.55885464833965  |
| N  | 2.43968076789218  | 0.04981898261607  | -0.19710681240310 |
| N  | 0.79988694086174  | -2.11862079033401 | -0.21991723663752 |
| H  | 0.58569008568058  | -2.72285706692229 | 0.57692988596782  |
| H  | 0.54175532522418  | -2.62005440404073 | -1.07308455028275 |
| H  | 1.82468388508129  | -1.86420305971544 | -0.23741607384039 |
| N  | 0.65992419354392  | 0.15858331626474  | -2.24832492668407 |
| H  | 1.69911225119156  | 0.13847955081795  | -2.05864793108053 |
| H  | 0.38193089128972  | -0.62959589396270 | -2.83781863269761 |
| H  | 0.40053723899568  | 1.02056875034449  | -2.73399984614227 |
| N  | -1.69083868366951 | 0.02122049216654  | 0.04530428241066  |
| H  | -2.07195010061719 | -0.85742243974454 | 0.40675439017517  |
| H  | -2.05298618903754 | 0.75940624510307  | 0.65503042281879  |
| H  | -2.13076362866548 | 0.16654341124965  | -0.86755916355885 |

**Cr(NH<sub>3</sub>)<sub>5</sub>(NtBu)<sup>1+</sup>**

Charge = 1  
Spin Multiplicity = 4

|    |                   |                   |                   |
|----|-------------------|-------------------|-------------------|
| Cr | 0.86171309501623  | -0.02864180688965 | 0.00357987372756  |
| N  | 0.80971142896008  | 2.07454480881247  | 0.42226348301698  |
| H  | 1.81457601204293  | 2.26121019900229  | 0.30699564607504  |
| H  | 0.52948480090084  | 2.39807139264591  | 1.35311886099304  |
| H  | 0.30338358805837  | 2.66169133788256  | -0.24719037172733 |
| N  | 0.74095794252292  | -0.48852948147224 | 2.07508252401347  |
| H  | 1.48072586243113  | -1.14203896174786 | 2.35049307708029  |
| H  | 0.86388162374139  | 0.33051468724808  | 2.67811713085821  |
| H  | -0.14493167240434 | -0.91682941308885 | 2.36370095033213  |
| N  | 2.69239679048665  | 0.04018672865431  | -0.21146800055485 |
| N  | 0.86845597982707  | -2.12379172979041 | -0.45002939377509 |
| H  | 0.69043076198916  | -2.78726377811390 | 0.30985125556363  |
| H  | 0.30658860414403  | -2.44002819457897 | -1.24607016617197 |
| H  | 1.86153368813406  | -2.20050586635227 | -0.70684669140424 |
| N  | 0.86749960093660  | 0.41145564805528  | -2.13721633085589 |

|   |                   |                   |                   |
|---|-------------------|-------------------|-------------------|
| H | 1.90394489954211  | 0.40153479824804  | -2.07529235640805 |
| H | 0.55672545128506  | -0.29009758856487 | -2.81458533322860 |
| H | 0.55439106707805  | 1.32221026831714  | -2.48363953058249 |
| N | -1.41665387192222 | -0.03229947787407 | -0.02858929298259 |
| H | -1.84765962005877 | -0.94706540227554 | 0.13762348836650  |
| H | -1.84969632666225 | 0.60411694857009  | 0.64788631093537  |
| H | -1.76148185909172 | 0.26812408753042  | -0.94514800138505 |
| C | 3.90652428845497  | -0.10754168909829 | 0.55556098564338  |
| C | 3.99702323273803  | 0.87789419160440  | 1.75615380077622  |
| H | 3.18773587823169  | 0.69754283956517  | 2.48014405905113  |
| H | 3.90837689313440  | 1.91547290798739  | 1.39718016284689  |
| H | 4.95306176870898  | 0.78727389487079  | 2.30050363746373  |
| C | 4.10651885585060  | -1.54921041201891 | 1.10740468922831  |
| H | 4.09748955513742  | -2.27344017930989 | 0.27801022989537  |
| H | 3.29973202976783  | -1.82738026464812 | 1.80448208898188  |
| H | 5.06041040075719  | -1.66288991293848 | 1.65125220841536  |
| C | 5.10908411672867  | 0.19353587218773  | -0.37479312918542 |
| H | 5.02627057009679  | 1.21973382688080  | -0.76251788166244 |
| H | 5.09302442904568  | -0.49441677963244 | -1.23309980302485 |
| H | 6.07775013439037  | 0.08895650033187  | 0.14323181968439  |

### Cr(NH<sub>3</sub>)<sub>5</sub>(Py)<sup>3+</sup>

Charge = 3

Spin Multiplicity = 4

|    |                   |                   |                   |
|----|-------------------|-------------------|-------------------|
| Cr | 0.51450975747307  | -0.12031220663238 | 0.08824818051844  |
| N  | 0.68547045102313  | 1.97210472742844  | 0.00268383193940  |
| H  | 1.55851109093728  | 2.27627456986862  | -0.44494105523175 |
| H  | 0.66599830692151  | 2.44692368264840  | 0.91302799035534  |
| H  | -0.06494429335350 | 2.41738929412504  | -0.53893103329911 |
| N  | 0.37315992822022  | -0.13278034414500 | 2.18502877007466  |
| H  | 1.16559923051305  | -0.61312785576905 | 2.62809568452772  |
| H  | 0.33214350934899  | 0.79329412757338  | 2.62677702495743  |
| H  | -0.46211785562130 | -0.62352232602656 | 2.52630324019742  |
| N  | 2.58621317926967  | -0.30998987426984 | 0.19533995831659  |
| N  | 0.30052307191429  | -2.21129497747909 | 0.17235692532264  |
| H  | -0.52416816105308 | -2.51671260593861 | 0.70293294550068  |
| H  | 0.20934918432314  | -2.67289511606923 | -0.74028997197947 |
| H  | 1.09619554063599  | -2.66882027806745 | 0.63380643513167  |
| N  | 0.59391784702180  | -0.11696274861466 | -2.01244193599976 |
| H  | 1.53507178922830  | 0.07535820765642  | -2.37645635171616 |
| H  | 0.30251930027639  | -0.99790061862229 | -2.45210080287900 |
| H  | -0.00565304164008 | 0.59860371203802  | -2.44041733841598 |
| N  | -1.57966717817879 | 0.09535777344959  | -0.00835747803839 |
| H  | -2.09117262771206 | -0.79112447836824 | 0.07305642542168  |



|   |                   |                   |                   |
|---|-------------------|-------------------|-------------------|
| H | -1.95738482841009 | 0.69591911782819  | 0.73420674399378  |
| H | -1.91609377164392 | 0.50905435616711  | -0.88574026989523 |
| C | 3.31460453197233  | 0.46865699689750  | 1.03484402207057  |
| C | 3.24707908274306  | -1.21387398328416 | -0.57169461644423 |
| C | 4.62689306672046  | -1.36475401647557 | -0.52542797258867 |
| C | 4.69659908278821  | 0.37132543534559  | 1.13255990443345  |
| C | 5.36932474054380  | -0.56020099908847 | 0.34045421998954  |
| H | 5.10379040754849  | -2.10673947533949 | -1.16415945160900 |
| H | 6.45339397250465  | -0.65764575519062 | 0.39685925938039  |
| H | 5.22952213263913  | 1.02243590534052  | 1.82392829733863  |
| H | 2.77143513821055  | 1.18978657229975  | 1.64451111909369  |
| H | 2.65023741483528  | -1.83334681928590 | -1.24045270046693 |

**Cr(NH<sub>3</sub>)<sub>5</sub>(CH<sub>3</sub>)<sup>2+</sup>**

Charge = 2

Spin Multiplicity = 4

|    |                   |                   |                   |
|----|-------------------|-------------------|-------------------|
| Cr | 0.97369901493871  | 0.13277342978170  | 0.07236490084751  |
| N  | 0.50636495583729  | 2.19517476323682  | 0.07177059990547  |
| H  | 1.35950507809377  | 2.75982790590599  | 0.00173164923782  |
| H  | 0.02554586801884  | 2.51735251630383  | 0.91860399647414  |
| H  | -0.09298846344444 | 2.49200317089138  | -0.70586256956996 |
| N  | 1.05324820998134  | 0.11494057829772  | 2.18464930570321  |
| H  | 1.86750387914238  | -0.41535424946810 | 2.51280335717931  |
| H  | 1.16804052777771  | 1.05141734778133  | 2.58670894595835  |
| H  | 0.23984004326052  | -0.29281635410182 | 2.65855820882173  |
| C  | 2.99398184000028  | 0.60692128807829  | 0.00434037303388  |
| N  | 1.35554439072828  | -1.94923547639383 | 0.08668901054129  |
| H  | 0.94999203045371  | -2.44607884618344 | 0.88724872343265  |
| H  | 1.01198213391499  | -2.44432993254828 | -0.74335524803099 |
| H  | 2.36325587218364  | -2.13610295927221 | 0.12356016514882  |
| N  | 0.95987963998181  | 0.08535464193879  | -2.04056244295115 |
| H  | 1.79842738332590  | -0.38835504265479 | -2.39312829732996 |
| H  | 0.16044581484612  | -0.39217073960977 | -2.47113360416506 |
| H  | 0.98469641366676  | 1.01935781529271  | -2.46353602810535 |
| N  | -1.22028286398436 | -0.28052114469229 | 0.11921876211446  |
| H  | -1.46092585015099 | -1.27743642194874 | 0.11416272438214  |
| H  | -1.69167470608874 | 0.10277138716422  | 0.94564825809392  |
| H  | -1.72543669528328 | 0.11851883824914  | -0.67940068895467 |
| H  | 3.32299765684536  | 1.09182235065554  | 0.93875018740105  |
| H  | 3.62818017445402  | -0.28176927016779 | -0.15245281120837 |
| H  | 3.19888765150036  | 1.30770440346362  | -0.82297747796024 |

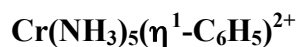

Charge = 2

Spin Multiplicity = 4

|    |                   |                   |                   |
|----|-------------------|-------------------|-------------------|
| Cr | 0.50675232919723  | -0.13708373522067 | 0.09155277322175  |
| N  | -1.70904234125911 | 0.01081849463970  | -0.00211231280279 |
| H  | -2.19215241453572 | -0.63693724865145 | 0.62939570812481  |
| H  | -2.07194577297892 | 0.93796052304326  | 0.24480969717392  |
| H  | -2.09558492287305 | -0.18405938894483 | -0.93214461648886 |
| C  | 3.32850117549489  | 0.53920405120608  | 1.04528726433227  |
| C  | 3.28059523878787  | -1.21900682436089 | -0.58474703672462 |
| C  | 4.67576591135183  | -1.32661267808168 | -0.51985079944354 |
| C  | 4.72372416012286  | 0.44118795361810  | 1.12114822515408  |
| C  | 5.40314835353458  | -0.49492003414917 | 0.33639653381092  |
| H  | 5.19362460330710  | -2.06171225861181 | -1.13953399392114 |
| H  | 6.48985363969216  | -0.57539811699897 | 0.39140217676900  |
| H  | 5.27917056439358  | 1.09727104281112  | 1.79461083569721  |
| H  | 2.84653270877239  | 1.29307643878423  | 1.67757620075721  |
| H  | 2.75801509633377  | -1.89575629269969 | -1.26946408700903 |
| N  | 0.63732611814882  | 1.97346995382218  | 0.07203339484750  |
| H  | 1.53762342338063  | 2.26556390795770  | -0.32376932582352 |
| H  | 0.59026383230875  | 2.41048554320617  | 0.99884330761880  |
| H  | -0.08572451481772 | 2.44277109882311  | -0.48450970283660 |
| N  | 0.36837590504193  | -0.15199797507912 | 2.19881295722352  |
| H  | 0.09654551661547  | -1.06135403610906 | 2.58746715299492  |
| H  | 1.27975328123112  | 0.06021107403300  | 2.62055400433464  |
| H  | -0.29638191317242 | 0.52242372793057  | 2.59350769828707  |
| C  | 2.56258429877964  | -0.28550910571568 | 0.19348055395382  |
| N  | 0.33126152464342  | -2.24308576415113 | 0.09603285837797  |
| H  | -0.53429029654831 | -2.60185585776134 | 0.51418485743700  |
| H  | 0.37174241665540  | -2.66988866202203 | -0.83592283444113 |
| H  | 1.10350049779409  | -2.66364564468737 | 0.62431612140887  |
| N  | 0.57639298541599  | -0.09938036314778 | -2.02165302626158 |
| H  | 1.54381173937522  | -0.21219225460303 | -2.34495163994927 |
| H  | 0.03220203179857  | -0.83470332991441 | -2.48580736491398 |
| H  | 0.24891682400794  | 0.78113376103487  | -2.43333558090922 |

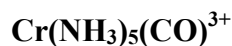

Charge = 3

Spin Multiplicity = 4

|    |                  |                  |                   |
|----|------------------|------------------|-------------------|
| Cr | 0.75889290804765 | 0.09781233895187 | 0.06008090940528  |
| N  | 0.30911384076998 | 2.14243887913896 | 0.03476087637355  |
| H  | 1.02061797782627 | 2.72490952224298 | -0.42422110819674 |
| H  | 0.19252978857495 | 2.55155748720721 | 0.96971329628017  |

|   |                   |                   |                   |
|---|-------------------|-------------------|-------------------|
| H | -0.56769967063973 | 2.34637452022796  | -0.46111174363626 |
| N | 0.86676798666945  | 0.10401699112775  | 2.15224726694185  |
| H | 1.54163027235476  | -0.56947553290506 | 2.53530405175849  |
| H | 1.13915539830891  | 1.00976042425171  | 2.55374470324727  |
| H | -0.03038732497328 | -0.12969428435739 | 2.59535943915251  |
| C | 2.80846509866311  | 0.56805851695329  | 0.04203492683074  |
| N | 1.22077619007448  | -1.94237850861625 | 0.01410048834059  |
| H | 1.22777039736664  | -2.38591990942222 | 0.94070735867444  |
| H | 0.54926790626158  | -2.48503518642916 | -0.54327796672243 |
| H | 2.13969785552980  | -2.15880799235955 | -0.39193833363739 |
| N | 0.74676062049358  | 0.07791331708863  | -2.03289197800606 |
| H | 1.65153628308668  | -0.16935035063694 | -2.45249797026270 |
| H | 0.07871333002421  | -0.59691433926453 | -2.42604879445510 |
| H | 0.49815099743846  | 0.98354849691668  | -2.44879354999494 |
| N | -1.26092165186929 | -0.33432126894294 | 0.14629321950431  |
| H | -1.46229176966210 | -1.27352738967780 | 0.51219405399409  |
| H | -1.78464403858134 | 0.31223983971931  | 0.74989554738886  |
| H | -1.73103716287889 | -0.29191354759189 | -0.76664324373631 |
| O | 3.90762476711411  | 0.82409797637736  | 0.04674855075577  |

**Cr(NH<sub>3</sub>)<sub>5</sub>(NHC)<sup>3+</sup> (NHC = 1,3-dimethylimidazolium-2-yl)**

Charge = 3

Spin Multiplicity = 4

|    |                   |                   |                   |
|----|-------------------|-------------------|-------------------|
| Cr | 1.18507276417926  | 0.18321463844488  | 0.04515774269874  |
| N  | 0.76940137078452  | 2.25258905084140  | 0.04601848478154  |
| H  | 1.56817840768165  | 2.81692566443780  | -0.26540540702797 |
| H  | 0.47893933260346  | 2.65052100153357  | 0.94658298697847  |
| H  | 0.00698388279768  | 2.49463008830798  | -0.59824412914441 |
| N  | 1.10455034760799  | 0.01613160107345  | 2.14486767911039  |
| H  | 1.99843313760228  | -0.27347384825001 | 2.55668744896488  |
| H  | 0.83519349598322  | 0.87440016775948  | 2.63837847346930  |
| H  | 0.42604481039747  | -0.68652696870799 | 2.46180658470272  |
| C  | 3.28928215715618  | 0.51667110159733  | 0.04780540111437  |
| N  | 1.43430721599041  | -1.91233149476906 | 0.03141520654661  |
| H  | 0.83282258655961  | -2.38691412949244 | 0.71534425515410  |
| H  | 1.21671354410624  | -2.37037328718490 | -0.86118099700586 |
| H  | 2.38765840400885  | -2.20376582654857 | 0.27522324133275  |
| N  | 1.07465648824198  | 0.33090706850349  | -2.05646578744855 |
| H  | 1.83429759321665  | 0.89569858874829  | -2.45251416231293 |
| H  | 1.10074668820964  | -0.56285272587977 | -2.56008064852946 |
| H  | 0.21184609328252  | 0.78542454674022  | -2.37898260330050 |
| N  | -0.93791583907623 | -0.14922663141449 | 0.06400662776534  |
| H  | -1.22085132824804 | -1.02507346184486 | 0.51834908427867  |

|   |                   |                   |                   |
|---|-------------------|-------------------|-------------------|
| H | -1.45897060017311 | 0.58425198693769  | 0.55856761746457  |
| H | -1.36263675322012 | -0.19637514001314 | -0.86923017423555 |
| N | 4.02089817146374  | 1.31126341067279  | 0.89536632618897  |
| N | 4.23291109502190  | -0.01174186666446 | -0.79827178783831 |
| C | 5.49900752876821  | 0.44159014711920  | -0.48460376122624 |
| C | 5.36575242772409  | 1.27324405656003  | 0.58396700694829  |
| H | 6.10487591533246  | 1.83152502373846  | 1.14631572722895  |
| H | 6.37585705726359  | 0.14005226738864  | -1.04538542984058 |
| C | 4.01833268317983  | -0.88177777879264 | -1.95854409508972 |
| H | 3.14435183961950  | -1.51778287228671 | -1.80932019635973 |
| H | 4.89374103445826  | -1.52879804367383 | -2.07345258401674 |
| H | 3.89919423450548  | -0.28434382521309 | -2.87109232368663 |
| C | 3.54509048368155  | 2.07006647071388  | 2.05591331092549  |
| H | 2.51701301257894  | 2.40378933974265  | 1.90517091112114  |
| H | 4.17622854337208  | 2.95670986337538  | 2.17281318776625  |
| H | 3.61622217333827  | 1.46369181649937  | 2.96779678252162  |

Compounds for the calculated V2C library are indexed alphabetically by CCSD entry identifier.

### ABEXOU<sup>1</sup>

Tricarbonyl-( $\eta^6$ -N,N-diethyl-2-methyl-6-( $\alpha$ -hydroxyethyl)benzamide)-chromium(0)

Charge = 0

Spin Multiplicity = 1

|    |           |           |           |
|----|-----------|-----------|-----------|
| Cr | 0.034939  | -0.065817 | 0.027347  |
| O  | 3.091472  | 1.846053  | 0.488219  |
| O  | -0.886411 | 3.043463  | 2.064277  |
| O  | 2.399268  | -1.897975 | 0.249559  |
| O  | -1.702292 | -2.492769 | 0.321394  |
| O  | 0.135340  | 0.031870  | 3.027419  |
| N  | 2.983175  | 3.281232  | -1.285179 |
| C  | 1.085969  | 1.757727  | -0.829233 |
| C  | -0.050878 | 2.183156  | -0.077400 |
| C  | -1.334354 | 1.656866  | -0.392788 |
| C  | -1.478552 | 0.700756  | -1.416705 |
| C  | -0.349758 | 0.258191  | -2.149920 |
| C  | 0.943616  | 0.755022  | -1.849453 |
| C  | 2.470672  | 2.299900  | -0.485951 |
| C  | 2.254233  | 3.937395  | -2.383059 |
| C  | 2.940882  | 3.839955  | -3.747561 |
| C  | 4.301317  | 3.835771  | -0.921321 |
| C  | 4.210024  | 5.002614  | 0.064838  |
| C  | 0.068458  | 3.252052  | 1.012705  |
| C  | -0.080254 | 4.658143  | 0.426852  |
| C  | 2.125212  | 0.253596  | -2.637059 |

|   |           |           |           |
|---|-----------|-----------|-----------|
| C | 1.481971  | -1.175438 | 0.158116  |
| C | -1.025941 | -1.541836 | 0.208617  |
| C | 0.086917  | 0.026813  | 1.858701  |
| H | -2.195541 | 1.951447  | 0.203106  |
| H | -2.458708 | 0.273875  | -1.624418 |
| H | -0.463766 | -0.510161 | -2.913055 |
| H | 1.252936  | 3.493721  | -2.435559 |
| H | 2.118047  | 5.000492  | -2.122125 |
| H | 3.903298  | 4.368332  | -3.764851 |
| H | 2.295350  | 4.305919  | -4.505288 |
| H | 3.116129  | 2.796443  | -4.040137 |
| H | 4.794741  | 4.153036  | -1.848814 |
| H | 4.891705  | 3.019165  | -0.489520 |
| H | 3.754069  | 4.681466  | 1.010924  |
| H | 5.219599  | 5.380077  | 0.282214  |
| H | 3.621937  | 5.836436  | -0.344680 |
| H | 1.055331  | 3.147138  | 1.485328  |
| H | 0.034635  | 5.402576  | 1.226501  |
| H | 0.674922  | 4.861588  | -0.342556 |
| H | -1.073226 | 4.779828  | -0.034097 |
| H | -1.673340 | 3.584247  | 1.867058  |
| H | 3.056942  | 0.302129  | -2.060805 |
| H | 2.256727  | 0.857123  | -3.547595 |
| H | 1.962621  | -0.784797 | -2.951682 |

## ABORCR10<sup>2</sup>

$\pi$ -(exo-2-Acetoxybenzonorbornenyl)-exo-tricarbonyl-chromium(0)

Charge = 0

Spin Multiplicity = 1

|    |           |          |           |
|----|-----------|----------|-----------|
| Cr | 3.778074  | 2.792599 | 0.589582  |
| C  | 0.748340  | 3.032594 | 2.263796  |
| C  | 1.870443  | 2.217437 | 1.650412  |
| C  | 1.628078  | 2.183409 | 0.252006  |
| C  | -2.641219 | 1.975027 | 3.216576  |
| C  | -3.668076 | 2.757714 | 3.990616  |
| C  | 4.160974  | 4.100834 | 1.809321  |
| C  | 5.566077  | 2.703819 | 0.222597  |
| C  | 3.645254  | 4.091681 | -0.689007 |
| C  | -0.498631 | 2.106313 | 2.148187  |
| C  | -0.781263 | 2.065814 | 0.616909  |
| C  | 0.350315  | 2.966876 | 0.020684  |
| C  | 2.453816  | 1.413333 | -0.604489 |
| C  | 3.516345  | 0.671941 | -0.038676 |
| C  | 3.754720  | 0.700268 | 1.366827  |

|   |           |          |           |
|---|-----------|----------|-----------|
| C | 2.939169  | 1.479005 | 2.218658  |
| C | 0.460094  | 4.046514 | 1.126662  |
| O | -1.577528 | 2.758298 | 2.887377  |
| O | -2.728218 | 0.795866 | 2.910632  |
| O | 4.417884  | 4.941683 | 2.584689  |
| O | 6.712663  | 2.654855 | -0.016255 |
| O | 3.564563  | 4.927716 | -1.507004 |
| H | 0.924908  | 3.416178 | 3.273542  |
| H | -4.499206 | 2.102422 | 4.268007  |
| H | -4.040535 | 3.591858 | 3.379465  |
| H | -3.213167 | 3.189818 | 4.892530  |
| H | -0.342721 | 1.114251 | 2.586476  |
| H | -0.775166 | 1.044824 | 0.216610  |
| H | -1.763179 | 2.510677 | 0.407573  |
| H | 0.172504  | 3.306476 | -1.004554 |
| H | 2.296488  | 1.408091 | -1.682406 |
| H | 4.178938  | 0.099831 | -0.684850 |
| H | 4.598795  | 0.151269 | 1.780388  |
| H | 3.147941  | 1.523791 | 3.286808  |
| H | -0.479488 | 4.593779 | 1.276851  |
| H | 1.286336  | 4.749090 | 0.965739  |

### ABUKIS<sup>3</sup>

Methyl-(perfluorophenyl)-(η<sup>5</sup>-pentamethylcyclopentadienyl)-(pyridine)-chromium(III)

Charge = 0

Spin Multiplicity = 4

|    |          |          |          |
|----|----------|----------|----------|
| Cr | -1.13281 | -1.03274 | 10.68737 |
| F  | 2.02907  | -0.35151 | 10.00410 |
| F  | 4.01542  | -1.79562 | 9.05834  |
| F  | 3.71331  | -4.46949 | 8.59537  |
| F  | 1.31862  | -5.63487 | 9.14187  |
| F  | -0.73703 | -4.18854 | 10.03241 |
| N  | -2.59834 | -1.73161 | 9.33442  |
| C  | -3.32935 | -2.81774 | 9.62608  |
| H  | -3.12878 | -3.28315 | 10.40619 |
| C  | -4.34818 | -3.27979 | 8.84880  |
| H  | -4.82403 | -4.03813 | 9.10081  |
| C  | -4.66294 | -2.61666 | 7.69350  |
| H  | -5.36013 | -2.90792 | 7.15125  |
| C  | -3.92046 | -1.51276 | 7.35654  |
| H  | -4.10590 | -1.04680 | 6.57501  |
| C  | -2.90125 | -1.10124 | 8.18337  |
| H  | -2.40144 | -0.35679 | 7.93702  |
| C  | 0.51656  | -2.16850 | 10.00551 |

|   |          |          |          |
|---|----------|----------|----------|
| C | 1.77093  | -1.66559 | 9.75067  |
| C | 2.82776  | -2.38903 | 9.29619  |
| C | 2.66866  | -3.73143 | 9.05551  |
| C | 1.47592  | -4.32245 | 9.32026  |
| C | 0.42708  | -3.54330 | 9.79456  |
| C | -0.41297 | -0.08977 | 12.58653 |
| C | -0.48903 | -1.48979 | 12.80315 |
| C | -1.79894 | -1.89179 | 12.69838 |
| C | -2.59926 | -0.74995 | 12.40672 |
| C | -1.72416 | 0.36298  | 12.34726 |
| C | 0.80551  | 0.76180  | 12.68139 |
| H | 0.75138  | 1.30936  | 13.46858 |
| H | 0.86613  | 1.32197  | 11.90411 |
| H | 1.58327  | 0.20172  | 12.73519 |
| C | 0.66170  | -2.38992 | 13.20524 |
| H | 0.77669  | -2.35562 | 14.15808 |
| H | 1.46611  | -2.09225 | 12.77342 |
| H | 0.46980  | -3.29218 | 12.93907 |
| C | -2.35305 | -3.26387 | 13.01552 |
| H | -1.87370 | -3.92753 | 12.51433 |
| H | -3.28354 | -3.29549 | 12.77908 |
| H | -2.25447 | -3.44039 | 13.95420 |
| C | -4.10044 | -0.70977 | 12.29771 |
| H | -4.48701 | -0.78614 | 13.17268 |
| H | -4.40190 | -1.43802 | 11.74979 |
| H | -4.37021 | 0.12132  | 11.89987 |
| C | -2.10229 | 1.81408  | 12.15896 |
| H | -3.01842 | 1.87224  | 11.87863 |
| H | -1.53630 | 2.20840  | 11.49070 |
| H | -1.99251 | 2.28354  | 12.99004 |
| C | -0.70036 | 0.60545  | 9.49016  |
| H | -0.32551 | 0.30443  | 8.65908  |
| H | -0.06885 | 1.17176  | 9.93897  |
| H | -1.50632 | 1.09817  | 9.31743  |

#### ACBCRA10<sup>4</sup>

*mer*-Bromo-tricarbonyl-(N,N-diethylaminocarbyne)-triphenylphosphine-chromium

Charge = 0

Spin Multiplicity = 4

|    |          |          |          |
|----|----------|----------|----------|
| Cr | 8.207665 | 2.152304 | 4.957990 |
| C  | 8.180543 | 1.977180 | 6.863518 |
| O  | 8.200561 | 1.934980 | 8.014261 |
| C  | 8.023209 | 2.353020 | 3.064538 |
| O  | 7.913398 | 2.560265 | 1.936250 |

|   |           |           |          |
|---|-----------|-----------|----------|
| C | 7.090626  | 3.692503  | 5.062346 |
| O | 6.492336  | 4.676277  | 5.116893 |
| C | 9.415068  | 0.681524  | 4.870451 |
| O | 10.219918 | -0.146638 | 4.837727 |
| C | 9.611607  | 3.235444  | 5.037515 |
| N | 10.600827 | 4.036155  | 5.165611 |
| C | 10.676588 | 4.918193  | 6.383582 |
| C | 11.822751 | 4.540143  | 7.310575 |
| C | 11.717955 | 4.169297  | 4.172784 |
| C | 11.475134 | 3.451129  | 2.858635 |
| P | 6.184191  | 0.651867  | 4.879751 |
| C | 4.663720  | 1.679960  | 4.822163 |
| C | 4.080481  | 2.024628  | 3.592108 |
| C | 2.988142  | 2.895247  | 3.551810 |
| C | 2.474250  | 3.435320  | 4.734003 |
| C | 3.061679  | 3.108546  | 5.959964 |
| C | 4.154985  | 2.241704  | 6.006081 |
| C | 6.057345  | -0.485519 | 3.433529 |
| C | 4.839399  | -1.143010 | 3.179456 |
| C | 4.741541  | -2.062258 | 2.135251 |
| C | 5.856931  | -2.345407 | 1.338598 |
| C | 7.070869  | -1.704371 | 1.590982 |
| C | 7.170011  | -0.778140 | 2.634052 |
| C | 5.945762  | -0.505108 | 6.296683 |
| C | 7.065793  | -1.123308 | 6.873622 |
| C | 6.908244  | -2.085873 | 7.873101 |
| C | 5.628792  | -2.437123 | 8.311598 |
| C | 4.507702  | -1.827271 | 7.741213 |
| C | 4.661488  | -0.869518 | 6.736027 |
| H | 9.708993  | 4.837863  | 6.893029 |
| H | 10.776268 | 5.944635  | 6.003741 |
| H | 11.732660 | 3.502397  | 7.658080 |
| H | 11.785799 | 5.199355  | 8.188848 |
| H | 12.801878 | 4.673607  | 6.833615 |
| H | 11.837942 | 5.250948  | 4.017509 |
| H | 12.623473 | 3.792948  | 4.667752 |
| H | 10.590461 | 3.841147  | 2.338937 |
| H | 11.368982 | 2.367074  | 2.993241 |
| H | 12.347370 | 3.621522  | 2.213663 |
| H | 4.466163  | 1.607928  | 2.661165 |
| H | 2.538290  | 3.148166  | 2.590792 |
| H | 1.618937  | 4.111553  | 4.700356 |
| H | 2.669315  | 3.529111  | 6.886798 |
| H | 4.603913  | 2.002352  | 6.971309 |
| H | 3.960891  | -0.938856 | 3.792136 |
| H | 3.790110  | -2.560839 | 1.945112 |



|   |          |           |          |
|---|----------|-----------|----------|
| H | 5.777439 | -3.065921 | 0.523404 |
| H | 7.946502 | -1.920071 | 0.977587 |
| H | 8.126744 | -0.291306 | 2.816878 |
| H | 8.072111 | -0.866566 | 6.543378 |
| H | 3.505255 | -2.095236 | 8.077948 |
| H | 3.774869 | -0.408428 | 6.301549 |
| H | 5.505495 | -3.184227 | 9.096778 |
| H | 7.789199 | -2.557018 | 8.310638 |

### ACEMIG<sup>5</sup>

( $\eta^6$ -*t*-Butyl((2,3-diethyl-4,7-dimethoxy-5-phenyl-5,6-dihydronaphthalen-1-yl)oxy)dimethylsilane)-tricarbonyl-chromium(0)

Charge = 0

Spin Multiplicity = 1

|    |           |           |           |
|----|-----------|-----------|-----------|
| Cr | -0.028350 | 0.015187  | 0.058574  |
| Si | -1.077510 | 1.353275  | -3.974377 |
| O  | -0.503691 | -0.134245 | -3.352339 |
| O  | 4.456242  | 0.974786  | -2.975113 |
| O  | 1.250308  | -2.825437 | 1.180308  |
| O  | -2.565074 | 1.600709  | 0.180595  |
| O  | -0.171854 | 0.104065  | 3.046865  |
| O  | 1.418725  | 2.633056  | 0.247561  |
| C  | -0.095866 | -0.663481 | -2.166063 |
| C  | -1.021731 | -1.435124 | -1.390752 |
| C  | -0.559012 | -2.176943 | -0.266514 |
| C  | 0.822406  | -2.078128 | 0.100153  |
| C  | 1.742397  | -1.251501 | -0.601253 |
| C  | 3.250369  | -1.241173 | -0.322760 |
| H  | 3.652103  | -2.075563 | -0.928602 |
| C  | 3.917373  | 0.045171  | -0.860400 |
| H  | 3.675517  | 0.895127  | -0.200041 |
| H  | 5.008710  | -0.077395 | -0.831268 |
| C  | 3.483245  | 0.369809  | -2.252709 |
| C  | 2.222283  | 0.099888  | -2.670725 |
| H  | 1.870065  | 0.379147  | -3.659152 |
| C  | 1.282576  | -0.581182 | -1.795319 |
| C  | 4.136832  | 1.364639  | -4.326452 |
| H  | 3.851075  | 0.486504  | -4.923541 |
| H  | 5.050572  | 1.811767  | -4.729566 |
| H  | 3.324893  | 2.106414  | -4.331837 |
| C  | 1.779988  | -4.116968 | 0.796386  |
| H  | 1.024927  | -4.709199 | 0.256554  |
| H  | 2.048225  | -4.620717 | 1.730971  |
| H  | 2.675128  | -4.009840 | 0.167129  |

|   |           |           |           |
|---|-----------|-----------|-----------|
| C | -1.477611 | -3.129819 | 0.482777  |
| H | -0.861344 | -3.917540 | 0.932339  |
| H | -2.123603 | -3.629485 | -0.253159 |
| C | -2.350706 | -2.516762 | 1.588530  |
| H | -1.732406 | -2.118109 | 2.402211  |
| H | -3.013280 | -3.287859 | 2.008475  |
| H | -2.977343 | -1.697772 | 1.210199  |
| C | -2.444229 | -1.584010 | -1.879232 |
| H | -2.781693 | -0.635987 | -2.311106 |
| H | -3.107967 | -1.794132 | -1.031786 |
| C | -2.572917 | -2.697530 | -2.935227 |
| H | -1.945994 | -2.483461 | -3.811084 |
| H | -3.615625 | -2.780623 | -3.272431 |
| H | -2.268988 | -3.674424 | -2.532554 |
| C | -2.862935 | 1.660205  | -3.469328 |
| H | -3.548919 | 0.879362  | -3.825866 |
| H | -3.191112 | 2.616399  | -3.906391 |
| H | -2.969212 | 1.748997  | -2.379282 |
| C | -0.029068 | 2.782751  | -3.355856 |
| H | 0.037059  | 2.765609  | -2.258931 |
| H | -0.501738 | 3.733543  | -3.645513 |
| H | 0.993135  | 2.774461  | -3.756230 |
| C | -0.945878 | 1.096724  | -5.865936 |
| C | 0.509343  | 0.805958  | -6.280962 |
| H | 0.888255  | -0.118447 | -5.820378 |
| H | 1.187615  | 1.630769  | -6.014038 |
| H | 0.570059  | 0.677673  | -7.375829 |
| C | -1.421061 | 2.388084  | -6.567627 |
| H | -1.353104 | 2.264065  | -7.662354 |
| H | -0.803072 | 3.258009  | -6.297693 |
| H | -2.468463 | 2.628034  | -6.330640 |
| C | -1.837896 | -0.079790 | -6.311053 |
| H | -2.897949 | 0.089833  | -6.070412 |
| H | -1.529433 | -1.025557 | -5.841610 |
| H | -1.766052 | -0.212623 | -7.404733 |
| C | 3.745620  | -1.455428 | 1.102895  |
| C | 3.361501  | -0.615536 | 2.158431  |
| H | 2.610168  | 0.156194  | 1.987478  |
| C | 3.916105  | -0.767919 | 3.430577  |
| H | 3.597277  | -0.109576 | 4.240577  |
| C | 4.877249  | -1.757044 | 3.669031  |
| H | 5.311300  | -1.874000 | 4.663433  |
| C | 5.281226  | -2.587848 | 2.621196  |
| H | 6.036699  | -3.357381 | 2.790058  |
| C | 4.720971  | -2.432339 | 1.348859  |
| H | 5.051864  | -3.078969 | 0.532226  |

|   |           |          |          |
|---|-----------|----------|----------|
| C | -1.572225 | 0.972615 | 0.108164 |
| C | -0.107776 | 0.041060 | 1.875072 |
| C | 0.864345  | 1.599614 | 0.159813 |

### ACOYEW<sup>6</sup>

( $\eta^6$ -8-ethylidene-3,4-dimethoxy-5-methyl-2-trimethylsilyl-5,6,7,8-tetrahydronaphthyl)-tricarbonyl-chromium(0)

Charge = 0

Spin Multiplicity = 1

|    |           |           |           |
|----|-----------|-----------|-----------|
| Cr | -0.025874 | 0.035604  | 0.052380  |
| Si | -2.102300 | -2.985732 | 1.115843  |
| C  | -0.403468 | 1.370340  | -3.129423 |
| C  | 1.079713  | 1.225225  | -3.497762 |
| C  | 1.424171  | -0.186501 | -3.975511 |
| C  | 0.874212  | -1.292368 | -3.086177 |
| C  | -0.485968 | -1.832617 | -1.005890 |
| C  | -1.568895 | -1.614555 | -0.116827 |
| C  | -2.274978 | -0.380910 | -0.243592 |
| C  | -1.851408 | 0.616704  | -1.170395 |
| C  | -0.778544 | 0.340450  | -2.084043 |
| C  | -0.131859 | -0.931713 | -2.059728 |
| C  | 1.208636  | -2.587562 | -3.292734 |
| C  | 2.159420  | -3.106062 | -4.324874 |
| C  | -1.336970 | 1.250469  | -4.352943 |
| C  | -2.630474 | 2.669861  | -0.158192 |
| C  | -4.627057 | -0.055148 | -0.120611 |
| C  | -0.769123 | -4.322003 | 1.084233  |
| C  | -3.724311 | -3.719304 | 0.483398  |
| C  | -2.310388 | -2.353515 | 2.875727  |
| C  | 1.551414  | -0.707676 | 0.586687  |
| C  | -0.358821 | 0.468732  | 1.793713  |
| C  | 0.866971  | 1.622856  | -0.052424 |
| O  | -2.502501 | 1.814090  | -1.322680 |
| O  | -3.358224 | -0.170119 | 0.580621  |
| O  | 2.571782  | -1.171645 | 0.934573  |
| O  | -0.547833 | 0.776198  | 2.909922  |
| O  | 1.461729  | 2.635317  | -0.090867 |
| H  | -0.562979 | 2.364753  | -2.689235 |
| H  | 1.689661  | 1.478377  | -2.618593 |
| H  | 1.333896  | 1.953211  | -4.282735 |
| H  | 1.040151  | -0.333712 | -4.998584 |
| H  | 2.517189  | -0.286961 | -4.052665 |
| H  | 0.086320  | -2.751423 | -0.900962 |

|   |           |           |           |
|---|-----------|-----------|-----------|
| H | 0.733931  | -3.359560 | -2.682103 |
| H | 1.624153  | -3.718297 | -5.070780 |
| H | 2.903974  | -3.773742 | -3.861916 |
| H | 2.693319  | -2.312609 | -4.861109 |
| H | -1.064393 | 2.004380  | -5.105831 |
| H | -2.383625 | 1.417694  | -4.064925 |
| H | -1.269532 | 0.258424  | -4.822026 |
| H | -3.288484 | 2.228837  | 0.600915  |
| H | -3.057920 | 3.605222  | -0.534573 |
| H | -1.636896 | 2.850577  | 0.275267  |
| H | -4.645616 | 0.827304  | -0.773558 |
| H | -5.385894 | 0.039885  | 0.662859  |
| H | -4.815484 | -0.960383 | -0.715879 |
| H | 0.216101  | -3.929404 | 1.375096  |
| H | -0.675922 | -4.799685 | 0.097899  |
| H | -1.039199 | -5.108436 | 1.806037  |
| H | -3.993742 | -4.598540 | 1.089120  |
| H | -3.636043 | -4.044640 | -0.563616 |
| H | -4.552596 | -3.000280 | 0.552219  |
| H | -2.672796 | -3.174765 | 3.513483  |
| H | -3.035199 | -1.530538 | 2.925687  |
| H | -1.356746 | -1.998519 | 3.289887  |

## ACOYIA<sup>6</sup>

( $\eta^6$ -8-(3-cyanoprop-2-yl)-3,4-dimethoxy-5-methyl-2-trimethylsilyl-5,6,7,8-tetrahydronaphthyl)-tricarbonyl-chromium(0)

Charge = 0

Spin Multiplicity = 1

|    |           |           |           |
|----|-----------|-----------|-----------|
| Cr | 0.027854  | 0.012307  | 0.010525  |
| C  | 1.736216  | -1.683255 | -2.556308 |
| C  | 2.046249  | -0.521581 | -3.509564 |
| C  | 0.829193  | -0.161385 | -4.365214 |
| C  | -0.398916 | 0.272726  | -3.531139 |
| C  | -1.660117 | -0.277140 | -1.392387 |
| C  | -1.953325 | -1.057239 | -0.250101 |
| C  | -0.984004 | -2.019249 | 0.157322  |
| C  | 0.239666  | -2.171609 | -0.562891 |
| C  | 0.479546  | -1.402593 | -1.752518 |
| C  | -0.492960 | -0.459008 | -2.189373 |
| C  | -0.597864 | 1.821159  | -3.462562 |
| C  | 0.693669  | 2.565241  | -3.036189 |
| C  | 0.493093  | 4.000748  | -2.876879 |
| C  | -1.128229 | 2.356052  | -4.799560 |

|   |           |           |           |
|---|-----------|-----------|-----------|
| C | 1.598845  | -3.026256 | -3.308744 |
| C | 1.708268  | -3.130617 | 1.112170  |
| C | -1.620318 | -4.159735 | 0.926755  |
| C | -3.254651 | -0.907164 | 0.489724  |
| C | -0.422111 | 1.774487  | 0.140685  |
| C | 0.058795  | 0.017329  | 1.832579  |
| C | 1.791030  | 0.485826  | 0.045021  |
| N | 0.332114  | 5.147820  | -2.764616 |
| O | 1.171183  | -3.119363 | -0.236252 |
| O | -1.246505 | -2.794354 | 1.262030  |
| O | -0.718986 | 2.903490  | 0.261694  |
| O | 0.074398  | 0.036143  | 3.005620  |
| O | 2.922418  | 0.798823  | 0.076055  |
| H | 2.567206  | -1.793033 | -1.844259 |
| H | 2.381785  | 0.347926  | -2.924667 |
| H | 2.887950  | -0.806043 | -4.158727 |
| H | 1.088784  | 0.630404  | -5.082818 |
| H | 0.553923  | -1.031363 | -4.979059 |
| H | -1.294163 | -0.076356 | -4.074605 |
| H | -2.395408 | 0.467323  | -1.698668 |
| H | 1.065362  | 2.168079  | -2.078343 |
| H | 1.489629  | 2.429135  | -3.784831 |
| H | -1.356805 | 2.030187  | -2.693741 |
| H | -1.305774 | 3.439213  | -4.747629 |
| H | -2.079580 | 1.870228  | -5.058083 |
| H | -0.418876 | 2.172515  | -5.620396 |
| H | 1.439751  | -3.856103 | -2.609363 |
| H | 2.520585  | -3.226395 | -3.873935 |
| H | 0.759535  | -3.013189 | -4.018214 |
| H | 2.048362  | -2.119997 | 1.378962  |
| H | 2.557525  | -3.820993 | 1.074640  |
| H | 0.966229  | -3.476036 | 1.841467  |
| H | -2.527572 | -4.167140 | 0.305482  |
| H | -1.821272 | -4.653099 | 1.883355  |
| H | -0.802596 | -4.673295 | 0.401857  |
| H | -3.688960 | 0.082839  | 0.305749  |
| H | -3.122772 | -1.047160 | 1.568414  |
| H | -3.976030 | -1.663204 | 0.141310  |

## ACTPCR<sup>7</sup>

Acetophenone tricarbonyl chromium(0)

Charge = 0

Spin Multiplicity = 1

|    |           |           |           |
|----|-----------|-----------|-----------|
| Cr | 1.232503  | 2.160003  | 2.399706  |
| C  | 1.059723  | -0.060538 | 2.049337  |
| C  | 2.728736  | 2.154605  | 3.458208  |
| C  | 0.243937  | 2.494509  | 3.913488  |
| C  | 2.152442  | 0.448171  | 1.298204  |
| C  | -0.429897 | 1.610982  | 1.005189  |
| C  | -0.209738 | 0.533594  | 1.917482  |
| C  | 0.679121  | 2.097670  | 0.256082  |
| C  | 1.957200  | 1.499183  | 0.374144  |
| C  | 1.469362  | 3.970262  | 2.221753  |
| C  | -1.797757 | 2.219923  | 0.923185  |
| C  | -2.004110 | 3.427251  | 0.041325  |
| O  | -2.728264 | 1.710807  | 1.548793  |
| O  | 1.623159  | 5.124258  | 2.116712  |
| O  | 3.682248  | 2.160787  | 4.134467  |
| O  | -0.374106 | 2.713994  | 4.879254  |
| H  | 1.216452  | -0.860266 | 2.770665  |
| H  | 3.147265  | 0.028291  | 1.437335  |
| H  | -1.047872 | 0.191593  | 2.522423  |
| H  | 0.554339  | 2.944534  | -0.415770 |
| H  | 2.797748  | 1.897092  | -0.190967 |
| H  | -1.307465 | 4.238037  | 0.298631  |
| H  | -3.034682 | 3.780607  | 0.151181  |
| H  | -1.822562 | 3.163172  | -1.012247 |

### ACUDOR<sup>8</sup>

(R)-Tricarbonyl-( $\eta^6$ -1-(methoxymethoxy)-2-(hydroxy(diphenyl)methyl)benzene)-chromium(0)

Charge = 0

Spin Multiplicity = 1

|    |           |           |           |
|----|-----------|-----------|-----------|
| Cr | 1.430001  | 3.270966  | -3.532281 |
| C  | 1.873588  | 1.117889  | -2.852953 |
| C  | 1.612038  | 1.923756  | -1.690204 |
| C  | 0.397166  | 2.651972  | -1.663952 |
| H  | 0.186261  | 3.277674  | -0.799043 |
| C  | -0.544362 | 2.598265  | -2.723392 |
| H  | -1.459287 | 3.184406  | -2.671728 |
| C  | -0.236726 | 1.844652  | -3.871650 |
| H  | -0.919479 | 1.828751  | -4.719184 |
| C  | 0.967846  | 1.095633  | -3.939178 |
| H  | 1.180740  | 0.502077  | -4.823501 |
| O  | 3.032913  | 0.392834  | -2.832218 |
| C  | 3.477951  | -0.270931 | -4.060570 |
| H  | 3.396257  | 0.433618  | -4.898285 |

|   |          |           |           |
|---|----------|-----------|-----------|
| H | 4.527154 | -0.513512 | -3.836817 |
| O | 2.729274 | -1.395300 | -4.377053 |
| C | 2.959250 | -2.512039 | -3.488051 |
| H | 2.404416 | -3.357857 | -3.907543 |
| H | 2.589424 | -2.291271 | -2.476324 |
| H | 4.033451 | -2.752958 | -3.447237 |
| C | 2.578750 | 1.892322  | -0.477680 |
| O | 3.930937 | 2.117825  | -0.916366 |
| H | 4.100491 | 1.447318  | -1.611234 |
| C | 1.321432 | -0.269833 | 0.188406  |
| H | 0.448477 | 0.060058  | -0.376455 |
| C | 1.265454 | -1.490483 | 0.871188  |
| H | 0.356079 | -2.092113 | 0.825606  |
| C | 2.366837 | -1.937398 | 1.604268  |
| H | 2.325077 | -2.890076 | 2.134693  |
| C | 3.524717 | -1.153384 | 1.651446  |
| H | 4.391642 | -1.491144 | 2.222184  |
| C | 3.579004 | 0.064402  | 0.970476  |
| H | 4.484671 | 0.670159  | 1.005480  |
| C | 2.478968 | 0.519577  | 0.227485  |
| C | 1.397607 | 2.855806  | 1.593245  |
| H | 0.928520 | 1.886198  | 1.763470  |
| C | 1.122859 | 3.911952  | 2.467758  |
| H | 0.440207 | 3.754719  | 3.304490  |
| C | 1.726975 | 5.157564  | 2.277793  |
| H | 1.518657 | 5.980196  | 2.963795  |
| C | 2.603720 | 5.339350  | 1.204053  |
| H | 3.082470 | 6.307164  | 1.045975  |
| C | 2.872055 | 4.286291  | 0.325735  |
| H | 3.557484 | 4.431928  | -0.507341 |
| C | 2.273489 | 3.031022  | 0.512143  |
| C | 3.219078 | 3.510545  | -3.840408 |
| O | 4.356815 | 3.679638  | -4.062518 |
| C | 1.347090 | 5.010436  | -2.976126 |
| O | 1.284837 | 6.134299  | -2.651597 |
| C | 1.131240 | 3.892835  | -5.223666 |
| O | 0.941516 | 4.302891  | -6.305153 |

### ACUDUX<sup>8</sup>

(R)-Tricarbonyl-( $\eta^6$ -1-(methoxymethoxy)-2-(bis(4-methoxyphenyl)hydroxymethyl)benzene)-chromium(0)

Charge = 0

Spin Multiplicity = 1

|    |            |           |           |
|----|------------|-----------|-----------|
| Cr | -0.920450  | 3.682783  | 10.804530 |
| C  | -2.944505  | 2.598131  | 11.016520 |
| C  | -2.656441  | 3.303296  | 12.238085 |
| C  | -2.381289  | 4.687994  | 12.140211 |
| H  | -2.158945  | 5.236111  | 13.053788 |
| C  | -2.378840  | 5.376392  | 10.897838 |
| H  | -2.144211  | 6.438082  | 10.862705 |
| C  | -2.599281  | 4.650447  | 9.713747  |
| H  | -2.543317  | 5.144960  | 8.745680  |
| C  | -2.877463  | 3.256645  | 9.767491  |
| H  | -3.005501  | 2.695709  | 8.845645  |
| O  | -3.266393  | 1.274518  | 11.140400 |
| C  | -3.911628  | 0.599486  | 10.012362 |
| H  | -4.371920  | -0.278936 | 10.488560 |
| H  | -4.667007  | 1.273371  | 9.588529  |
| O  | -3.039654  | 0.250561  | 8.991089  |
| C  | -2.176577  | -0.862951 | 9.314684  |
| H  | -1.644503  | -1.116678 | 8.391990  |
| H  | -2.775486  | -1.725280 | 9.648616  |
| H  | -1.452085  | -0.587716 | 10.093717 |
| C  | -2.787202  | 2.594334  | 13.611803 |
| O  | -2.072834  | 1.340925  | 13.589403 |
| H  | -2.438889  | 0.834643  | 12.834131 |
| C  | -4.280033  | 2.342499  | 13.911019 |
| C  | -5.307708  | 3.144651  | 13.405982 |
| H  | -5.078934  | 3.983096  | 12.746711 |
| C  | -6.651299  | 2.907303  | 13.725695 |
| H  | -7.420020  | 3.555245  | 13.307483 |
| C  | -6.983712  | 1.841726  | 14.571975 |
| C  | -5.959984  | 1.030400  | 15.092243 |
| H  | -6.224753  | 0.203663  | 15.753626 |
| C  | -4.632844  | 1.283180  | 14.765654 |
| H  | -3.849239  | 0.644014  | 15.173125 |
| O  | -8.260130  | 1.511241  | 14.946557 |
| C  | -9.329355  | 2.328490  | 14.440091 |
| H  | -10.248035 | 1.903354  | 14.858058 |
| H  | -9.371404  | 2.290152  | 13.340542 |
| H  | -9.221654  | 3.372924  | 14.771143 |
| C  | -2.126287  | 3.411651  | 14.731637 |
| C  | -2.854172  | 4.262466  | 15.568803 |
| H  | -3.934678  | 4.349152  | 15.449353 |
| C  | -2.232230  | 5.011468  | 16.575802 |
| H  | -2.837672  | 5.659486  | 17.207360 |
| C  | -0.847233  | 4.906679  | 16.760950 |
| C  | -0.102821  | 4.053110  | 15.927909 |



|   |           |          |           |
|---|-----------|----------|-----------|
| H | 0.974932  | 3.974494 | 16.078822 |
| C | -0.735818 | 3.323321 | 14.928401 |
| H | -0.146929 | 2.663099 | 14.293674 |
| O | -0.135385 | 5.582138 | 17.717090 |
| C | -0.868302 | 6.460103 | 18.589280 |
| H | -1.361927 | 7.263103 | 18.020795 |
| H | -0.123158 | 6.892223 | 19.265340 |
| H | -1.617733 | 5.903785 | 19.172920 |
| C | -0.042431 | 2.111181 | 11.136635 |
| O | 0.545969  | 1.114708 | 11.319486 |
| C | 0.439725  | 4.564445 | 11.645132 |
| O | 1.322553  | 5.138742 | 12.159563 |
| C | 0.055221  | 3.797590 | 9.264326  |
| O | 0.687590  | 3.869238 | 8.279904  |

### ADOPAL01<sup>9</sup>

Dioxo-(N,N'-bis(2,6-diisopropylphenyl)pent-2-en-2-amido-4-imido)-chromium(V)

Charge = 0

Spin Multiplicity = 2

|    |          |           |          |
|----|----------|-----------|----------|
| Cr | 7.114810 | 14.318872 | 3.400250 |
| O  | 8.094435 | 15.421208 | 4.043569 |
| O  | 5.802292 | 14.806406 | 2.609655 |
| N  | 6.633568 | 12.977258 | 4.727556 |
| N  | 8.135092 | 13.086309 | 2.293910 |
| C  | 6.420544 | 10.707557 | 5.699868 |
| H  | 5.861469 | 11.207837 | 6.495773 |
| H  | 7.280360 | 10.185735 | 6.143534 |
| H  | 5.780580 | 9.938803  | 5.243761 |
| C  | 6.899871 | 11.664432 | 4.633187 |
| C  | 7.626908 | 11.102968 | 3.573046 |
| H  | 7.769947 | 10.023979 | 3.612959 |
| C  | 8.224980 | 11.760830 | 2.488243 |
| C  | 9.003710 | 10.897629 | 1.523436 |
| H  | 9.444836 | 11.473108 | 0.704562 |
| H  | 8.342851 | 10.126900 | 1.101839 |
| H  | 9.805812 | 10.372055 | 2.060843 |
| C  | 5.912841 | 13.534857 | 5.850259 |
| C  | 4.500500 | 13.649595 | 5.785595 |
| C  | 3.835862 | 14.224556 | 6.877836 |
| H  | 2.748795 | 14.318316 | 6.850344 |
| C  | 4.532362 | 14.673937 | 7.997942 |
| H  | 3.993354 | 15.117869 | 8.836745 |
| C  | 5.920202 | 14.553290 | 8.043111 |

|   |           |           |           |
|---|-----------|-----------|-----------|
| H | 6.459806  | 14.904502 | 8.924487  |
| C | 6.639235  | 13.989196 | 6.980795  |
| C | 3.682770  | 13.147339 | 4.600887  |
| H | 4.383056  | 12.824889 | 3.818812  |
| C | 2.818153  | 11.933478 | 4.996895  |
| H | 2.276400  | 11.550958 | 4.118910  |
| H | 2.073001  | 12.209866 | 5.758264  |
| H | 3.426572  | 11.114095 | 5.404790  |
| C | 2.805435  | 14.259440 | 3.997728  |
| H | 2.271190  | 13.878985 | 3.114484  |
| H | 3.417069  | 15.115031 | 3.682359  |
| H | 2.051251  | 14.613134 | 4.716740  |
| C | 8.154273  | 13.865030 | 7.093280  |
| H | 8.534762  | 13.494353 | 6.131828  |
| C | 8.822289  | 15.227119 | 7.355042  |
| H | 8.574317  | 15.943669 | 6.560965  |
| H | 9.915913  | 15.110529 | 7.380799  |
| H | 8.509609  | 15.650470 | 8.321384  |
| C | 8.550333  | 12.849523 | 8.183935  |
| H | 8.105418  | 11.860967 | 8.002479  |
| H | 8.221358  | 13.188628 | 9.177971  |
| H | 9.643842  | 12.731093 | 8.213652  |
| C | 8.783630  | 13.747302 | 1.183782  |
| C | 8.081108  | 13.910066 | -0.037690 |
| C | 8.726012  | 14.586212 | -1.082699 |
| H | 8.204830  | 14.719007 | -2.032426 |
| C | 10.017230 | 15.089004 | -0.935454 |
| H | 10.499143 | 15.612353 | -1.763118 |
| C | 10.691098 | 14.920715 | 0.273066  |
| H | 11.703045 | 15.315098 | 0.381356  |
| C | 10.097136 | 14.255325 | 1.353725  |
| C | 6.678793  | 13.356899 | -0.265867 |
| H | 6.313339  | 12.956572 | 0.689211  |
| C | 5.693652  | 14.455014 | -0.706638 |
| H | 5.650814  | 15.264751 | 0.033649  |
| H | 4.682569  | 14.033480 | -0.808292 |
| H | 5.975575  | 14.883319 | -1.680244 |
| C | 6.695377  | 12.204861 | -1.290774 |
| H | 7.372530  | 11.395125 | -0.984785 |
| H | 7.022068  | 12.560448 | -2.279795 |
| H | 5.685936  | 11.781297 | -1.401687 |
| C | 10.887143 | 14.083234 | 2.646010  |
| H | 10.215387 | 13.642534 | 3.395061  |
| C | 12.074991 | 13.120298 | 2.448463  |
| H | 11.747832 | 12.139118 | 2.076598  |
| H | 12.600918 | 12.965353 | 3.402453  |

|   |           |           |          |
|---|-----------|-----------|----------|
| H | 12.798953 | 13.528842 | 1.727123 |
| C | 11.373461 | 15.432510 | 3.205468 |
| H | 10.528501 | 16.111159 | 3.381289 |
| H | 12.081533 | 15.922284 | 2.520296 |
| H | 11.891390 | 15.276847 | 4.163497 |

### AESCRI<sup>10</sup>

Charge = 1

Spin Multiplicity = 4

|    |           |           |           |
|----|-----------|-----------|-----------|
| Cr | -2.409531 | 2.727813  | 2.658123  |
| C  | -0.397717 | 4.878465  | 2.637696  |
| C  | -3.708724 | 2.569703  | -0.014917 |
| C  | -3.405773 | 1.133363  | 0.389468  |
| C  | -1.444238 | 0.197525  | 1.405316  |
| C  | -0.392979 | 0.047824  | 2.370449  |
| C  | 0.508872  | -1.033390 | 2.197012  |
| C  | 1.533987  | -1.274798 | 3.094811  |
| C  | 1.674528  | -0.426105 | 4.211177  |
| C  | 0.807859  | 0.638019  | 4.415498  |
| C  | -0.246908 | 0.914666  | 3.508236  |
| C  | -1.625301 | 5.503579  | 3.285797  |
| C  | -3.144613 | 4.563070  | 4.886785  |
| C  | -4.037685 | 3.602514  | 5.467004  |
| C  | -4.638548 | 3.931256  | 6.709348  |
| C  | -5.530835 | 3.076501  | 7.332438  |
| C  | -5.850753 | 1.854009  | 6.708325  |
| C  | -5.284025 | 1.500714  | 5.492019  |
| C  | -4.361317 | 2.353410  | 4.834123  |
| N  | -2.325939 | 1.155479  | 1.388105  |
| N  | -0.867731 | 3.828212  | 1.681339  |
| N  | -2.484291 | 4.413156  | 3.774366  |
| N  | -3.860340 | 3.374299  | 1.234343  |
| O  | -1.041904 | 1.936303  | 3.764362  |
| O  | -3.865443 | 1.967380  | 3.674095  |
| H  | 0.212405  | 5.638004  | 2.129618  |
| H  | 0.216576  | 4.377636  | 3.395589  |
| H  | -4.612045 | 2.621173  | -0.638789 |
| H  | -2.870842 | 2.990124  | -0.587232 |
| H  | -3.135378 | 0.522334  | -0.484574 |
| H  | -4.297501 | 0.683963  | 0.857767  |
| H  | 0.373364  | -1.683617 | 1.329470  |
| H  | 2.218217  | -2.109680 | 2.944809  |
| H  | 2.474964  | -0.607125 | 4.931237  |
| H  | 0.915893  | 1.288910  | 5.284448  |

|   |           |           |          |
|---|-----------|-----------|----------|
| H | -2.187281 | 6.089051  | 2.537828 |
| H | -1.339652 | 6.186475  | 4.099721 |
| H | -4.378857 | 4.886831  | 7.171153 |
| H | -5.980646 | 3.344083  | 8.288396 |
| H | -6.554553 | 1.170233  | 7.186993 |
| H | -5.533225 | 0.552999  | 5.012284 |
| H | -1.503060 | -0.575886 | 0.626033 |
| H | -3.019252 | 5.505043  | 5.439880 |
| H | -4.766258 | 3.165238  | 1.669339 |
| H | -3.885658 | 4.372990  | 1.008333 |
| H | -1.170924 | 4.273585  | 0.808657 |
| H | -0.080739 | 3.226018  | 1.419747 |

### AFEHIC<sup>11</sup>

Dichloro-oxo-( $\eta^5$ -pentamethylcyclopentadienyl)-chromium(V)

Charge = 0

Spin Multiplicity = 2

|    |           |           |           |
|----|-----------|-----------|-----------|
| Cr | -0.013803 | 0.003998  | 0.026226  |
| Cl | -1.296500 | 1.755267  | -0.551104 |
| Cl | -1.523469 | -1.542129 | -0.591184 |
| O  | -0.028755 | -0.010732 | 1.606125  |
| C  | 2.219319  | -0.097109 | 0.163887  |
| C  | 1.755107  | -1.250032 | -0.546543 |
| C  | 1.243138  | -0.810028 | -1.836391 |
| C  | 1.309995  | 0.594425  | -1.876103 |
| C  | 1.868394  | 1.053647  | -0.613202 |
| C  | 2.923267  | -0.094899 | 1.480272  |
| H  | 4.009266  | -0.186181 | 1.320314  |
| H  | 2.606999  | -0.934872 | 2.111177  |
| H  | 2.744684  | 0.834465  | 2.034913  |
| C  | 1.911729  | -2.675754 | -0.129399 |
| H  | 2.808334  | -3.106109 | -0.605039 |
| H  | 1.050475  | -3.281209 | -0.439416 |
| H  | 2.031826  | -2.772154 | 0.956343  |
| C  | 0.797632  | -1.721123 | -2.929489 |
| H  | 1.679335  | -2.120449 | -3.457216 |
| H  | 0.172292  | -1.201799 | -3.665325 |
| H  | 0.230917  | -2.574989 | -2.537340 |
| C  | 0.941961  | 1.482317  | -3.016879 |
| H  | 1.851862  | 1.778458  | -3.564244 |
| H  | 0.450441  | 2.400307  | -2.670232 |
| H  | 0.272974  | 0.980192  | -3.725928 |
| C  | 2.176644  | 2.477394  | -0.284808 |

|   |          |          |           |
|---|----------|----------|-----------|
| H | 3.108049 | 2.779649 | -0.791366 |
| H | 2.319029 | 2.627900 | 0.791993  |
| H | 1.379831 | 3.149258 | -0.628091 |

### AFUCAG<sup>12</sup>

Chloro-(N,N'-bis(3,5-di-*t*-butylsalicylidene)-1,2-phenylenediamine-N,N',O,O')-(oxetane-O)-chromium(III) dichloromethane *n*-pentane solvate

Charge = 0

Spin Multiplicity = 4

|    |           |           |           |
|----|-----------|-----------|-----------|
| Cr | 10.720540 | 7.989247  | 3.383225  |
| Cl | 11.164126 | 9.854588  | 2.084401  |
| O  | 8.952621  | 8.615305  | 3.896127  |
| O  | 11.636196 | 8.723121  | 4.928198  |
| O  | 10.370516 | 6.220985  | 4.478990  |
| N  | 9.951712  | 7.001044  | 1.802273  |
| N  | 12.415155 | 7.095252  | 2.752437  |
| C  | 7.669460  | 7.878095  | 1.994629  |
| C  | 7.821979  | 8.600012  | 3.232872  |
| C  | 6.671801  | 9.298384  | 3.751872  |
| C  | 5.485235  | 9.227925  | 3.029603  |
| H  | 4.621113  | 9.759996  | 3.426355  |
| C  | 5.309753  | 8.520048  | 1.811524  |
| C  | 6.415970  | 7.858453  | 1.319919  |
| H  | 6.361166  | 7.292256  | 0.388916  |
| C  | 6.760319  | 10.118099 | 5.054564  |
| C  | 7.170907  | 9.210199  | 6.238463  |
| H  | 8.161612  | 8.771297  | 6.076651  |
| H  | 6.439632  | 8.399240  | 6.379250  |
| H  | 7.201854  | 9.802579  | 7.165889  |
| C  | 7.795424  | 11.254529 | 4.878891  |
| H  | 7.878214  | 11.831002 | 5.813238  |
| H  | 7.479415  | 11.943728 | 4.081009  |
| H  | 8.784756  | 10.857067 | 4.626383  |
| C  | 5.414422  | 10.770082 | 5.425997  |
| H  | 5.542601  | 11.340007 | 6.357960  |
| H  | 4.624294  | 10.023909 | 5.600106  |
| H  | 5.065393  | 11.473168 | 4.654929  |
| C  | 3.938469  | 8.519566  | 1.118054  |
| C  | 3.528473  | 9.971847  | 0.779222  |
| H  | 4.254134  | 10.434207 | 0.093718  |
| H  | 3.465681  | 10.599088 | 1.679829  |
| H  | 2.540707  | 9.984029  | 0.293242  |
| C  | 3.952725  | 7.705738  | -0.187638 |

|   |           |           |           |
|---|-----------|-----------|-----------|
| H | 2.954314  | 7.733119  | -0.648283 |
| H | 4.208445  | 6.650630  | -0.008877 |
| H | 4.667891  | 8.115474  | -0.916380 |
| C | 2.882678  | 7.900212  | 2.063811  |
| H | 1.891729  | 7.907507  | 1.584275  |
| H | 2.802222  | 8.459032  | 3.007155  |
| H | 3.138245  | 6.858149  | 2.307507  |
| C | 8.711925  | 7.121326  | 1.383474  |
| H | 8.417825  | 6.593465  | 0.469076  |
| C | 10.898305 | 6.194773  | 1.126906  |
| C | 12.222030 | 6.243955  | 1.637937  |
| C | 13.224899 | 5.468515  | 1.032037  |
| H | 14.243857 | 5.482417  | 1.416916  |
| C | 12.928967 | 4.661183  | -0.063224 |
| H | 13.717477 | 4.062498  | -0.520476 |
| C | 11.622489 | 4.611887  | -0.567323 |
| H | 11.386208 | 3.974216  | -1.419894 |
| C | 10.615736 | 5.370074  | 0.024669  |
| H | 9.604000  | 5.305888  | -0.373834 |
| C | 13.602576 | 7.311229  | 3.269069  |
| H | 14.468600 | 6.821106  | 2.809697  |
| C | 13.912018 | 8.140339  | 4.389324  |
| C | 12.920383 | 8.831375  | 5.177693  |
| C | 13.378320 | 9.633974  | 6.278880  |
| C | 14.749593 | 9.681307  | 6.534420  |
| H | 15.082396 | 10.292164 | 7.370341  |
| C | 15.738236 | 9.000795  | 5.785298  |
| C | 15.288039 | 8.241913  | 4.719378  |
| H | 15.993931 | 7.692600  | 4.091485  |
| C | 12.386464 | 10.445138 | 7.136341  |
| C | 11.364728 | 9.503911  | 7.817785  |
| H | 11.877700 | 8.778526  | 8.468148  |
| H | 10.772652 | 8.958031  | 7.074888  |
| H | 10.676950 | 10.093193 | 8.443809  |
| C | 11.646898 | 11.465458 | 6.238277  |
| H | 10.919346 | 12.033114 | 6.838744  |
| H | 11.111955 | 10.965386 | 5.423194  |
| H | 12.360125 | 12.181502 | 5.802161  |
| C | 13.092168 | 11.238844 | 8.252757  |
| H | 13.812703 | 11.967762 | 7.852485  |
| H | 13.618700 | 10.582561 | 8.962261  |
| H | 12.335678 | 11.800473 | 8.820378  |
| C | 17.240971 | 9.084552  | 6.110986  |
| C | 18.001504 | 9.653237  | 4.890293  |
| H | 17.868018 | 9.021714  | 4.000398  |
| H | 19.079974 | 9.709490  | 5.105039  |

|   |           |           |          |
|---|-----------|-----------|----------|
| H | 17.647743 | 10.665463 | 4.643902 |
| C | 17.528524 | 9.990627  | 7.321410 |
| H | 17.198673 | 11.025613 | 7.147086 |
| H | 18.611949 | 10.014765 | 7.509710 |
| H | 17.040669 | 9.621626  | 8.235911 |
| C | 17.778374 | 7.669372  | 6.427675 |
| H | 17.263447 | 7.240021  | 7.300149 |
| H | 18.855619 | 7.711560  | 6.651728 |
| H | 17.637423 | 6.984587  | 5.579176 |
| C | 9.081440  | 5.651815  | 4.948082 |
| H | 8.636603  | 5.024056  | 4.166988 |
| H | 8.396576  | 6.457982  | 5.237654 |
| C | 9.798176  | 4.944271  | 6.110876 |
| H | 9.399101  | 5.149520  | 7.109304 |
| H | 9.907813  | 3.864242  | 5.966770 |
| C | 11.047519 | 5.749553  | 5.714374 |
| H | 11.284842 | 6.601933  | 6.362297 |
| H | 11.954806 | 5.188941  | 5.460060 |

### AGOFIM<sup>13</sup>

Trichloro-(1,1-bis(diphenylphosphoryl-O)ethanamine-N)-chromium(III) acetonitrile solvate monohydrate

Charge = 0

Spin Multiplicity = 4

|    |           |           |           |
|----|-----------|-----------|-----------|
| Cr | 16.099124 | 19.633703 | 12.150577 |
| N  | 15.821593 | 17.649121 | 12.983019 |
| H  | 16.425855 | 17.531931 | 13.807802 |
| H  | 14.857895 | 17.524209 | 13.321385 |
| Cl | 17.280336 | 20.278782 | 14.027448 |
| Cl | 16.514961 | 21.525812 | 10.917944 |
| Cl | 14.104076 | 20.372729 | 13.065370 |
| P  | 17.922522 | 17.195526 | 11.505071 |
| P  | 14.966459 | 17.214127 | 10.549435 |
| O  | 17.795682 | 18.719344 | 11.373455 |
| O  | 15.046288 | 18.745148 | 10.593935 |
| C  | 16.157893 | 16.638694 | 11.920824 |
| C  | 15.982855 | 15.191244 | 12.367898 |
| H  | 16.544571 | 15.006960 | 13.292981 |
| H  | 16.329798 | 14.480436 | 11.605166 |
| H  | 14.924970 | 14.978876 | 12.574592 |
| C  | 18.992450 | 16.726654 | 12.898393 |
| C  | 19.653714 | 17.781421 | 13.550914 |
| H  | 19.455276 | 18.810114 | 13.252184 |

|   |           |           |           |
|---|-----------|-----------|-----------|
| C | 20.542124 | 17.507198 | 14.593599 |
| H | 21.049707 | 18.331230 | 15.096187 |
| C | 20.773738 | 16.188888 | 14.991967 |
| H | 21.466322 | 15.978183 | 15.808051 |
| C | 20.115876 | 15.136107 | 14.346322 |
| H | 20.292166 | 14.105472 | 14.655903 |
| C | 19.230160 | 15.398403 | 13.301311 |
| H | 18.733886 | 14.559311 | 12.816125 |
| C | 18.604117 | 16.492723 | 9.986480  |
| C | 19.042200 | 15.161875 | 9.880609  |
| H | 18.939293 | 14.464133 | 10.710513 |
| C | 19.632070 | 14.719494 | 8.696770  |
| H | 19.970300 | 13.685892 | 8.617069  |
| C | 19.799259 | 15.600568 | 7.623247  |
| H | 20.270291 | 15.252657 | 6.702893  |
| C | 19.370265 | 16.926126 | 7.729790  |
| H | 19.505779 | 17.616866 | 6.897016  |
| C | 18.770520 | 17.376738 | 8.906849  |
| H | 18.444405 | 18.412416 | 9.000826  |
| C | 15.334895 | 16.575632 | 8.901110  |
| C | 15.623838 | 15.229358 | 8.622821  |
| H | 15.737233 | 14.498168 | 9.423084  |
| C | 15.781024 | 14.815012 | 7.299752  |
| H | 16.011821 | 13.771009 | 7.086280  |
| C | 15.645015 | 15.734104 | 6.254447  |
| H | 15.764309 | 15.403782 | 5.221726  |
| C | 15.362797 | 17.074607 | 6.530551  |
| H | 15.263378 | 17.794756 | 5.717701  |
| C | 15.208867 | 17.501022 | 7.850558  |
| H | 14.996043 | 18.547278 | 8.070927  |
| C | 13.320990 | 16.606429 | 11.020063 |
| C | 12.490964 | 17.458995 | 11.768858 |
| H | 12.834821 | 18.461609 | 12.038112 |
| C | 11.218918 | 17.025252 | 12.151660 |
| H | 10.575103 | 17.691240 | 12.727493 |
| C | 10.771817 | 15.750658 | 11.793915 |
| H | 9.776746  | 15.417569 | 12.092331 |
| C | 11.594371 | 14.903862 | 11.042638 |
| H | 11.243586 | 13.913066 | 10.751701 |
| C | 12.864548 | 15.327816 | 10.651726 |
| H | 13.483529 | 14.664487 | 10.047806 |

#### **AHEZAO<sup>14</sup>**

(Acetonitrile)-(carbonylbis(1-methylimidazole))-*mer*-trichloro-chromium(III) acetonitrile solvate



Charge = 0  
Spin Multiplicity = 4

|    |          |           |           |
|----|----------|-----------|-----------|
| Cr | 4.868161 | 10.955844 | 0.955377  |
| Cl | 6.035113 | 11.693169 | -0.921236 |
| Cl | 3.542589 | 9.510777  | -0.326872 |
| Cl | 6.062473 | 12.371108 | 2.378951  |
| N  | 3.813178 | 10.293411 | 2.618888  |
| C  | 3.877568 | 9.075953  | 3.197505  |
| N  | 2.914705 | 8.981724  | 4.174749  |
| C  | 2.246633 | 10.171819 | 4.207779  |
| C  | 2.809382 | 10.978658 | 3.239430  |
| C  | 2.625416 | 7.857591  | 5.072603  |
| C  | 4.838704 | 8.006135  | 2.914960  |
| O  | 4.716679 | 6.887685  | 3.441339  |
| N  | 6.191676 | 9.422921  | 1.314125  |
| C  | 5.987633 | 8.313348  | 2.059548  |
| N  | 7.076136 | 7.481794  | 1.943708  |
| C  | 7.975208 | 8.094008  | 1.118585  |
| C  | 7.418705 | 9.295841  | 0.729892  |
| C  | 7.307245 | 6.179511  | 2.578790  |
| N  | 3.508162 | 12.432619 | 0.607000  |
| C  | 2.757983 | 13.265524 | 0.317157  |
| C  | 1.825083 | 14.302793 | -0.060051 |
| H  | 1.439994 | 10.354746 | 4.908590  |
| H  | 2.547356 | 11.993516 | 2.969831  |
| H  | 3.519556 | 7.592618  | 5.645280  |
| H  | 2.299015 | 6.987822  | 4.494597  |
| H  | 1.829594 | 8.179635  | 5.751594  |
| H  | 8.928388 | 7.639251  | 0.875566  |
| H  | 7.809025 | 10.055686 | 0.063774  |
| H  | 7.215260 | 6.268448  | 3.665846  |
| H  | 8.321530 | 5.863803  | 2.314291  |
| H  | 6.578491 | 5.448033  | 2.215614  |
| H  | 2.066197 | 14.659515 | -1.070503 |
| H  | 1.893333 | 15.141040 | 0.646253  |
| H  | 0.802692 | 13.900864 | -0.052670 |

### ALUGOE<sup>15</sup>

tris(2,2,3,4,4-Pentamethylpentan-3-olato)-chromium chloro-tris(2,2,3,4,4-pentamethylpentan-3-olato)-chromium

Charge = 0  
Spin Multiplicity = 3

|    |                   |                   |                  |
|----|-------------------|-------------------|------------------|
| Cr | 11.69761103924882 | 3.44045763727553  | 2.74816749437065 |
| Cl | 11.69671551571495 | 3.48482115780187  | 0.54029067586364 |
| O  | 13.37859917275884 | 3.34210574822351  | 3.30207894413313 |
| O  | 10.92597628795134 | 4.93098888074125  | 3.31306441125502 |
| O  | 10.77816381516626 | 2.01798093148350  | 3.26386797053749 |
| C  | 10.12057005634344 | 7.14683775727209  | 2.58088975546938 |
| C  | 14.66903063043635 | 4.02141979848245  | 3.19660347203815 |
| C  | 14.50198740473240 | 5.24457831524466  | 2.28339090529509 |
| H  | 14.34909274446168 | 4.93978161538644  | 1.24201111348198 |
| H  | 15.37922271825846 | 5.90241835267368  | 2.32580827246467 |
| H  | 13.62956325781727 | 5.83113968580952  | 2.59044777787561 |
| C  | 10.72510455144011 | 0.56497073605433  | 3.12013309293741 |
| C  | 9.04261573548642  | 5.67430839776226  | 4.64923101875658 |
| C  | 10.90024094108045 | 8.02849558033011  | 3.57594933460458 |
| H  | 11.75956778840890 | 7.49446658800867  | 4.00226973162615 |
| H  | 10.27213523411387 | 8.39345895427958  | 4.39899455776666 |
| H  | 11.28371091598526 | 8.91218651272356  | 3.04302218788983 |
| C  | 8.90323021198741  | 7.95711325804878  | 2.07244730217832 |
| H  | 9.27695811477927  | 8.89181024511244  | 1.62679118962129 |
| H  | 8.19873949323297  | 8.23325569755566  | 2.86399500354864 |
| H  | 8.34983277314075  | 7.42426144401831  | 1.28771316800123 |
| C  | 14.98823110539522 | 4.50435482635623  | 4.70167131295980 |
| C  | 9.02317467377740  | 1.12478627891497  | 1.26198443307467 |
| H  | 8.07338969089070  | 0.81625246170877  | 0.80016074140617 |
| H  | 9.80408582997691  | 1.05821344348311  | 0.49457378714972 |
| H  | 8.93277819740874  | 2.17670701187647  | 1.55201320563410 |
| C  | 14.07672200251584 | 5.70300191823810  | 5.05529132947858 |
| H  | 13.02179301505245 | 5.48061303998951  | 4.84871598976360 |
| H  | 14.35641884354372 | 6.61590860205976  | 4.51181778720237 |
| H  | 14.17262466453539 | 5.91915733699338  | 6.12968455957508 |
| C  | 9.69971240002499  | 5.71418673742556  | 3.17826287985806 |
| C  | 15.69039722212140 | 2.99004372794756  | 2.50285422324216 |
| C  | 11.04718109325034 | 0.00541407757935  | 4.59800757746363 |
| C  | 11.83005590660441 | 0.12055201898519  | 2.14949456829185 |
| H  | 11.60453082732353 | 0.42338330041679  | 1.12086420689886 |
| H  | 11.95781314963100 | -0.96936261625941 | 2.17108905161924 |
| H  | 12.78648967361067 | 0.57291154737005  | 2.43180121577428 |
| C  | 16.08007886790237 | 1.80198029688030  | 3.40242066017573 |
| H  | 15.19602064524003 | 1.28576539535864  | 3.79876180450389 |
| H  | 16.71818272633551 | 2.10121672895737  | 4.24412002340361 |
| H  | 16.65152537570365 | 1.07585157294528  | 2.80421220437902 |
| C  | 10.31400819390878 | 0.78452470450352  | 5.71311757510876 |
| H  | 10.64393333154771 | 0.39162708741090  | 6.68686567712173 |
| H  | 9.22513227393074  | 0.68406842226713  | 5.67163566019339 |
| H  | 10.56221720448335 | 1.85255359743307  | 5.67973171233512 |
| C  | 11.03973164668183 | 6.95462905404797  | 1.35299583262142 |

|   |                   |                   |                  |
|---|-------------------|-------------------|------------------|
| H | 11.29347467988186 | 7.94651948368983  | 0.94993502457683 |
| H | 10.56564715571615 | 6.38116393089903  | 0.54653052541100 |
| H | 11.97488685939197 | 6.44956983719328  | 1.61432232708100 |
| C | 14.68982839139935 | 3.42105225733429  | 5.76262870165946 |
| H | 15.29807166932023 | 2.51905586387009  | 5.64408793728122 |
| H | 13.63326929497992 | 3.12716296473047  | 5.74521014576417 |
| H | 14.90585414066718 | 3.83901428180298  | 6.75781801903200 |
| C | 8.76934309826666  | 5.01636511097574  | 2.17512362013398 |
| H | 9.15831994594545  | 5.09108712007944  | 1.15374271751193 |
| H | 7.76267757958851  | 5.45351665780863  | 2.19671620096646 |
| H | 8.67797492855493  | 3.95363696894433  | 2.42059435714043 |
| C | 8.40928966774623  | 4.28368082928174  | 4.89655895254923 |
| H | 8.10748186642086  | 4.21667533693279  | 5.95257156785122 |
| H | 9.11925456069100  | 3.46872069205345  | 4.69910007292927 |
| H | 7.50881766086266  | 4.12179313783235  | 4.28886941770917 |
| C | 9.29567204433842  | 0.21054553969932  | 2.47697226186372 |
| C | 12.55710369071566 | 0.17588288192439  | 4.89127601199132 |
| H | 12.74128876221045 | -0.06002959411520 | 5.94988523338166 |
| H | 12.89007546290292 | 1.20672138646974  | 4.71233046309754 |
| H | 13.18035572441145 | -0.50210991115787 | 4.29243874862254 |
| C | 9.23924864780170  | -1.23925512472216 | 1.93428492714459 |
| H | 9.41195802591243  | -2.00080999150263 | 2.70119094039799 |
| H | 9.95729328425475  | -1.40126516996672 | 1.11917224132222 |
| H | 8.23389023844921  | -1.41226994741781 | 1.52032038245851 |
| C | 15.04659121343396 | 2.38946268949943  | 1.23294311813060 |
| H | 15.77029995985773 | 1.70533975948264  | 0.76473949490056 |
| H | 14.78612855779293 | 3.15270760696273  | 0.48848276195595 |
| H | 14.13992174169892 | 1.81812216419853  | 1.45930637066597 |
| C | 16.44263168782759 | 4.97906129642540  | 4.89672341406779 |
| H | 16.52311723262704 | 5.44721821587416  | 5.89006553004538 |
| H | 16.74118167628251 | 5.73428725426531  | 4.15651763547647 |
| H | 17.16691677549971 | 4.15508875615767  | 4.86672816648309 |
| C | 16.99243637786798 | 3.67973091401181  | 2.02774559274880 |
| H | 17.60708711301431 | 2.92904132593295  | 1.50739255412035 |
| H | 17.59556286988181 | 4.08253243555857  | 2.84756978368979 |
| H | 16.79531580310666 | 4.48904880222450  | 1.31227226916636 |
| C | 10.08134708947933 | 5.86836999570840  | 5.77682476588469 |
| H | 10.60543208667341 | 6.82748782803067  | 5.72799296554618 |
| H | 10.83097325687675 | 5.06807300902363  | 5.76119864908854 |
| H | 9.55871479485303  | 5.82271149811091  | 6.74442547798674 |
| C | 8.11715811371098  | 0.40831805523755  | 3.44962609866920 |
| H | 8.12357063454286  | 1.41271732361280  | 3.89384894600876 |
| H | 8.11262051587982  | -0.33282725382246 | 4.25955567498971 |
| H | 7.17371826765370  | 0.29288075926878  | 2.89442696079327 |
| C | 10.72988053092901 | -1.49402731852589 | 4.76398005070045 |
| H | 11.22151412160223 | -2.11192226063427 | 3.99862081950955 |

|   |                   |                   |                  |
|---|-------------------|-------------------|------------------|
| H | 9.65282637356315  | -1.70517946423704 | 4.74447338318557 |
| H | 11.10922033551956 | -1.82398706004890 | 5.74380467893916 |
| C | 7.91782545033629  | 6.71117979572309  | 4.84055482461572 |
| H | 7.41664038211942  | 6.51064561453068  | 5.80056493477764 |
| H | 7.15225361929806  | 6.64838285499220  | 4.05472515431101 |
| H | 8.29266107369940  | 7.74158199261884  | 4.87867172671487 |

## ALUHAR<sup>15</sup>

Oxo-tris(2,2,3,4,4-pentamethylpentan-3-olato)-chromium(V)

Charge = 0

Spin Multiplicity = 2

|    |           |           |           |
|----|-----------|-----------|-----------|
| Cr | 0.008880  | -0.011230 | -0.049465 |
| O  | -0.006149 | -0.019052 | 1.550846  |
| O  | -1.279336 | -1.104876 | -0.583951 |
| O  | -0.242919 | 1.541951  | -0.876855 |
| O  | 1.558961  | -0.710847 | -0.588763 |
| C  | -3.191772 | 3.735473  | -1.874481 |
| H  | -3.015125 | 4.733711  | -1.459796 |
| H  | -3.933379 | 3.227816  | -1.243202 |
| H  | -3.646215 | 3.867053  | -2.868369 |
| C  | -2.337519 | 1.523691  | -2.594313 |
| H  | -2.972846 | 1.685430  | -3.478106 |
| H  | -2.917383 | 0.936957  | -1.870676 |
| H  | -1.473806 | 0.921052  | -2.898993 |
| C  | -0.962832 | 5.239734  | -0.042747 |
| H  | -1.892140 | 5.184444  | 0.541363  |
| H  | -1.198374 | 5.634844  | -1.039002 |
| H  | -0.310337 | 5.975818  | 0.452127  |
| C  | 1.065686  | 4.105831  | -0.937972 |
| H  | 1.766610  | 4.730689  | -0.364792 |
| H  | 0.875393  | 4.616266  | -1.887190 |
| H  | 1.563823  | 3.155377  | -1.157615 |
| C  | 3.112533  | -1.326531 | 1.946914  |
| H  | 2.015746  | -1.307082 | 1.993351  |
| H  | 3.494502  | -0.414630 | 2.425246  |
| H  | 3.466114  | -2.179855 | 2.544731  |
| C  | -1.757173 | -4.454547 | -2.360055 |
| H  | -2.580053 | -4.967356 | -1.849589 |
| H  | -0.812130 | -4.898688 | -2.019982 |
| H  | -1.850656 | -4.671231 | -3.435244 |
| C  | -3.029440 | -2.372432 | -2.893049 |
| H  | -2.927964 | -2.579041 | -3.969916 |
| H  | -3.126297 | -1.286133 | -2.771034 |

|   |           |           |           |
|---|-----------|-----------|-----------|
| H | -3.959655 | -2.849951 | -2.559138 |
| C | 3.238631  | -2.925426 | 0.066975  |
| H | 3.569290  | -3.624573 | 0.850258  |
| H | 3.708294  | -3.241422 | -0.869371 |
| H | 2.153692  | -3.026722 | -0.037133 |
| C | 0.241217  | 3.575873  | 1.345546  |
| H | 0.969452  | 4.337227  | 1.660907  |
| H | 0.726774  | 2.595042  | 1.423197  |
| H | -0.591403 | 3.603997  | 2.060710  |
| C | -1.040407 | 3.546624  | -3.141884 |
| H | -1.583911 | 3.477495  | -4.096932 |
| H | -0.081415 | 3.026562  | -3.266083 |
| H | -0.845016 | 4.610898  | -2.958651 |
| C | -0.561614 | -2.352703 | -2.925221 |
| H | -0.560405 | -2.755479 | -3.949237 |
| H | 0.394072  | -2.622821 | -2.457283 |
| H | -0.604214 | -1.258384 | -2.990861 |
| C | -3.741789 | -3.926657 | 0.182001  |
| H | -3.082818 | -4.777676 | 0.405338  |
| H | -4.199185 | -4.090295 | -0.802327 |
| H | -4.554751 | -3.940903 | 0.924725  |
| C | 5.163650  | -1.413594 | 0.547918  |
| H | 5.520924  | -2.133546 | 1.300830  |
| H | 5.526901  | -0.421140 | 0.850201  |
| H | 5.636346  | -1.681604 | -0.405783 |
| C | -4.026321 | -1.454654 | -0.043724 |
| H | -4.831674 | -1.481429 | 0.706021  |
| H | -4.492255 | -1.562541 | -1.027856 |
| H | -3.552370 | -0.467055 | 0.009717  |
| C | 3.760452  | -1.516397 | -2.673700 |
| H | 3.978358  | -1.297283 | -3.730585 |
| H | 2.870379  | -2.158387 | -2.643929 |
| H | 4.615361  | -2.079323 | -2.277875 |
| C | -1.784492 | -2.918816 | -2.167484 |
| C | -2.622683 | -2.372073 | 1.769158  |
| H | -3.541982 | -2.282035 | 2.367037  |
| H | -2.031404 | -1.457514 | 1.912838  |
| H | -2.053388 | -3.220212 | 2.172444  |
| C | -0.575696 | -3.340195 | 0.043787  |
| H | 0.285268  | -3.445225 | -0.623687 |
| H | -0.935249 | -4.346362 | 0.294824  |
| H | -0.232274 | -2.858609 | 0.965829  |
| C | 4.843315  | 0.627184  | -1.977462 |
| H | 5.184875  | 0.676672  | -3.022817 |
| H | 5.650542  | 0.177012  | -1.389241 |
| H | 4.702636  | 1.660465  | -1.632736 |

|   |           |           |           |
|---|-----------|-----------|-----------|
| C | 2.497727  | 0.596870  | -2.782464 |
| H | 2.207508  | 1.552592  | -2.328572 |
| H | 1.583934  | 0.013135  | -2.945906 |
| H | 2.944795  | 0.817111  | -3.763693 |
| C | 3.623929  | -1.492044 | 0.492398  |
| C | -2.158377 | 2.306317  | 0.439210  |
| H | -2.878152 | 1.573775  | 0.055256  |
| H | -2.722725 | 3.183639  | 0.779223  |
| H | -1.660047 | 1.864889  | 1.308605  |
| C | -3.011427 | -2.572378 | 0.281970  |
| C | 3.075087  | 1.000508  | 0.292535  |
| H | 2.771119  | 1.825912  | -0.358692 |
| H | 4.103091  | 1.195287  | 0.623353  |
| H | 2.431097  | 1.013526  | 1.178643  |
| C | -1.899929 | 2.898487  | -2.039484 |
| C | -0.214967 | 3.890850  | -0.101076 |
| C | -1.681675 | -2.502301 | -0.618744 |
| C | 3.526724  | -0.185009 | -1.933654 |
| C | -1.131455 | 2.688231  | -0.641479 |
| C | 2.967214  | -0.350519 | -0.431290 |

## ALUHUL<sup>15</sup>

tris(2,2,3,4,4-Pentamethylpentan-3-olato)-(trimethylsilanolato)-chromium(IV) diethyl ether solvate

Charge = 0

Spin Multiplicity = 3

|    |                  |                   |                   |
|----|------------------|-------------------|-------------------|
| Cr | 4.36389845450448 | 4.95620201057431  | 9.56137486741036  |
| Si | 2.45537725020859 | 7.72915036659703  | 8.75821680016842  |
| O  | 4.23943675086221 | 4.57620343287698  | 11.30913308347971 |
| O  | 6.09839268631799 | 5.22941160939128  | 9.18520292457852  |
| O  | 3.82975316487532 | 3.51074090833225  | 8.64387477265038  |
| O  | 3.38291270606094 | 6.39607359813418  | 9.13731774555526  |
| C  | 1.51944178406482 | 3.39704888062213  | 9.41059596791532  |
| H  | 1.70118434547372 | 3.20257596688309  | 10.47337580807216 |
| H  | 0.51582695205080 | 3.02683636962252  | 9.16517699465850  |
| H  | 1.52749757436577 | 4.48271268872938  | 9.26412220927461  |
| C  | 1.63632171940937 | 0.49843971396307  | 9.50093199590822  |
| H  | 0.96836084410149 | 0.33962955089850  | 8.64738445461925  |
| H  | 1.06488532453342 | 0.99716696764125  | 10.29519445581018 |
| H  | 1.92463337894995 | -0.49375083801346 | 9.88090914694167  |
| C  | 3.22358463799965 | 5.42598958178069  | 13.36305290720831 |
| C  | 6.86443327442233 | 5.55209925149011  | 7.98944940442156  |
| C  | 5.88447602545774 | 5.75547992287984  | 6.81986599959931  |

|   |                  |                   |                   |
|---|------------------|-------------------|-------------------|
| H | 5.47061182749543 | 4.79621074878134  | 6.48852829243407  |
| H | 6.36573668707980 | 6.23358619299413  | 5.95696644033581  |
| H | 5.04682481894209 | 6.38627440024504  | 7.13591161304823  |
| C | 2.60166933992606 | 2.73739493702093  | 8.53691599323133  |
| C | 4.60281244389360 | 5.23245051405221  | 12.55525953662670 |
| C | 5.73876761596804 | 4.32052605781175  | 13.24261907554558 |
| C | 5.20731620704764 | 3.02892634505735  | 13.89446553229951 |
| H | 6.06480167449975 | 2.40618478770424  | 14.19421228802792 |
| H | 4.60160285102403 | 2.44336135288840  | 13.19069485349244 |
| H | 4.61425154429615 | 3.21873308711810  | 14.79830322014090 |
| C | 3.42957027861233 | 5.87277363821811  | 14.82520650227898 |
| H | 2.44483635697706 | 6.09709063388056  | 15.26440570911391 |
| H | 4.03509355071710 | 6.78754727400590  | 14.90105780466551 |
| H | 3.89231654038779 | 5.09597322431292  | 15.44729286400069 |
| C | 3.76065544124936 | 0.38036073237039  | 8.19361736539416  |
| H | 4.04822169870196 | -0.52992759240647 | 8.74296328689402  |
| H | 4.68442260526528 | 0.88302764612088  | 7.87771677586929  |
| H | 3.20551948015125 | 0.05896967046550  | 7.30244664893582  |
| C | 3.74773068238284 | 1.41742640983312  | 10.42622269527821 |
| H | 3.86480850998193 | 0.42259664611992  | 10.88259819305148 |
| H | 3.27522007288230 | 2.07528528737660  | 11.16594748653495 |
| H | 4.74669482537317 | 1.81896451078128  | 10.21757334958573 |
| C | 7.60352207787444 | 6.94428665008382  | 8.31388311919414  |
| C | 2.67267693510184 | 8.16219911660500  | 6.93513685974621  |
| H | 3.69569736449763 | 8.49848646906193  | 6.71317740742008  |
| H | 1.98622671628036 | 8.98141118614694  | 6.66817663040298  |
| H | 2.44416324546526 | 7.30578459737353  | 6.28451630524825  |
| C | 7.79609890004091 | 4.27805362637611  | 7.67332080675004  |
| C | 3.33065208336802 | 2.59010208805120  | 6.00818754840386  |
| H | 3.71350720746563 | 1.56521032075532  | 6.02439419265931  |
| H | 4.16456420763789 | 3.27169101584102  | 6.21442696204659  |
| H | 2.97598054341840 | 2.79426783737013  | 4.98621356887220  |
| C | 6.97437965164296 | 2.98458183289241  | 7.86224074636337  |
| H | 7.57526027380785 | 2.13048737647492  | 7.51394055403381  |
| H | 6.03350957825157 | 2.98603051903648  | 7.29885727824275  |
| H | 6.72661016102525 | 2.82280644866979  | 8.91836944012054  |
| C | 2.33400232500886 | 4.16305224033985  | 13.36382316339682 |
| H | 1.35689597288690 | 4.42166598896733  | 13.79996739397444 |
| H | 2.74405400592759 | 3.33631391009949  | 13.95111236746822 |
| H | 2.16192175010827 | 3.80726923312591  | 12.34085498031484 |
| C | 2.92295139425346 | 1.27479582417749  | 9.12875306143422  |
| C | 8.61453080005576 | 7.36504203590830  | 7.22729657261988  |
| H | 8.16683640751020 | 7.39290636543052  | 6.22370382114330  |
| H | 9.49727682026505 | 6.71396280996942  | 7.19579129968549  |
| H | 8.97000844992653 | 8.38261273996262  | 7.45416364524045  |
| C | 6.75068146984088 | 3.86326800690246  | 12.16878761511391 |

|   |                  |                   |                   |
|---|------------------|-------------------|-------------------|
| H | 7.57557051999841 | 3.32827155081657  | 12.66408175397129 |
| H | 7.18410035287768 | 4.69897135419737  | 11.60602293963988 |
| H | 6.28541758158791 | 3.18322124418142  | 11.44511452392324 |
| C | 2.98249631671612 | 9.20647430673886  | 9.80394254509596  |
| H | 2.77377166426576 | 9.04885901756989  | 10.87168342141314 |
| H | 2.42389550456363 | 10.09989749629684 | 9.48212260668614  |
| H | 4.05466963284887 | 9.42083490155327  | 9.68912138020317  |
| C | 1.01968900341846 | 1.86777546960927  | 6.61881183335881  |
| H | 0.69094033564392 | 2.09623474017761  | 5.59288993730118  |
| H | 0.14363061669921 | 1.98054950844544  | 7.27332764714516  |
| H | 1.33189570341250 | 0.81589172209305  | 6.63090553120156  |
| C | 1.66033409797689 | 4.26397550880046  | 6.69743124930809  |
| H | 2.40010397684715 | 5.01578226091975  | 7.00294069824105  |
| H | 0.70906100321664 | 4.48393873659450  | 7.20071560922831  |
| H | 1.49179430255541 | 4.37133237170402  | 5.61530175251301  |
| C | 2.16489327011939 | 2.83236109784466  | 6.99135500236024  |
| C | 8.34260727404139 | 6.94974185594203  | 9.67142743967726  |
| H | 9.28133682888594 | 6.38668243797447  | 9.65667684323871  |
| H | 7.71348208770335 | 6.54274376420597  | 10.47127904944249 |
| H | 8.59036520275837 | 7.98943218974106  | 9.93427267589380  |
| C | 6.54959496176134 | 5.09679718233444  | 14.30829289424683 |
| H | 5.93205406001206 | 5.48940610769793  | 15.12384458158253 |
| H | 7.11032353295943 | 5.93376238441099  | 13.87105274415538 |
| H | 7.28538847592430 | 4.40979071792969  | 14.75410393653137 |
| C | 9.01795053293588 | 4.13448739985766  | 8.60061529942308  |
| H | 8.72990519248483 | 4.18504524938329  | 9.65878546224202  |
| H | 9.79281318512603 | 4.88649208422105  | 8.40520895634833  |
| H | 9.47759081315403 | 3.14829024019798  | 8.42858454748611  |
| C | 8.30084052392219 | 4.27182473014629  | 6.21034873690446  |
| H | 8.89633289747329 | 5.15491114701967  | 5.95319378655550  |
| H | 7.47537971742662 | 4.19378506591439  | 5.49023046703704  |
| H | 8.94240563068075 | 3.38857735976646  | 6.06727646945968  |
| C | 6.54171093034447 | 8.06562229023013  | 8.39898520070882  |
| H | 7.02350332828729 | 8.99098230222947  | 8.74854114099515  |
| H | 5.74518872950574 | 7.80825787243537  | 9.10882564944191  |
| H | 6.08441140319810 | 8.28238098639936  | 7.42428348078109  |
| C | 5.20259144849109 | 6.61309639338929  | 12.23542873756929 |
| H | 6.20085375610634 | 6.51304091587277  | 11.79610521764138 |
| H | 5.28728075782748 | 7.23774102925215  | 13.13388790947734 |
| H | 4.57473794697229 | 7.14350631474254  | 11.51060642367651 |
| C | 2.38522054367937 | 6.52634895544536  | 12.67265959849456 |
| H | 2.24738239094094 | 6.30695092630251  | 11.60628298926317 |
| H | 2.84027523598901 | 7.52081934925714  | 12.76940130769061 |
| H | 1.39159853603156 | 6.57153948368683  | 13.14264188786089 |
| C | 0.63527207091912 | 7.35653054965064  | 9.08191023470551  |
| H | 0.26514170176953 | 6.55166571955037  | 8.43062214186109  |



|   |                  |                  |                   |
|---|------------------|------------------|-------------------|
| H | 0.03324027402160 | 8.25615580095087 | 8.87673236344158  |
| H | 0.45592987774324 | 7.06348617954152 | 10.12635798962358 |

**AMAYAP<sup>16</sup>**

Pentacarbonyl-(3-chloro-3a,4,5,6,6a-pentamethyl-2-phenyl-3,3a,4,6a-tetrahydro-2H-cyclopenta[d][1,3]oxaphosphole)-chromium(0)

Charge = 0

Spin Multiplicity = 1

|    |           |           |           |
|----|-----------|-----------|-----------|
| Cr | 6.103195  | -6.375037 | 2.062530  |
| Cl | 2.886146  | -5.052704 | 0.835655  |
| P  | 3.720620  | -6.504852 | 2.095513  |
| O  | 1.373732  | -6.526445 | 3.271470  |
| O  | 9.097606  | -5.983589 | 2.176923  |
| O  | 5.965713  | -3.468451 | 2.990533  |
| O  | 6.260531  | -7.515723 | 4.888937  |
| O  | 6.753440  | -9.105190 | 0.875623  |
| O  | 6.100019  | -5.377646 | -0.823235 |
| C  | 2.694098  | -6.223912 | 3.671724  |
| H  | 3.100825  | -6.990427 | 4.363782  |
| C  | 1.291629  | -7.761255 | 2.450925  |
| C  | 2.683196  | -8.059354 | 1.758794  |
| C  | 2.762663  | -4.879689 | 4.340312  |
| C  | 3.640577  | -4.686355 | 5.417731  |
| H  | 4.257192  | -5.515473 | 5.770629  |
| C  | 3.720253  | -3.446641 | 6.055960  |
| H  | 4.407279  | -3.312000 | 6.892752  |
| C  | 2.910579  | -2.388562 | 5.632975  |
| H  | 2.965432  | -1.421499 | 6.135382  |
| C  | 2.019777  | -2.579849 | 4.571514  |
| H  | 1.375832  | -1.761691 | 4.244536  |
| C  | 1.944828  | -3.816508 | 3.926638  |
| H  | 1.241587  | -3.966942 | 3.108786  |
| C  | 0.361321  | -7.477681 | 1.288699  |
| C  | 0.945910  | -7.722087 | 0.100517  |
| C  | 2.361220  | -8.246502 | 0.236586  |
| H  | 3.039742  | -7.624947 | -0.375560 |
| C  | 0.768569  | -8.855695 | 3.385530  |
| H  | 1.449899  | -9.028735 | 4.229818  |
| H  | 0.626805  | -9.804217 | 2.849380  |
| H  | -0.202823 | -8.545784 | 3.792972  |
| C  | -1.028142 | -6.983314 | 1.550020  |
| H  | -1.540142 | -6.694363 | 0.623682  |

|   |           |            |           |
|---|-----------|------------|-----------|
| H | -1.009501 | -6.109732  | 2.219490  |
| H | -1.645074 | -7.751080  | 2.044577  |
| C | 0.348881  | -7.543886  | -1.260984 |
| H | -0.642486 | -7.075506  | -1.223320 |
| H | 0.243801  | -8.507464  | -1.785113 |
| H | 1.001937  | -6.915395  | -1.888519 |
| C | 2.494886  | -9.689526  | -0.286772 |
| H | 1.824368  | -10.381217 | 0.243001  |
| H | 3.523782  | -10.063142 | -0.196656 |
| H | 2.231472  | -9.718812  | -1.353049 |
| C | 3.460126  | -9.219805  | 2.398922  |
| H | 2.851692  | -10.133229 | 2.394096  |
| H | 3.731509  | -9.020775  | 3.445374  |
| H | 4.381081  | -9.439200  | 1.850487  |
| C | 7.947120  | -6.136903  | 2.128238  |
| C | 5.959149  | -4.579740  | 2.669392  |
| C | 6.164795  | -7.074333  | 3.820706  |
| C | 6.441950  | -8.090713  | 1.344233  |
| C | 6.070500  | -5.747766  | 0.272466  |

### AMOWEF<sup>17</sup>

bis( $\mu^2$ -chloro)-(bis(2,5-di-*t*-butyl-1H-pyrrol-1-yl))-bis(tetrahydrofuran)-di-chromium

Charge = 0

Spin Multiplicity = 5

|    |           |           |          |
|----|-----------|-----------|----------|
| Cr | 12.697529 | 0.267095  | 1.514740 |
| Cl | 10.435893 | 0.295439  | 0.732343 |
| N  | 12.190133 | 0.706831  | 3.406770 |
| C  | 12.175618 | 1.978166  | 3.987873 |
| C  | 12.069654 | 1.833998  | 5.369762 |
| H  | 12.023886 | 2.639880  | 6.095948 |
| C  | 12.011057 | 0.445528  | 5.651572 |
| H  | 11.915556 | -0.009215 | 6.633288 |
| C  | 12.086234 | -0.229994 | 4.435201 |
| C  | 12.119395 | 3.292591  | 3.211731 |
| C  | 10.662081 | 3.581933  | 2.781478 |
| H  | 10.281911 | 2.793405  | 2.119124 |
| H  | 10.594600 | 4.541008  | 2.244271 |
| H  | 10.003721 | 3.635967  | 3.659404 |
| C  | 12.598271 | 4.449089  | 4.111820 |
| H  | 13.628771 | 4.288760  | 4.457128 |
| H  | 11.958288 | 4.570025  | 4.995850 |
| H  | 12.568044 | 5.396338  | 3.553600 |
| C  | 13.010209 | 3.282335  | 1.956955 |

|    |           |           |           |
|----|-----------|-----------|-----------|
| H  | 12.669355 | 2.526675  | 1.222868  |
| H  | 14.059549 | 3.072417  | 2.199556  |
| H  | 12.962049 | 4.248335  | 1.433432  |
| C  | 11.965043 | -1.744285 | 4.254484  |
| C  | 10.475990 | -2.150793 | 4.385258  |
| H  | 10.080152 | -1.857105 | 5.366333  |
| H  | 10.353968 | -3.239745 | 4.274580  |
| H  | 9.865197  | -1.660238 | 3.614300  |
| C  | 12.770481 | -2.462775 | 5.359095  |
| H  | 12.421710 | -2.178260 | 6.359304  |
| H  | 13.840390 | -2.219406 | 5.294158  |
| H  | 12.662271 | -3.553715 | 5.263150  |
| C  | 12.479242 | -2.251367 | 2.899421  |
| H  | 13.540090 | -2.014031 | 2.738009  |
| H  | 11.872811 | -1.872829 | 2.057070  |
| H  | 12.391147 | -3.347433 | 2.846002  |
| O  | 14.735970 | 0.304977  | 2.025771  |
| C  | 15.856690 | 0.321818  | 1.053101  |
| H  | 15.747156 | 1.232301  | 0.449817  |
| H  | 15.749740 | -0.559066 | 0.413036  |
| C  | 17.123429 | 0.328205  | 1.898223  |
| H  | 17.944053 | 0.842487  | 1.384526  |
| H  | 17.446478 | -0.699316 | 2.115590  |
| C  | 16.676547 | 1.032280  | 3.186176  |
| H  | 17.328702 | 0.816520  | 4.040815  |
| H  | 16.643963 | 2.122030  | 3.045619  |
| C  | 15.280511 | 0.475979  | 3.396601  |
| H  | 15.301894 | -0.517692 | 3.865730  |
| H  | 14.585760 | 1.125856  | 3.937099  |
| Cr | 10.942631 | -0.293454 | -1.546078 |
| Cl | 13.205788 | -0.329007 | -0.772223 |
| N  | 11.443481 | -0.707730 | -3.424478 |
| C  | 11.479421 | -1.970522 | -4.019578 |
| C  | 11.618846 | -1.811716 | -5.397117 |
| H  | 11.684318 | -2.609706 | -6.130832 |
| C  | 11.679028 | -0.418616 | -5.661269 |
| H  | 11.794467 | 0.048610  | -6.635019 |
| C  | 11.572571 | 0.240825  | -4.438087 |
| C  | 11.515849 | -3.283005 | -3.243246 |
| C  | 12.971031 | -3.604487 | -2.828629 |
| H  | 13.377498 | -2.821626 | -2.175502 |
| H  | 13.022915 | -4.562502 | -2.287835 |
| H  | 13.616464 | -3.677786 | -3.714598 |
| C  | 10.997678 | -4.432110 | -4.131028 |
| H  | 9.965631  | -4.250414 | -4.460655 |
| H  | 11.621091 | -4.565322 | -5.025201 |

|   |           |           |           |
|---|-----------|-----------|-----------|
| H | 11.017557 | -5.379970 | -3.573252 |
| C | 10.640181 | -3.240970 | -1.979774 |
| H | 10.985526 | -2.465167 | -1.260995 |
| H | 9.586740  | -3.042280 | -2.211216 |
| H | 10.701159 | -4.189195 | -1.425743 |
| C | 11.682854 | 1.747353  | -4.212452 |
| C | 13.174589 | 2.161150  | -4.258358 |
| H | 13.616794 | 1.900368  | -5.228942 |
| H | 13.287718 | 3.246168  | -4.106995 |
| H | 13.749952 | 1.646470  | -3.476043 |
| C | 10.926332 | 2.498962  | -5.328110 |
| H | 11.322938 | 2.245263  | -6.318969 |
| H | 9.855447  | 2.251140  | -5.320900 |
| H | 11.026619 | 3.586626  | -5.194617 |
| C | 11.100597 | 2.198967  | -2.865370 |
| H | 10.034194 | 1.959945  | -2.767833 |
| H | 11.670954 | 1.784542  | -2.008393 |
| H | 11.188694 | 3.290447  | -2.750172 |
| O | 8.916787  | -0.337996 | -2.050087 |
| C | 7.791947  | -0.315465 | -1.080499 |
| H | 7.888303  | -1.213132 | -0.456485 |
| H | 7.911090  | 0.578295  | -0.460830 |
| C | 6.526885  | -0.322419 | -1.927803 |
| H | 5.698457  | -0.814565 | -1.405020 |
| H | 6.217907  | 0.704477  | -2.167429 |
| C | 6.966037  | -1.058824 | -3.200241 |
| H | 6.318058  | -0.851511 | -4.060168 |
| H | 6.983538  | -2.145864 | -3.037680 |
| C | 8.369037  | -0.525202 | -3.419133 |
| H | 8.361729  | 0.460958  | -3.904681 |
| H | 9.057082  | -1.191006 | -3.948417 |

### **AROWUZ**<sup>18</sup>

Aqua-(2,2'-diamino-4,4'-bi-(1,3)thiazole-N,N')-(iminodiacetato-N,O,O')-chromium(III) chloride monohydrate

Charge = 1

Spin Multiplicity = 4

|    |          |          |           |
|----|----------|----------|-----------|
| Cr | 5.031705 | 2.318537 | 1.817073  |
| S  | 5.731160 | 6.614932 | 3.438617  |
| S  | 6.884974 | 3.687195 | -2.217571 |
| O  | 4.313108 | 1.780383 | 3.541168  |
| O  | 4.789609 | 0.864885 | 5.542010  |

|   |          |           |           |
|---|----------|-----------|-----------|
| O | 4.850077 | 0.519420  | 1.089003  |
| O | 5.821544 | -1.500262 | 0.875396  |
| O | 3.092342 | 2.783214  | 1.270032  |
| N | 5.394594 | 4.275649  | 2.389026  |
| N | 4.429503 | 4.500605  | 4.545044  |
| N | 5.832361 | 3.091798  | 0.070819  |
| N | 5.613923 | 1.379387  | -1.555970 |
| N | 6.806523 | 1.549676  | 2.593552  |
| C | 5.105880 | 4.978287  | 3.490888  |
| C | 6.370662 | 6.323617  | 1.848732  |
| H | 6.882532 | 7.115003  | 1.312059  |
| C | 6.091482 | 5.050941  | 1.450376  |
| C | 6.343604 | 4.395946  | 0.178628  |
| C | 6.951753 | 4.869501  | -0.944053 |
| H | 7.413147 | 5.835279  | -1.119756 |
| C | 6.025840 | 2.588326  | -1.156457 |
| C | 5.145440 | 1.289873  | 4.449866  |
| C | 6.621231 | 1.380911  | 4.068416  |
| H | 7.028382 | 2.267992  | 4.573939  |
| H | 7.171060 | 0.505598  | 4.437194  |
| C | 7.103935 | 0.269207  | 1.881407  |
| H | 7.587715 | -0.452869 | 2.551570  |
| H | 7.802626 | 0.481757  | 1.059949  |
| C | 5.850021 | -0.335651 | 1.254828  |
| H | 7.588482 | 2.191673  | 2.440444  |
| H | 4.144566 | 5.114780  | 5.299503  |
| H | 3.978056 | 3.588708  | 4.460469  |
| H | 5.082084 | 0.797230  | -0.906816 |
| H | 5.754067 | 1.062167  | -2.508092 |
| H | 2.452945 | 2.088163  | 1.524824  |
| H | 2.915565 | 2.974291  | 0.328814  |

### ATUREN<sup>19</sup>

Dichloro-(2,6-bis(2,6-diethylphenyliminomethyl)phenyl)-tetrahydrofuran-chromium(III)

Charge = 0

Spin Multiplicity = 4

|   |           |           |          |
|---|-----------|-----------|----------|
| C | 0.483602  | -0.051390 | 5.313801 |
| C | -0.810560 | 0.442433  | 5.109307 |
| C | -1.915053 | -0.246422 | 5.646511 |
| H | -2.932592 | 0.121730  | 5.496521 |
| C | -1.697849 | -1.417279 | 6.387756 |
| H | -2.550777 | -1.951306 | 6.807616 |
| C | -0.402726 | -1.913052 | 6.598326 |

|   |           |           |           |
|---|-----------|-----------|-----------|
| H | -0.257008 | -2.827979 | 7.177189  |
| C | 0.695703  | -1.222196 | 6.051260  |
| C | 2.091667  | -1.605716 | 6.104874  |
| H | 2.409684  | -2.541887 | 6.580645  |
| C | -0.823147 | 1.691926  | 4.375698  |
| H | -1.755255 | 2.241725  | 4.194613  |
| C | 0.337203  | 3.522103  | 3.444398  |
| C | 0.030827  | 4.613684  | 4.299265  |
| C | 0.162449  | 5.913763  | 3.783636  |
| H | -0.046612 | 6.759109  | 4.443305  |
| C | 0.556541  | 6.144949  | 2.468813  |
| H | 0.660615  | 7.165378  | 2.096050  |
| C | 0.808611  | 5.058515  | 1.631193  |
| H | 1.091634  | 5.225649  | 0.589373  |
| C | 0.705231  | 3.740662  | 2.093448  |
| C | -0.441782 | 4.475013  | 5.732909  |
| H | -0.221390 | 3.473458  | 6.119918  |
| H | 0.144533  | 5.170579  | 6.354138  |
| C | -1.936188 | 4.800246  | 5.911432  |
| H | -2.166336 | 5.822250  | 5.577056  |
| H | -2.222867 | 4.717949  | 6.970021  |
| H | -2.572561 | 4.113468  | 5.333719  |
| C | 0.893736  | 2.607162  | 1.115519  |
| H | 1.364021  | 1.746354  | 1.608628  |
| H | 1.575701  | 2.942435  | 0.318864  |
| C | -0.432579 | 2.150310  | 0.478717  |
| H | -1.132250 | 1.776661  | 1.240371  |
| H | -0.253860 | 1.337167  | -0.239968 |
| H | -0.924695 | 2.977023  | -0.054935 |
| C | 4.310235  | -1.339062 | 5.381004  |
| C | 4.537641  | -2.503666 | 4.596580  |
| C | 5.862059  | -2.945600 | 4.448834  |
| H | 6.056152  | -3.837123 | 3.850868  |
| C | 6.930893  | -2.278361 | 5.042294  |
| H | 7.950167  | -2.643947 | 4.905924  |
| C | 6.685509  | -1.147470 | 5.818853  |
| H | 7.513744  | -0.626875 | 6.305190  |
| C | 5.385177  | -0.662144 | 6.006897  |
| C | 3.425651  | -3.298863 | 3.932453  |
| H | 3.222905  | -4.196140 | 4.543306  |
| H | 2.501477  | -2.709073 | 3.925314  |
| C | 3.719184  | -3.734217 | 2.489311  |
| H | 3.903790  | -2.858498 | 1.851214  |
| H | 2.854065  | -4.275143 | 2.079350  |
| H | 4.588252  | -4.402794 | 2.418090  |
| C | 5.173518  | 0.499328  | 6.946796  |

|    |          |           |          |
|----|----------|-----------|----------|
| H  | 6.075521 | 1.130783  | 6.930220 |
| H  | 4.330700 | 1.119706  | 6.614753 |
| C  | 4.906264 | 0.045757  | 8.394269 |
| H  | 3.993330 | -0.563926 | 8.456614 |
| H  | 4.773598 | 0.916975  | 9.052117 |
| H  | 5.741742 | -0.554697 | 8.783934 |
| C  | 4.799512 | 1.475908  | 2.926816 |
| H  | 4.414898 | 0.589042  | 2.413041 |
| H  | 5.596865 | 1.183813  | 3.630169 |
| C  | 5.234207 | 2.617235  | 2.011285 |
| H  | 6.298216 | 2.541381  | 1.752808 |
| H  | 4.654956 | 2.595570  | 1.078966 |
| C  | 4.083234 | 3.398721  | 4.028156 |
| H  | 4.676890 | 3.370759  | 4.954420 |
| H  | 3.161933 | 3.960643  | 4.211277 |
| Cl | 2.140587 | 2.209980  | 6.491569 |
| Cl | 1.930140 | -0.386341 | 2.638873 |
| Cr | 2.013202 | 0.911779  | 4.568632 |
| N  | 2.971493 | -0.829776 | 5.527957 |
| N  | 0.317385 | 2.180193  | 3.966487 |
| O  | 3.688370 | 2.033063  | 3.690559 |
| C  | 4.908363 | 3.897414  | 2.827778 |
| H  | 4.335554 | 4.611544  | 2.223600 |
| H  | 5.818389 | 4.403528  | 3.174505 |

## AVIZIP<sup>20</sup>

*cis*-( $\eta^4$ -butadiene)-(*t*-butyl[(*t*-butylimino)phosphanyl]amido)-trimethylphosphine-chromium(III)

Charge = 0

Spin Multiplicity = 4

|    |           |           |           |
|----|-----------|-----------|-----------|
| Cr | 12.564074 | 12.546191 | 0.585830  |
| P  | 11.849362 | 12.547734 | 3.272281  |
| P  | 10.381608 | 12.549055 | -0.510245 |
| N  | 12.152193 | 13.768743 | 2.217594  |
| C  | 12.108261 | 15.196841 | 2.597135  |
| C  | 11.214406 | 15.948469 | 1.593522  |
| H  | 10.177873 | 15.585899 | 1.653568  |
| H  | 11.214899 | 17.027932 | 1.807396  |
| H  | 11.579261 | 15.793962 | 0.569292  |
| C  | 13.539698 | 15.769533 | 2.532895  |
| H  | 14.195240 | 15.241410 | 3.240319  |
| H  | 13.958058 | 15.656896 | 1.524133  |
| H  | 13.538839 | 16.839779 | 2.790065  |

|   |           |           |           |
|---|-----------|-----------|-----------|
| C | 11.552770 | 15.415201 | 4.017862  |
| H | 12.182868 | 14.928156 | 4.777515  |
| H | 11.523718 | 16.491212 | 4.243651  |
| H | 10.530502 | 15.018585 | 4.112791  |
| C | 8.902398  | 12.550947 | 0.593228  |
| C | 10.018815 | 13.972801 | -1.625496 |
| H | 9.018969  | 13.872087 | -2.072243 |
| H | 10.070438 | 14.909420 | -1.056556 |
| H | 10.771822 | 14.010501 | -2.423104 |
| C | 13.499350 | 13.937748 | -0.830072 |
| H | 13.269869 | 13.600537 | -1.845620 |
| H | 13.420102 | 15.018717 | -0.694563 |
| C | 14.506872 | 13.248393 | -0.078517 |
| H | 15.156932 | 13.775328 | 0.623903  |
| N | 12.148320 | 11.325456 | 2.217981  |
| C | 12.099938 | 9.897601  | 2.598006  |
| C | 11.204682 | 9.148163  | 1.594011  |
| H | 10.169211 | 9.513923  | 1.652934  |
| H | 11.201735 | 8.068829  | 1.808457  |
| H | 11.570916 | 9.300977  | 0.570019  |
| C | 13.529782 | 9.320795  | 2.535001  |
| H | 14.186253 | 9.847226  | 3.242835  |
| H | 13.949242 | 9.432043  | 1.526543  |
| H | 13.525714 | 8.250622  | 2.792436  |
| C | 11.542774 | 9.681379  | 4.018395  |
| H | 12.173724 | 10.166876 | 4.778334  |
| H | 11.510449 | 8.605533  | 4.244497  |
| H | 10.521597 | 10.081014 | 4.112439  |
| C | 10.015581 | 11.126323 | -1.625674 |
| H | 9.015781  | 11.228593 | -2.072150 |
| H | 10.066026 | 10.189473 | -1.056999 |
| H | 10.768270 | 11.087522 | -2.423544 |
| C | 13.495027 | 11.151361 | -0.829759 |
| H | 13.266679 | 11.488987 | -1.845435 |
| H | 13.412425 | 10.070677 | -0.693920 |
| C | 14.504674 | 11.837745 | -0.078319 |
| H | 15.153078 | 11.308956 | 0.624238  |
| H | 8.926993  | 11.662224 | 1.237062  |
| H | 7.971440  | 12.553602 | 0.008401  |
| H | 8.929476  | 13.440332 | 1.236330  |

## AVUDAW<sup>21</sup>

( $\eta^5$ -Cyclopentadienyl)-(N,N'-bis(2,6-di-isopropylphenyl)pentane-2,4-di-iminato-N,N')-methyl-chromium(III)



Charge = 0  
Spin Multiplicity = 4

|    |           |           |           |
|----|-----------|-----------|-----------|
| Cr | 8.398803  | 3.635301  | -1.727878 |
| N  | 7.599890  | 2.701837  | -0.078795 |
| N  | 7.518157  | 2.304549  | -3.022422 |
| C  | 7.437548  | 3.435978  | 1.155555  |
| C  | 6.208293  | 4.113203  | 1.390164  |
| C  | 6.068432  | 4.872861  | 2.559128  |
| C  | 7.104084  | 4.975969  | 3.487108  |
| C  | 8.293479  | 4.289999  | 3.259834  |
| C  | 8.483958  | 3.505527  | 2.111317  |
| C  | 5.027016  | 3.989169  | 0.431846  |
| C  | 4.240915  | 5.298827  | 0.250033  |
| C  | 4.065307  | 2.870121  | 0.883640  |
| C  | 9.788202  | 2.724878  | 1.979606  |
| C  | 11.020748 | 3.646628  | 1.929344  |
| C  | 9.954656  | 1.711395  | 3.131090  |
| C  | 6.997377  | 0.634455  | 1.168453  |
| C  | 7.297709  | 1.397035  | -0.107987 |
| C  | 7.242064  | 0.629405  | -1.288582 |
| C  | 7.247913  | 1.049719  | -2.631902 |
| C  | 6.936502  | -0.027769 | -3.652666 |
| C  | 7.268478  | 2.672775  | -4.397678 |
| C  | 6.007058  | 3.238838  | -4.735077 |
| C  | 5.778011  | 3.634635  | -6.059867 |
| C  | 6.754666  | 3.486032  | -7.043488 |
| C  | 7.979048  | 2.916794  | -6.706661 |
| C  | 8.259294  | 2.494786  | -5.397857 |
| C  | 4.887292  | 3.381942  | -3.707955 |
| C  | 3.972340  | 2.139395  | -3.695294 |
| C  | 4.027898  | 4.641916  | -3.910127 |
| C  | 9.609986  | 1.840454  | -5.126801 |
| C  | 10.776661 | 2.822238  | -5.346897 |
| C  | 9.821609  | 0.583290  | -5.994586 |
| C  | 10.144955 | 2.525018  | -1.616139 |
| C  | 9.763283  | 5.383717  | -2.232787 |
| C  | 9.185043  | 5.648357  | -0.957962 |
| C  | 7.782027  | 5.823935  | -1.142931 |
| C  | 7.489370  | 5.654930  | -2.515432 |
| C  | 8.715810  | 5.372176  | -3.193776 |
| H  | 5.129137  | 5.394704  | 2.748778  |
| H  | 6.978182  | 5.578936  | 4.388351  |
| H  | 9.095882  | 4.353085  | 3.997922  |
| H  | 5.435504  | 3.699573  | -0.548112 |
| H  | 3.711275  | 5.589166  | 1.169505  |

|   |           |           |           |
|---|-----------|-----------|-----------|
| H | 3.480268  | 5.170813  | -0.533814 |
| H | 4.889250  | 6.136573  | -0.043018 |
| H | 3.644019  | 3.099374  | 1.874740  |
| H | 4.570038  | 1.897593  | 0.947391  |
| H | 3.229529  | 2.772924  | 0.174264  |
| H | 9.747827  | 2.165588  | 1.035675  |
| H | 10.967824 | 4.352100  | 1.089676  |
| H | 11.937644 | 3.049682  | 1.810944  |
| H | 11.119717 | 4.230318  | 2.857163  |
| H | 9.090735  | 1.038087  | 3.213432  |
| H | 10.072088 | 2.225323  | 4.097225  |
| H | 10.852988 | 1.096918  | 2.968350  |
| H | 6.229195  | -0.128732 | 0.991646  |
| H | 6.673116  | 1.289208  | 1.983960  |
| H | 7.906231  | 0.109997  | 1.502916  |
| H | 7.023852  | -0.427332 | -1.137890 |
| H | 6.431378  | 0.368791  | -4.540379 |
| H | 6.318168  | -0.817052 | -3.208674 |
| H | 7.874901  | -0.493519 | -3.992530 |
| H | 4.814037  | 4.068472  | -6.329305 |
| H | 6.557398  | 3.805806  | -8.068427 |
| H | 8.739132  | 2.786891  | -7.479949 |
| H | 5.365631  | 3.448936  | -2.718816 |
| H | 3.173661  | 2.261056  | -2.947886 |
| H | 4.525583  | 1.223983  | -3.450718 |
| H | 3.497747  | 1.999163  | -4.678880 |
| H | 4.635915  | 5.553682  | -3.999149 |
| H | 3.345848  | 4.769583  | -3.057136 |
| H | 3.404116  | 4.569442  | -4.813543 |
| H | 9.624242  | 1.532409  | -4.073185 |
| H | 11.735491 | 2.335959  | -5.111501 |
| H | 10.682960 | 3.712389  | -4.710552 |
| H | 10.819431 | 3.157609  | -6.394394 |
| H | 8.999939  | -0.137149 | -5.879106 |
| H | 10.758710 | 0.080929  | -5.710967 |
| H | 9.892209  | 0.841527  | -7.062021 |
| H | 9.872007  | 1.472607  | -1.435137 |
| H | 10.783434 | 2.878904  | -0.792501 |
| H | 10.728350 | 2.589008  | -2.546529 |
| H | 10.815380 | 5.200584  | -2.429206 |
| H | 9.714459  | 5.712301  | -0.012303 |
| H | 7.065575  | 6.019511  | -0.351479 |
| H | 6.507536  | 5.713194  | -2.974080 |
| H | 8.822435  | 5.177327  | -4.256830 |

**AWAVAV<sup>22</sup>**

*trans*-Tricarbonyl-( $\eta^6$ -7-(1-methoxycarbonyl)cyclohexyl-1,3,5-cycloheptatriene)-chromium(0)

Charge = 0

Spin Multiplicity = 1

|    |           |           |           |
|----|-----------|-----------|-----------|
| Cr | -3.708548 | 10.741082 | 11.698674 |
| O  | -4.615452 | 14.557671 | 14.687408 |
| O  | -6.594560 | 13.463051 | 14.648492 |
| O  | -2.278933 | 8.383642  | 12.913692 |
| O  | -4.926417 | 8.931633  | 9.632366  |
| O  | -1.573552 | 10.986961 | 9.600557  |
| C  | -5.408349 | 13.487320 | 14.941984 |
| C  | -4.652404 | 12.330833 | 15.606222 |
| C  | -4.067524 | 11.349939 | 14.500222 |
| C  | -2.961864 | 11.883009 | 13.618109 |
| C  | -3.067216 | 12.723364 | 12.515656 |
| C  | -4.189734 | 12.917297 | 11.648418 |
| C  | -5.397343 | 12.198190 | 11.651900 |
| C  | -5.758067 | 11.121512 | 12.522601 |
| C  | -5.066731 | 10.630636 | 13.624058 |
| C  | -3.475394 | 12.818742 | 16.485616 |
| C  | -3.933567 | 13.583285 | 17.736561 |
| C  | -4.912436 | 12.754199 | 18.578034 |
| C  | -6.102526 | 12.285838 | 17.731024 |
| C  | -5.642972 | 11.522926 | 16.479917 |
| C  | -5.273467 | 15.675267 | 14.033331 |
| C  | -2.833411 | 9.297018  | 12.441925 |
| C  | -4.486698 | 9.641010  | 10.454001 |
| C  | -2.390311 | 10.917004 | 10.437360 |
| H  | -3.598548 | 10.564912 | 15.113540 |
| H  | -1.946629 | 11.746360 | 13.993984 |
| H  | -2.141326 | 13.189697 | 12.172790 |
| H  | -4.040943 | 13.607571 | 10.817517 |
| H  | -6.080473 | 12.396842 | 10.825587 |
| H  | -6.610917 | 10.529564 | 12.184396 |
| H  | -5.429435 | 9.673818  | 14.002787 |
| H  | -2.784855 | 13.433746 | 15.892902 |
| H  | -2.914446 | 11.922043 | 16.802640 |
| H  | -3.050979 | 13.858948 | 18.334718 |
| H  | -4.415408 | 14.529378 | 17.436892 |
| H  | -5.265057 | 13.340328 | 19.441110 |
| H  | -4.385846 | 11.873264 | 18.986006 |
| H  | -6.706607 | 13.157953 | 17.429102 |
| H  | -6.766036 | 11.638292 | 18.325312 |
| H  | -5.127977 | 10.597843 | 16.791356 |

|   |           |           |           |
|---|-----------|-----------|-----------|
| H | -6.511656 | 11.225648 | 15.876521 |
| H | -4.498680 | 16.439238 | 13.919326 |
| H | -6.097303 | 16.047756 | 14.654697 |
| H | -5.663053 | 15.367980 | 13.054749 |

### BABFOZ<sup>23</sup>

Dicarbonyl-(1-3a(7a)- $\eta^5$ -indenyl)-nitrosyl-chromium

Charge = 0

Spin Multiplicity = 1

|    |           |           |           |
|----|-----------|-----------|-----------|
| Cr | -1.679754 | 1.444322  | 2.902117  |
| O  | -1.625062 | -0.955108 | 4.465427  |
| O  | 1.323998  | 1.531618  | 2.604066  |
| O  | -2.100582 | -0.044111 | 0.307856  |
| N  | -1.634366 | 0.027554  | 3.806395  |
| C  | -3.660734 | 2.404678  | 2.974647  |
| C  | -3.033384 | 2.474893  | 4.255420  |
| C  | -1.837662 | 3.247619  | 4.154773  |
| C  | -0.859263 | 4.653113  | 2.165522  |
| C  | -1.099322 | 5.014357  | 0.857129  |
| C  | -2.215666 | 4.499069  | 0.135942  |
| C  | -3.102205 | 3.617247  | 0.716031  |
| C  | -2.904544 | 3.244313  | 2.075828  |
| C  | -1.770310 | 3.768465  | 2.809033  |
| C  | 0.165050  | 1.503922  | 2.699373  |
| C  | -1.927943 | 0.541185  | 1.298078  |
| H  | -4.587880 | 1.890200  | 2.740250  |
| H  | -3.383354 | 1.973749  | 5.154188  |
| H  | -1.152739 | 3.480617  | 4.964648  |
| H  | -0.007126 | 5.057622  | 2.713544  |
| H  | -0.424513 | 5.710991  | 0.357535  |
| H  | -2.367862 | 4.814020  | -0.897456 |
| H  | -3.958747 | 3.232790  | 0.160522  |

### BARKAG<sup>24</sup>

( $\mu_2$ -t-Butyldisulfonyl)-( $\mu_2$ -t-butylthiolato)-bis( $\eta^5$ -cyclopentadienyl)-dinitrosyl-di-chromium

Charge = 0

Spin Multiplicity = 1

|    |           |          |          |
|----|-----------|----------|----------|
| Cr | 1.011945  | 3.760673 | 8.807490 |
| Cr | -1.096994 | 5.342473 | 9.968604 |
| S  | 0.946506  | 6.028212 | 9.174866 |

|   |           |           |           |
|---|-----------|-----------|-----------|
| S | -0.952412 | 3.073327  | 9.753799  |
| S | -2.361850 | 2.299703  | 8.361434  |
| O | 0.295960  | 3.346377  | 6.080459  |
| O | -2.899492 | 5.946571  | 7.841187  |
| N | 0.528012  | 3.620857  | 7.223130  |
| N | -2.065757 | 5.663890  | 8.657630  |
| C | 0.983683  | 7.240898  | 7.703971  |
| C | 2.475754  | 7.501515  | 7.456916  |
| C | 0.290179  | 8.513784  | 8.201338  |
| C | 0.316629  | 6.706339  | 6.442552  |
| C | -2.875957 | 0.663683  | 9.132067  |
| C | -3.893429 | 0.125400  | 8.113265  |
| C | -3.538506 | 0.890327  | 10.493078 |
| C | -1.674775 | -0.277885 | 9.247588  |
| C | 2.255401  | 1.928316  | 8.780119  |
| C | 3.050687  | 3.037019  | 8.346548  |
| C | 3.165742  | 3.943929  | 9.433662  |
| C | 2.444224  | 3.407358  | 10.543836 |
| C | 1.893147  | 2.159699  | 10.135784 |
| C | -0.687052 | 5.225308  | 12.206289 |
| C | -2.045000 | 4.855050  | 11.940372 |
| C | -2.702260 | 5.967380  | 11.355082 |
| C | -1.752804 | 7.033509  | 11.247055 |
| C | -0.519323 | 6.572193  | 11.787162 |
| H | 2.586025  | 8.243168  | 6.649342  |
| H | 2.994402  | 6.583830  | 7.145438  |
| H | 2.971180  | 7.897273  | 8.354795  |
| H | 0.387463  | 9.301085  | 7.436538  |
| H | 0.745514  | 8.885246  | 9.130699  |
| H | -0.779067 | 8.339398  | 8.380305  |
| H | 0.326469  | 7.499655  | 5.676300  |
| H | -0.725790 | 6.419336  | 6.618254  |
| H | 0.855295  | 5.842229  | 6.038337  |
| H | -3.434650 | -0.025851 | 7.125603  |
| H | -4.752516 | 0.802705  | 8.003254  |
| H | -4.270488 | -0.847539 | 8.465961  |
| H | -4.405777 | 1.558965  | 10.406480 |
| H | -2.829615 | 1.326442  | 11.210744 |
| H | -3.881489 | -0.074184 | 10.901670 |
| H | -1.202866 | -0.441739 | 8.269352  |
| H | -2.005835 | -1.251982 | 9.643077  |
| H | -0.919896 | 0.125632  | 9.936668  |
| H | 1.967916  | 1.073573  | 8.174972  |
| H | 3.473984  | 3.168578  | 7.354816  |
| H | 3.696681  | 4.890008  | 9.420145  |
| H | 2.343677  | 3.865428  | 11.522842 |

|   |           |          |           |
|---|-----------|----------|-----------|
| H | 1.283991  | 1.504649 | 10.750900 |
| H | 0.070842  | 4.592864 | 12.658224 |
| H | -2.492687 | 3.888058 | 12.145858 |
| H | -3.735083 | 5.996259 | 11.019599 |
| H | -1.942570 | 8.017200 | 10.828285 |
| H | 0.404047  | 7.140418 | 11.833679 |

### BARKEK<sup>24</sup>

( $\eta^5$ -Cyclopentadienyl)-nitrito-dinitrosyl-chromium

Charge = 0

Spin Multiplicity = 1

|    |           |           |           |
|----|-----------|-----------|-----------|
| Cr | -0.001162 | 0.046167  | 0.005492  |
| O  | 2.736313  | -0.755604 | 0.319855  |
| O  | -0.483321 | 0.096709  | 2.834317  |
| O  | -0.917720 | -1.608037 | -0.604840 |
| O  | -0.007566 | -2.872358 | 0.924371  |
| N  | 1.593787  | -0.534809 | 0.175747  |
| N  | -0.331143 | -0.021933 | 1.677643  |
| N  | -0.760284 | -2.800869 | -0.032787 |
| C  | -1.148338 | 0.873445  | -1.766455 |
| C  | 0.242535  | 1.083774  | -1.961308 |
| C  | 0.712455  | 1.926111  | -0.895056 |
| C  | -0.388751 | 2.213892  | -0.047831 |
| C  | -1.546542 | 1.551597  | -0.583577 |
| H  | -1.781789 | 0.232603  | -2.372262 |
| H  | 0.847160  | 0.677458  | -2.767185 |
| H  | 1.733880  | 2.268142  | -0.754915 |
| H  | -0.359197 | 2.814211  | 0.857016  |
| H  | -2.544688 | 1.563472  | -0.155116 |

### BEFJEC<sup>25</sup>

(3,3'-(Pyridine-2,6-diyl)bis(1-isopropylimidazol-2-ylidene))-trichloro-chromium(III)  
dichloromethane solvate

Charge = 0

Spin Multiplicity = 4

|    |          |           |          |
|----|----------|-----------|----------|
| Cr | 2.984214 | 0.929079  | 2.244748 |
| Cl | 3.109988 | -1.042224 | 0.959170 |
| Cl | 2.744441 | 2.988161  | 3.367078 |
| Cl | 4.091514 | -0.053716 | 4.034258 |
| N  | 0.112291 | 0.997285  | 1.640628 |

|   |           |           |           |
|---|-----------|-----------|-----------|
| N | 2.006950  | 1.774729  | 0.648747  |
| C | -1.205295 | 0.029378  | 3.100476  |
| H | -2.026944 | -0.380331 | 3.675206  |
| N | 0.127800  | -0.074449 | 3.508613  |
| C | 0.958423  | 0.513294  | 2.625610  |
| N | 4.081117  | 2.400986  | -0.046880 |
| C | 2.090657  | 2.977526  | -1.421999 |
| H | 2.669503  | 3.483184  | -2.191849 |
| C | -0.037432 | 2.225518  | -0.517014 |
| H | -1.120362 | 2.143879  | -0.580199 |
| C | 0.669474  | 1.683797  | 0.554092  |
| C | 0.576650  | -0.734526 | 4.761291  |
| H | 1.671195  | -0.639554 | 4.732266  |
| C | 0.699956  | 2.877257  | -1.508530 |
| H | 0.182587  | 3.313317  | -2.362808 |
| C | -1.220155 | 0.704910  | 1.921411  |
| H | -2.044806 | 0.992228  | 1.281221  |
| C | 2.705613  | 2.403358  | -0.311772 |
| C | 0.034016  | 0.015759  | 5.979429  |
| H | 0.329669  | 1.073288  | 5.953843  |
| H | 0.443823  | -0.435282 | 6.893374  |
| H | -1.063199 | -0.043269 | 6.036238  |
| C | 0.193922  | -2.215286 | 4.751163  |
| H | -0.897383 | -2.353649 | 4.771687  |
| H | 0.610941  | -2.700490 | 5.644126  |
| H | 0.597207  | -2.721491 | 3.863710  |
| N | 5.869108  | 1.970247  | 1.073503  |
| C | 5.127817  | 2.967379  | -0.770299 |
| H | 4.992264  | 3.502591  | -1.701777 |
| C | 4.535928  | 1.777053  | 1.104034  |
| C | 6.253168  | 2.693393  | -0.059506 |
| H | 7.284351  | 2.951914  | -0.267221 |
| C | 6.804399  | 1.496914  | 2.126185  |
| H | 6.157860  | 0.954222  | 2.829991  |
| C | 7.833850  | 0.534146  | 1.532304  |
| H | 7.341836  | -0.307697 | 1.026727  |
| H | 8.459495  | 0.133065  | 2.341268  |
| H | 8.496782  | 1.039070  | 0.813930  |
| C | 7.442595  | 2.690353  | 2.840266  |
| H | 6.674196  | 3.356893  | 3.254643  |
| H | 8.086726  | 3.271190  | 2.163260  |
| H | 8.065890  | 2.325101  | 3.667840  |

**BEKGOP<sup>26</sup>**

Chloro-methyl-( $\eta^5$ -1-(2,6-diisopropylphenyl)-2-(2-(4,7-dimethylindenyl)ethyl)imidazol-2-ylidene)-chromium(III) tetrahydrofuran solvate

Charge = 0

Spin Multiplicity = 4

|    |           |           |           |
|----|-----------|-----------|-----------|
| Cr | 18.705478 | 1.726347  | 15.542114 |
| Cl | 17.665738 | 3.786931  | 15.389333 |
| C  | 17.293558 | 0.444893  | 16.323651 |
| N  | 16.056387 | 0.620283  | 16.899570 |
| N  | 17.495234 | -0.910279 | 16.398373 |
| C  | 15.519721 | -0.593682 | 17.315832 |
| H  | 14.552023 | -0.659067 | 17.797253 |
| C  | 18.682743 | -1.613595 | 15.896773 |
| H  | 18.722404 | -1.480659 | 14.808198 |
| H  | 18.529758 | -2.679975 | 16.103954 |
| C  | 19.987961 | -1.128974 | 16.549094 |
| H  | 19.917182 | -1.289003 | 17.635470 |
| H  | 20.791439 | -1.786715 | 16.188398 |
| C  | 16.427530 | -1.556061 | 16.999449 |
| H  | 16.402844 | -2.629811 | 17.142871 |
| C  | 20.313519 | 0.318270  | 16.287700 |
| C  | 20.906363 | 0.935400  | 15.115389 |
| C  | 21.413334 | 0.417096  | 13.879703 |
| C  | 20.972151 | 2.364713  | 15.373991 |
| C  | 21.909270 | 2.739917  | 13.206902 |
| H  | 22.300974 | 3.402991  | 12.431994 |
| C  | 20.481673 | 2.597683  | 16.708293 |
| H  | 20.394478 | 3.564344  | 17.194526 |
| C  | 21.454655 | 3.282801  | 14.396075 |
| C  | 21.900403 | 1.340753  | 12.968487 |
| H  | 22.304711 | 0.973691  | 12.021820 |
| C  | 20.142727 | 1.351382  | 17.268580 |
| H  | 19.748780 | 1.187944  | 18.269270 |
| C  | 15.344346 | 1.862695  | 17.122554 |
| C  | 15.544886 | 2.543809  | 18.339751 |
| C  | 16.531524 | 2.069887  | 19.398727 |
| H  | 17.097639 | 1.225268  | 18.980680 |
| C  | 13.669766 | 3.444129  | 16.440944 |
| H  | 12.940314 | 3.803920  | 15.713625 |
| C  | 14.179983 | 1.542684  | 14.849534 |
| H  | 14.974289 | 0.789784  | 14.746379 |
| C  | 14.412732 | 2.290533  | 16.155511 |
| C  | 17.547038 | 3.168369  | 19.761347 |
| H  | 18.063407 | 3.538259  | 18.864710 |
| H  | 18.299134 | 2.774536  | 20.461058 |



|   |           |           |           |
|---|-----------|-----------|-----------|
| H | 17.057081 | 4.024456  | 20.248491 |
| C | 14.777926 | 3.694250  | 18.571408 |
| H | 14.909378 | 4.246642  | 19.503358 |
| C | 14.274381 | 2.475463  | 13.629251 |
| H | 13.457744 | 3.212769  | 13.619224 |
| H | 14.202351 | 1.889321  | 12.701118 |
| H | 15.229392 | 3.018909  | 13.626820 |
| C | 12.829072 | 0.800162  | 14.869706 |
| H | 12.767509 | 0.092087  | 15.708795 |
| H | 12.689599 | 0.235472  | 13.935706 |
| H | 11.992692 | 1.509292  | 14.964788 |
| C | 18.190153 | 1.185930  | 13.609943 |
| H | 18.347935 | 0.121916  | 13.370972 |
| H | 18.836762 | 1.788103  | 12.948382 |
| H | 17.139694 | 1.445336  | 13.414827 |
| C | 13.848014 | 4.141166  | 17.634721 |
| H | 13.259162 | 5.037896  | 17.835965 |
| C | 15.798849 | 1.559869  | 20.655121 |
| H | 15.221655 | 2.367204  | 21.130617 |
| H | 16.522678 | 1.182422  | 21.392814 |
| H | 15.101894 | 0.744769  | 20.412339 |
| C | 21.469807 | -1.055528 | 13.566989 |
| H | 21.933484 | -1.217520 | 12.584842 |
| H | 20.469567 | -1.514817 | 13.538420 |
| H | 22.060700 | -1.611619 | 14.310757 |
| C | 21.471255 | 4.759324  | 14.674751 |
| H | 21.868349 | 5.318169  | 13.817157 |
| H | 22.090192 | 4.996007  | 15.555174 |
| H | 20.454308 | 5.124938  | 14.889660 |

### BEQLIU00<sup>27</sup>

(N,N'-Bis(2,6-diisopropylphenyl)pentane-2,4-diiminato)-(η<sup>2</sup>-1,2-diphenylacetylene)-chromium

Charge = 0

Spin Multiplicity = 4

|    |           |          |           |
|----|-----------|----------|-----------|
| Cr | 9.450172  | 4.676400 | 14.147827 |
| N  | 10.829668 | 3.253832 | 14.297409 |
| C  | 5.476028  | 4.674349 | 12.130391 |
| H  | 5.011650  | 4.672939 | 13.117565 |
| C  | 4.679085  | 4.674012 | 10.985433 |
| H  | 3.591480  | 4.672318 | 11.081240 |
| C  | 5.269973  | 4.675891 | 9.715431  |
| H  | 4.645632  | 4.675692 | 8.820192  |
| C  | 6.664354  | 4.677998 | 9.601503  |

|   |           |           |           |
|---|-----------|-----------|-----------|
| H | 7.131297  | 4.679613  | 8.614782  |
| C | 7.459802  | 4.678187  | 10.748136 |
| H | 8.547663  | 4.679713  | 10.662245 |
| C | 6.885640  | 4.676469  | 12.034618 |
| C | 7.729043  | 4.676737  | 13.227634 |
| C | 7.528185  | 4.676849  | 14.548045 |
| C | 6.423115  | 4.677950  | 15.492372 |
| C | 5.877715  | 3.467960  | 15.974849 |
| H | 6.295760  | 2.521338  | 15.628513 |
| C | 4.813709  | 3.472818  | 16.878437 |
| H | 4.405873  | 2.523554  | 17.232119 |
| C | 4.271265  | 4.680382  | 17.332731 |
| H | 3.440556  | 4.681309  | 18.040165 |
| C | 10.284592 | 1.935751  | 14.516814 |
| C | 9.858439  | 1.153929  | 13.410875 |
| C | 9.342730  | -0.125028 | 13.662044 |
| H | 9.019574  | -0.744600 | 12.824246 |
| C | 9.227849  | -0.622904 | 14.959093 |
| H | 8.821699  | -1.621743 | 15.129278 |
| C | 9.626541  | 0.165436  | 16.036132 |
| H | 9.521997  | -0.221905 | 17.051625 |
| C | 10.160512 | 1.446770  | 15.843284 |
| C | 10.558113 | 2.270706  | 17.063789 |
| H | 11.033376 | 3.194943  | 16.705440 |
| C | 9.315813  | 2.674789  | 17.879784 |
| H | 8.600910  | 3.241778  | 17.267249 |
| H | 9.606793  | 3.300380  | 18.736854 |
| H | 8.796742  | 1.786813  | 18.271645 |
| C | 11.573147 | 1.538818  | 17.961964 |
| H | 11.889526 | 2.193895  | 18.787403 |
| H | 12.471622 | 1.238033  | 17.404250 |
| H | 11.136315 | 0.632305  | 18.407058 |
| C | 9.960857  | 1.652291  | 11.972369 |
| H | 10.043603 | 2.749994  | 12.013575 |
| C | 11.221092 | 1.113692  | 11.265389 |
| H | 12.144370 | 1.417694  | 11.776215 |
| H | 11.268765 | 1.491119  | 10.232535 |
| H | 11.203603 | 0.013575  | 11.222803 |
| C | 8.711145  | 1.312073  | 11.143396 |
| H | 7.794287  | 1.662525  | 11.635978 |
| H | 8.618907  | 0.229389  | 10.970309 |
| H | 8.772380  | 1.796066  | 10.158003 |
| C | 13.086448 | 2.220049  | 14.378868 |
| H | 12.665558 | 1.323287  | 13.910097 |
| H | 13.262562 | 1.976051  | 15.438114 |
| H | 14.060105 | 2.444358  | 13.926592 |

|   |           |           |           |
|---|-----------|-----------|-----------|
| C | 12.165887 | 3.414563  | 14.266829 |
| C | 12.778433 | 4.676202  | 14.187777 |
| H | 13.866382 | 4.676139  | 14.139412 |
| N | 10.829750 | 6.098699  | 14.298041 |
| C | 10.284942 | 7.416975  | 14.517182 |
| C | 9.860842  | 8.199607  | 13.411022 |
| C | 9.345634  | 9.478788  | 13.662050 |
| H | 9.024117  | 10.098948 | 12.824046 |
| C | 9.229218  | 9.976150  | 14.959144 |
| H | 8.823699  | 10.975268 | 15.129193 |
| C | 9.625617  | 9.186944  | 16.036394 |
| H | 9.519746  | 9.573804  | 17.051937 |
| C | 10.158935 | 7.905315  | 15.843718 |
| C | 10.553913 | 7.080474  | 17.064470 |
| H | 11.027291 | 6.155186  | 16.706308 |
| C | 9.310204  | 6.679232  | 17.879736 |
| H | 8.594261  | 6.114092  | 17.266699 |
| H | 9.599221  | 6.052772  | 18.736834 |
| H | 8.793059  | 7.568361  | 18.271551 |
| C | 11.569996 | 7.810137  | 17.963262 |
| H | 11.883818 | 7.154726  | 18.789417 |
| H | 12.469869 | 8.108206  | 17.406339 |
| H | 11.135046 | 8.718071  | 18.407324 |
| C | 9.964463  | 7.701987  | 11.972352 |
| H | 10.050443 | 6.604528  | 12.013134 |
| C | 11.222687 | 8.244655  | 11.264928 |
| H | 12.147162 | 7.943432  | 11.775231 |
| H | 11.271036 | 7.867568  | 10.231975 |
| H | 11.201778 | 9.344716  | 11.222543 |
| C | 8.713256  | 8.038843  | 11.144174 |
| H | 7.797796  | 7.684930  | 11.636876 |
| H | 8.617420  | 9.121395  | 10.972234 |
| H | 8.775623  | 7.555988  | 10.158283 |
| C | 13.086617 | 7.132247  | 14.380045 |
| H | 12.666596 | 8.028708  | 13.909917 |
| H | 13.260953 | 7.377157  | 15.439377 |
| H | 14.060945 | 6.907450  | 13.929487 |
| C | 12.166005 | 5.937849  | 14.267388 |
| C | 5.872880  | 5.889283  | 15.966033 |
| H | 6.287107  | 6.835001  | 15.612689 |
| C | 4.809054  | 5.886771  | 16.869828 |
| H | 4.397512  | 6.836948  | 17.216703 |

## **BEXPID<sup>28</sup>**

Tricarbonyl-( $\eta^6$ -fulvene)-chromium

Charge = 0  
Spin Multiplicity = 1

|    |          |          |           |
|----|----------|----------|-----------|
| Cr | 3.913676 | 3.166893 | 22.757626 |
| C  | 6.014345 | 2.970868 | 23.271815 |
| C  | 5.320851 | 2.253957 | 24.264843 |
| C  | 4.572501 | 1.195129 | 23.634318 |
| C  | 4.795934 | 1.249321 | 22.245831 |
| C  | 5.659358 | 2.396490 | 21.975685 |
| C  | 5.378857 | 3.244347 | 20.888527 |
| C  | 2.570822 | 3.368548 | 24.013462 |
| O  | 1.709917 | 3.512788 | 24.788582 |
| C  | 2.553701 | 2.959117 | 21.533854 |
| O  | 1.694870 | 2.800033 | 20.758156 |
| C  | 3.996243 | 5.007159 | 22.757670 |
| O  | 4.067942 | 6.172906 | 22.776931 |
| H  | 6.646282 | 3.841518 | 23.419878 |
| H  | 5.336034 | 2.460330 | 25.331274 |
| H  | 3.937676 | 0.482313 | 24.152943 |
| H  | 4.354964 | 0.604717 | 21.491205 |
| H  | 4.922882 | 2.841744 | 19.984808 |
| H  | 5.887123 | 4.203633 | 20.798722 |

### **BILDIJ**<sup>29</sup>

Tris(2-((Dimethylamino)-methyl)-phenyl-C<sup>1</sup>,N)-chromium(III)

Charge = 0  
Spin Multiplicity = 4

|    |           |           |           |
|----|-----------|-----------|-----------|
| Cr | 0.001756  | -0.000104 | -0.048598 |
| N  | 1.458003  | -1.504125 | 1.185162  |
| C  | -0.147791 | -1.747919 | -1.132228 |
| C  | -0.623764 | -1.919536 | -2.447913 |
| C  | -0.664214 | -3.170783 | -3.077275 |
| C  | -0.213522 | -4.310431 | -2.402215 |
| C  | 0.271640  | -4.178784 | -1.097228 |
| C  | 0.294285  | -2.922317 | -0.474734 |
| C  | 0.755663  | -2.798605 | 0.955271  |
| C  | 1.661931  | -1.334626 | 2.640594  |
| C  | 2.796065  | -1.588990 | 0.548576  |
| H  | -0.989070 | -1.050143 | -3.001037 |
| H  | -1.045625 | -3.257059 | -4.098435 |
| H  | -0.231997 | -5.288497 | -2.887575 |
| H  | 0.635905  | -5.060289 | -0.560248 |

|   |           |           |           |
|---|-----------|-----------|-----------|
| H | 1.412637  | -3.641399 | 1.247667  |
| H | -0.109410 | -2.822870 | 1.638273  |
| H | 2.257256  | -0.433254 | 2.831960  |
| H | 0.697336  | -1.244543 | 3.153162  |
| H | 2.206400  | -2.198618 | 3.066209  |
| H | 3.334277  | -0.643933 | 0.680979  |
| H | 3.382822  | -2.408162 | 1.006016  |
| H | 2.681480  | -1.776130 | -0.523617 |
| N | 0.573894  | 2.014335  | 1.190860  |
| N | -2.029274 | -0.510447 | 1.189068  |
| C | 1.589553  | 0.748417  | -1.129034 |
| C | -1.438509 | 1.001283  | -1.130550 |
| C | 2.045534  | 2.057672  | 0.958533  |
| C | 0.327505  | 2.106647  | 2.646620  |
| C | -0.026468 | 3.213203  | 0.554472  |
| C | -2.801388 | 0.743019  | 0.955725  |
| C | -1.986315 | -0.768364 | 2.645099  |
| C | -2.768841 | -1.629730 | 0.554376  |
| C | 1.976095  | 0.423384  | -2.445101 |
| C | 2.382792  | 1.720870  | -0.471837 |
| C | -1.348756 | 1.498080  | -2.446678 |
| C | -2.678164 | 1.201846  | -0.475093 |
| H | 2.444364  | 3.049391  | 1.249855  |
| H | 2.502295  | 1.322410  | 1.641342  |
| H | -0.750793 | 2.165308  | 2.840105  |
| H | 0.738311  | 1.229536  | 3.159665  |
| H | 0.798964  | 3.013648  | 3.069969  |
| H | -1.113922 | 3.202786  | 0.687710  |
| H | 0.386648  | 4.132592  | 1.011325  |
| H | 0.192067  | 3.207951  | -0.517890 |
| H | -3.859579 | 0.593954  | 1.248025  |
| H | -2.391601 | 1.506589  | 1.637330  |
| H | -1.499714 | -1.732151 | 2.839522  |
| H | -1.430623 | 0.025658  | 3.157007  |
| H | -3.007557 | -0.811177 | 3.068596  |
| H | -2.219456 | -2.567408 | 0.693226  |
| H | -3.773201 | -1.726949 | 1.008748  |
| H | -2.869650 | -1.441710 | -0.519024 |
| C | 3.077396  | 1.017644  | -3.075299 |
| H | 1.407617  | -0.329292 | -2.997874 |
| C | 3.479508  | 2.333386  | -1.095437 |
| C | -2.413682 | 2.153326  | -3.078810 |
| H | -0.411769 | 1.382769  | -2.997963 |
| C | -3.756721 | 1.843897  | -1.100598 |
| C | 3.836091  | 1.980521  | -2.400819 |
| H | 3.342996  | 0.731392  | -4.096681 |

|   |           |          |           |
|---|-----------|----------|-----------|
| H | 4.058602  | 3.091708 | -0.559077 |
| C | -3.628073 | 2.328164 | -2.406241 |
| H | -2.297450 | 2.525823 | -4.100305 |
| H | -4.703756 | 1.966016 | -0.565526 |
| H | 4.690231  | 2.456594 | -2.886961 |
| H | -4.467260 | 2.828528 | -2.894017 |

**BIPMAO<sup>30</sup>**

N-(1,3-Diphenylpropylidene)-aniline-dicarbonyl-chromium(0)

Charge = 0

Spin Multiplicity = 1

|    |          |           |           |
|----|----------|-----------|-----------|
| Cr | 6.358665 | -0.392089 | 1.048372  |
| O  | 7.687638 | 1.925157  | -0.320378 |
| O  | 5.853058 | -1.483572 | -1.696343 |
| N  | 4.539237 | 0.651647  | 1.265939  |
| C  | 6.189414 | -0.766742 | 3.240901  |
| C  | 5.815730 | -1.957512 | 2.543224  |
| C  | 6.690920 | -2.521022 | 1.586813  |
| C  | 7.942642 | -1.917468 | 1.304043  |
| C  | 8.296203 | -0.722574 | 1.976126  |
| C  | 7.448145 | -0.182641 | 2.989290  |
| C  | 5.216777 | -0.069649 | 4.154009  |
| C  | 4.840270 | 1.322082  | 3.602647  |
| C  | 4.066380 | 1.293286  | 2.306002  |
| C  | 2.777666 | 2.047715  | 2.312204  |
| C  | 2.531857 | 3.106557  | 1.420280  |
| C  | 1.345990 | 3.839772  | 1.497678  |
| C  | 0.379535 | 3.521773  | 2.456646  |
| C  | 0.615730 | 2.474880  | 3.353675  |
| C  | 1.810776 | 1.756368  | 3.293296  |
| C  | 3.686873 | 0.567535  | 0.100733  |
| C  | 3.948270 | 1.342554  | -1.035816 |
| C  | 3.129545 | 1.228137  | -2.160430 |
| C  | 2.051479 | 0.336071  | -2.166109 |
| C  | 1.797280 | -0.441154 | -1.032163 |
| C  | 2.607658 | -0.325175 | 0.100050  |
| C  | 7.135180 | 1.034640  | 0.223366  |
| C  | 5.977808 | -1.021111 | -0.617693 |
| H  | 4.833397 | -2.397342 | 2.710178  |
| H  | 6.379124 | -3.403032 | 1.028140  |
| H  | 8.591984 | -2.332621 | 0.535506  |
| H  | 9.233261 | -0.223085 | 1.734506  |
| H  | 7.742349 | 0.728844  | 3.509183  |

|   |           |           |           |
|---|-----------|-----------|-----------|
| H | 5.664327  | 0.060995  | 5.151466  |
| H | 4.313418  | -0.682111 | 4.282886  |
| H | 5.765271  | 1.900068  | 3.431028  |
| H | 4.261087  | 1.874686  | 4.352340  |
| H | 3.280206  | 3.370406  | 0.674144  |
| H | 1.179286  | 4.666909  | 0.805667  |
| H | -0.549610 | 4.091245  | 2.510171  |
| H | -0.130082 | 2.220024  | 4.108432  |
| H | 1.985903  | 0.947452  | 4.005061  |
| H | 4.794354  | 2.029931  | -1.036019 |
| H | 3.338208  | 1.841288  | -3.038893 |
| H | 1.417841  | 0.244820  | -3.049518 |
| H | 0.962002  | -1.143800 | -1.024680 |
| H | 2.413087  | -0.933647 | 0.984225  |

### BOLMEU<sup>31</sup>

( $\eta^4, \eta^2$ -6,6-bis(Methylthio)fulvene)-tricarbonyl-chromium

Charge = 0

Spin Multiplicity = 1

|    |          |           |           |
|----|----------|-----------|-----------|
| Cr | 4.721398 | 0.440446  | 10.697406 |
| S  | 5.041603 | -2.352370 | 13.768036 |
| S  | 2.264173 | -1.664356 | 12.660448 |
| O  | 2.311632 | -0.335956 | 9.073804  |
| O  | 5.535572 | 2.098726  | 8.336962  |
| O  | 6.509567 | -1.716423 | 9.604948  |
| C  | 3.551324 | 1.206941  | 12.375180 |
| C  | 4.405864 | 2.251289  | 11.964666 |
| C  | 5.766995 | 1.815663  | 12.113990 |
| C  | 5.764661 | 0.497866  | 12.617255 |
| C  | 4.378829 | 0.092096  | 12.814853 |
| C  | 3.931594 | -1.236212 | 13.018617 |
| C  | 4.585840 | -3.990377 | 13.109232 |
| C  | 1.653506 | -2.410870 | 14.218025 |
| C  | 3.249877 | -0.045448 | 9.713796  |
| C  | 5.219591 | 1.454227  | 9.265636  |
| C  | 5.802507 | -0.883652 | 10.030353 |
| H  | 2.466878 | 1.226014  | 12.394678 |
| H  | 4.088094 | 3.220375  | 11.591449 |
| H  | 6.649973 | 2.398792  | 11.869419 |
| H  | 6.637207 | -0.112455 | 12.825313 |
| H  | 3.708936 | -4.407850 | 13.613689 |
| H  | 4.421169 | -3.921214 | 12.028787 |
| H  | 5.459090 | -4.621909 | 13.314923 |

|   |          |           |           |
|---|----------|-----------|-----------|
| H | 2.108413 | -3.386146 | 14.418795 |
| H | 1.813188 | -1.722133 | 15.054286 |
| H | 0.577620 | -2.543525 | 14.046834 |

**BOLMIY<sup>31</sup>**

( $\eta^4, \eta^2$ -6,6-Dicyclopropylfulvene)-tricarbonyl-chromium

Charge = 0

Spin Multiplicity = 1

|    |           |           |          |
|----|-----------|-----------|----------|
| Cr | 1.451341  | 7.495526  | 4.950353 |
| C  | 0.901429  | 7.373444  | 3.205651 |
| O  | 0.543905  | 7.282149  | 2.092535 |
| C  | 0.947870  | 9.248009  | 5.143408 |
| O  | 0.628138  | 10.367680 | 5.282627 |
| C  | -0.250015 | 7.031350  | 5.423110 |
| O  | -1.348319 | 6.740981  | 5.719469 |
| C  | 3.080598  | 7.685927  | 6.378271 |
| C  | 2.300367  | 6.599006  | 6.815818 |
| C  | 2.298752  | 5.594181  | 5.789113 |
| C  | 3.076200  | 6.054708  | 4.709604 |
| C  | 3.599979  | 7.378658  | 5.043580 |
| C  | 4.033922  | 8.333544  | 4.093781 |
| C  | 4.468479  | 9.701646  | 4.483043 |
| C  | 5.034152  | 10.102434 | 5.825877 |
| C  | 5.959656  | 10.030184 | 4.642734 |
| C  | 4.178626  | 7.942976  | 2.681276 |
| C  | 4.135448  | 8.961478  | 1.541300 |
| C  | 5.430910  | 8.290190  | 1.853673 |
| H  | 3.241712  | 8.602570  | 6.930952 |
| H  | 1.776830  | 6.535061  | 7.765368 |
| H  | 1.779581  | 4.641456  | 5.836204 |
| H  | 3.264812  | 5.503739  | 3.794496 |
| H  | 3.920321  | 10.491518 | 3.965583 |
| H  | 5.172686  | 9.338054  | 6.587520 |
| H  | 4.748698  | 11.082160 | 6.208376 |
| H  | 6.662477  | 9.197646  | 4.622939 |
| H  | 6.317062  | 10.949557 | 4.180108 |
| H  | 3.743765  | 6.980078  | 2.424601 |
| H  | 3.581466  | 8.655314  | 0.655116 |
| H  | 4.028670  | 10.010957 | 1.811460 |
| H  | 5.787441  | 7.498076  | 1.195704 |
| H  | 6.205021  | 8.877014  | 2.341841 |

**BOLMOE<sup>31</sup>**



( $\eta^4, \eta^2$ -6,6-Ethylenedithiofulvene)-tricarbonyl-chromium

Charge = 0

Spin Multiplicity = 1

|    |          |          |           |
|----|----------|----------|-----------|
| Cr | 7.313322 | 6.859645 | 0.972137  |
| S  | 3.411456 | 6.831954 | -0.633373 |
| S  | 5.308763 | 8.462220 | -2.189515 |
| O  | 9.019979 | 6.780825 | -1.497573 |
| O  | 6.527925 | 3.969872 | 0.721835  |
| O  | 9.700120 | 5.996906 | 2.562796  |
| C  | 6.732258 | 8.945759 | 0.656252  |
| C  | 7.217829 | 8.845277 | 1.978334  |
| C  | 6.388390 | 7.922152 | 2.701285  |
| C  | 5.386730 | 7.440691 | 1.830499  |
| C  | 5.554328 | 8.099938 | 0.543901  |
| C  | 4.861138 | 7.790147 | -0.645910 |
| C  | 3.285190 | 6.678081 | -2.457056 |
| C  | 3.759678 | 7.988528 | -3.055287 |
| C  | 8.355073 | 6.805923 | -0.529374 |
| C  | 6.838378 | 5.098904 | 0.816534  |
| C  | 8.761363 | 6.335830 | 1.939704  |
| H  | 7.135639 | 9.577451 | -0.129636 |
| H  | 8.079331 | 9.371648 | 2.378361  |
| H  | 6.518089 | 7.631459 | 3.739546  |
| H  | 4.606368 | 6.728843 | 2.082296  |
| H  | 2.230776 | 6.480838 | -2.690154 |
| H  | 3.899964 | 5.825571 | -2.772748 |
| H  | 4.007546 | 7.884113 | -4.119329 |
| H  | 3.030158 | 8.796913 | -2.920254 |

**BOZYIY<sup>32</sup>**

Nitrido-(5,10,15,20-tetra-*p*-tolylporphinato)-chromium(V) benzene solvate

Charge = 0

Spin Multiplicity = 2

|    |                  |                  |                  |
|----|------------------|------------------|------------------|
| Cr | 4.44583277928436 | 1.83050637458661 | 1.81920965894958 |
| N  | 4.48238615059093 | 0.29216069920470 | 1.85423528204368 |
| N  | 2.43060393329304 | 2.23784415119873 | 1.91783183099024 |
| C  | 1.53829154532119 | 2.23185592179676 | 0.85771854007575 |
| C  | 0.20125753793991 | 2.46416171582054 | 1.33835343398307 |
| C  | 0.27908204739663 | 2.59339878310166 | 2.69420940359598 |
| C  | 1.66217074257428 | 2.42341295133842 | 3.05715801283703 |

|   |                   |                  |                   |
|---|-------------------|------------------|-------------------|
| C | 2.13137437704294  | 2.42475433158945 | 4.37865177175592  |
| C | 1.13673311024099  | 2.53927713016985 | 5.48685509313790  |
| C | 1.12738099772563  | 3.66381177573937 | 6.33127128435966  |
| C | 0.19784182133298  | 3.77437891072883 | 7.36511628389590  |
| C | -0.75233507568036 | 2.76651686948077 | 7.60133505279245  |
| C | -0.73785404297781 | 1.64530372247572 | 6.75901050976632  |
| C | 0.18686611642762  | 1.53190870303887 | 5.71725263449180  |
| C | -1.75016317834664 | 2.89210036991259 | 8.72526619048732  |
| N | 4.54983915757505  | 2.31386918149154 | 3.81914498018144  |
| C | 3.48941711053835  | 2.32123693864168 | 4.71250403077075  |
| C | 3.98061432477121  | 2.20714343892605 | 6.06095466781548  |
| C | 5.34155922609033  | 2.13842217538657 | 5.98894641487001  |
| C | 5.69629844290579  | 2.22764612968805 | 4.59684904872646  |
| C | 7.01300840540038  | 2.28044052673032 | 4.11986734694513  |
| C | 8.13851885865348  | 2.23815152123350 | 5.10046816770481  |
| C | 9.03603086700078  | 1.15542490072229 | 5.10439655280088  |
| C | 10.09372892642166 | 1.10629173254699 | 6.01203426253331  |
| C | 10.30282483239611 | 2.13748360135979 | 6.94330841145967  |
| C | 9.40724461876967  | 3.21670773601875 | 6.93445479900570  |
| C | 8.34107976549902  | 3.26808423944752 | 6.03208663942113  |
| C | 11.45876624979640 | 2.08367383729097 | 7.91047938899504  |
| N | 6.44013587511036  | 2.32549813484668 | 1.70046888014264  |
| C | 7.33084230737269  | 2.40328968052265 | 2.75874040956129  |
| C | 8.65728521551991  | 2.67135266465225 | 2.26719247000014  |
| C | 8.57509107788724  | 2.73880110989584 | 0.90709133663979  |
| C | 7.20075184730116  | 2.49462389595206 | 0.55341464385823  |
| C | 6.73302439951139  | 2.41720261380402 | -0.76613247883556 |
| C | 7.72226368098765  | 2.53104433901904 | -1.87963369905237 |
| C | 8.71031805425817  | 1.55041382346058 | -2.07684809288259 |
| C | 9.62840950863074  | 1.66055166141607 | -3.12140038750880 |
| C | 9.60087104787732  | 2.75387421498689 | -4.00371704787461 |
| C | 8.61648860006996  | 3.73177552466169 | -3.80042267676911 |
| C | 7.68975050456404  | 3.62347165892103 | -2.76029432769177 |
| C | 10.59454976295974 | 2.86515874647161 | -5.13279937360676 |
| N | 4.32191722311954  | 2.21881567268396 | -0.19993360603832 |
| C | 5.38184264601623  | 2.23645048813002 | -1.09392096231229 |
| C | 4.89772342706007  | 2.04307733752540 | -2.43582714964662 |
| C | 3.54124135517203  | 1.91592630962339 | -2.35952113502978 |
| C | 3.18138372132933  | 2.04874095857828 | -0.97210831279030 |
| C | 1.86282502204656  | 2.06546358418034 | -0.49719560570702 |
| C | 0.74305281597196  | 1.94249989292491 | -1.47764381748002 |
| C | -0.11830471052696 | 0.83151832286550 | -1.44219949202260 |
| C | -1.16635386202602 | 0.70965590021557 | -2.35442821341705 |
| C | -1.40117701797243 | 1.69331971027462 | -3.32985635524333 |
| C | -0.54269626327900 | 2.80205833344292 | -3.35886555829434 |
| C | 0.51329602363088  | 2.92636280801202 | -2.45201075843350 |

|   |                   |                   |                   |
|---|-------------------|-------------------|-------------------|
| C | -2.54338357464624 | 1.55912370310010  | -4.30553878700790 |
| H | -0.68034819762883 | 2.54647022937105  | 0.71133839531433  |
| H | -0.52694112550994 | 2.80020404398989  | 3.39028186988206  |
| H | 1.84942878835727  | 4.46558215704600  | 6.16592722112678  |
| H | 0.20859011741957  | 4.66429389502683  | 7.99911740489283  |
| H | -1.46057385943357 | 0.84216183965431  | 6.92109106510352  |
| H | 0.17897588001544  | 0.64401635607217  | 5.08235065795553  |
| H | -2.43037230794632 | 2.03087573070083  | 8.75241746979428  |
| H | -2.35650806626913 | 3.80430256465111  | 8.61736796203312  |
| H | -1.24346931568762 | 2.95699309450565  | 9.70046819905871  |
| H | 3.36000968008102  | 2.17451057174704  | 6.95021348934564  |
| H | 6.04550498129614  | 2.03970720487600  | 6.80847324238329  |
| H | 8.89387876429405  | 0.33839055592196  | 4.39467374080911  |
| H | 10.76921149014180 | 0.24751961379812  | 5.99833008854717  |
| H | 9.54640277231438  | 4.03656303438682  | 7.64299567689476  |
| H | 7.66653698343666  | 4.12626832393532  | 6.04228575328951  |
| H | 11.42431294213751 | 2.91979931357850  | 8.62116555234042  |
| H | 12.42188818079890 | 2.13061795841983  | 7.37867660223996  |
| H | 11.45468259386212 | 1.14468924679181  | 8.48411982428126  |
| H | 9.53414536941304  | 2.81700045051103  | 2.88939597189955  |
| H | 9.37239714560765  | 2.94876464071863  | 0.20191010765817  |
| H | 8.75064641448951  | 0.68667650950923  | -1.41054889671142 |
| H | 10.37948440652865 | 0.87828859014552  | -3.25518712540553 |
| H | 8.57483768733537  | 4.59796249692508  | -4.46483405911772 |
| H | 6.93937250805191  | 4.40411627942079  | -2.62233021919194 |
| H | 10.47611642778049 | 3.81238961134368  | -5.67534738349438 |
| H | 10.46828181518418 | 2.04308580550135  | -5.85440276679078 |
| H | 11.62868522221637 | 2.80958236482706  | -4.76073719246690 |
| H | 5.51991490193877  | 2.00118288927224  | -3.32359315519027 |
| H | 2.84284450980206  | 1.75144884108233  | -3.17321848578504 |
| H | 0.04524824807176  | 0.04901236429712  | -0.69891616349208 |
| H | -1.81288212853988 | -0.17011244348548 | -2.30933487254692 |
| H | -0.70350392685032 | 3.58655514952847  | -4.10211729390035 |
| H | 1.15952576254383  | 3.80508914998591  | -2.49336324478198 |
| H | -2.53933248283443 | 2.37674650970804  | -5.03806673185439 |
| H | -3.51332432236604 | 1.57466373851103  | -3.78457441704312 |
| H | -2.48866619598261 | 0.60638185789041  | -4.85345788402699 |

### CALWER<sup>33</sup>

N,N'-Ethylene-bis(salicylideneaminato)-oxo-chromium(V) hexafluorophosphate acetonitrile solvate

Charge = 1

Spin Multiplicity = 2

|    |           |           |           |
|----|-----------|-----------|-----------|
| Cr | 0.005227  | 0.052981  | -0.099640 |
| O  | 0.012735  | 0.243265  | 1.453965  |
| O  | -1.308464 | -1.150898 | -0.565218 |
| C  | -2.635947 | -1.027008 | -0.598936 |
| C  | -3.418682 | -2.192957 | -0.533246 |
| C  | -4.803924 | -2.098727 | -0.599732 |
| C  | -5.449454 | -0.853440 | -0.745225 |
| C  | -4.693713 | 0.299937  | -0.827179 |
| C  | -3.276872 | 0.240968  | -0.747823 |
| C  | -2.521599 | 1.428258  | -0.882231 |
| N  | -1.207686 | 1.509519  | -0.765329 |
| C  | -0.552578 | 2.721118  | -0.980154 |
| O  | 1.209914  | -1.260830 | -0.562908 |
| N  | 1.341223  | 1.397855  | -0.764298 |
| C  | 0.794665  | 2.662056  | -0.979594 |
| C  | 2.543174  | -1.253033 | -0.593325 |
| C  | 2.643261  | 1.202407  | -0.879582 |
| C  | 3.221334  | -2.482514 | -0.523346 |
| C  | 3.292256  | -0.045820 | -0.742618 |
| C  | 4.609663  | -2.509233 | -0.586275 |
| C  | 4.709046  | -0.110505 | -0.818841 |
| C  | 5.361380  | -1.325083 | -0.732552 |
| H  | -2.919431 | -3.156009 | -0.429493 |
| H  | -5.399913 | -3.010631 | -0.541748 |
| H  | -6.536575 | -0.804489 | -0.797484 |
| H  | -5.170867 | 1.273476  | -0.950554 |
| H  | -3.056303 | 2.354579  | -1.122259 |
| H  | -1.134031 | 3.627545  | -1.144619 |
| H  | 1.453292  | 3.514218  | -1.143141 |
| H  | 3.256815  | 2.078407  | -1.119965 |
| H  | 2.639971  | -3.398288 | -0.419157 |
| H  | 5.123951  | -3.469374 | -0.524811 |
| H  | 5.269417  | 0.817547  | -0.942844 |
| H  | 6.448764  | -1.370975 | -0.782096 |

### CAMWOC<sup>34</sup>

( $\sigma^1(\text{C}_2), \eta^3(\text{C}_{4-6})$ )-3-t-Butyl-1-methyl-1-oxo-5-phenyl-1-thiacyclohexene)-dicarbonyl-nitrosyl-chromium

Charge = 0

Spin Multiplicity = 1

|    |           |           |           |
|----|-----------|-----------|-----------|
| Cr | -0.019455 | 0.000783  | 0.010678  |
| S  | -0.935642 | -1.561874 | -2.213125 |
| C  | 1.002267  | 1.552234  | -0.031475 |

|   |           |           |           |
|---|-----------|-----------|-----------|
| C | -1.583471 | 0.996344  | -0.068245 |
| C | -2.637313 | -0.944371 | -2.189603 |
| H | -3.017718 | -0.924090 | -1.166284 |
| H | -3.197091 | -1.647394 | -2.814572 |
| H | -2.643648 | 0.056978  | -2.633055 |
| C | -0.549899 | -2.022846 | -0.582700 |
| C | 0.849159  | -2.017749 | -0.200764 |
| C | 1.783179  | -1.136215 | -0.778342 |
| C | 1.624747  | -0.522973 | -2.156656 |
| C | 0.126400  | -0.178283 | -2.216318 |
| H | -1.246705 | -2.712507 | -0.108459 |
| H | 2.776016  | -1.128584 | -0.327314 |
| H | 2.091206  | 0.475111  | -2.122552 |
| H | -0.190319 | 0.556434  | -2.961734 |
| C | 2.167899  | -2.445192 | 1.922367  |
| C | 2.564997  | -3.291401 | 2.957598  |
| C | 2.050849  | -4.590123 | 3.045595  |
| C | 1.135074  | -5.033673 | 2.088540  |
| C | 0.733772  | -4.185265 | 1.052772  |
| C | 1.246195  | -2.880241 | 0.953442  |
| H | 2.560717  | -1.428569 | 1.878970  |
| H | 3.273003  | -2.931281 | 3.705691  |
| H | 2.361399  | -5.249940 | 3.857053  |
| H | 0.731395  | -6.045931 | 2.142632  |
| H | 0.034585  | -4.552293 | 0.299909  |
| C | 2.401915  | -1.247499 | -3.330988 |
| C | 2.356926  | -2.782418 | -3.246935 |
| H | 1.333818  | -3.170051 | -3.322606 |
| H | 2.797143  | -3.144293 | -2.305745 |
| H | 2.944696  | -3.212189 | -4.072811 |
| C | 1.837648  | -0.773060 | -4.680663 |
| H | 0.807803  | -1.124965 | -4.834281 |
| H | 2.453594  | -1.163239 | -5.505311 |
| H | 1.841361  | 0.326086  | -4.752404 |
| C | 3.876912  | -0.803066 | -3.225575 |
| H | 4.478891  | -1.285524 | -4.010206 |
| H | 4.315400  | -1.079927 | -2.254597 |
| H | 3.974593  | 0.287158  | -3.345534 |
| N | -0.108200 | -0.025272 | 1.706027  |
| O | -0.217152 | 0.026118  | 2.884963  |
| O | 1.651725  | 2.518791  | -0.024996 |
| O | -2.536340 | 1.668100  | -0.075941 |
| O | -0.892922 | -2.595633 | -3.278557 |

CATLAL<sup>35</sup>

Bis(tetraphenylarsonium) tetrakis(isothiocyanato)-nitrido-chromium(V) toluene solvate

Charge = -2

Spin Multiplicity = -2

|    |                    |                    |                   |
|----|--------------------|--------------------|-------------------|
| Cr | -6.53107212420862  | -6.01886971133909  | 8.12282014516321  |
| N  | -5.23576930235402  | -6.01808217432631  | 8.95008777151962  |
| N  | -7.95811689050525  | -6.01672242487658  | 9.47986109391392  |
| C  | -8.82468364615304  | -6.01360536344337  | 10.28828566977702 |
| S  | -10.01306917223059 | -6.01591891823557  | 11.39926510279766 |
| N  | -6.93653522949726  | -7.92896645055461  | 7.86617350269650  |
| C  | -7.19872801495927  | -9.07370315280932  | 7.70660326109988  |
| S  | -7.55597887754637  | -10.64421110788401 | 7.47820702172095  |
| N  | -5.90730513998644  | -6.02107789894941  | 6.25478045094779  |
| C  | -5.56531884243664  | -6.01139429193185  | 5.12009286459707  |
| S  | -5.09389356409310  | -5.99986043168000  | 3.56295189646495  |
| N  | -6.93562242019305  | -4.10934863138342  | 7.86089724604955  |
| C  | -7.19628071199404  | -2.96451525629430  | 7.69961926819579  |
| S  | -7.55252406384236  | -1.39367418629213  | 7.47188270505608  |

**CATYOM**<sup>36</sup>

((Z)-(η<sup>2</sup>-Allylamino)(ferrocenyl)methylidene)-cis-tetracarbonyl-chromium(0)

Charge = 0

Spin Multiplicity = 1

|    |          |           |           |
|----|----------|-----------|-----------|
| Cr | 5.120341 | 1.465554  | 2.535847  |
| Fe | 6.457685 | 1.807009  | 6.958902  |
| O  | 7.429824 | -0.320600 | 3.261954  |
| O  | 5.481405 | 0.521569  | -0.317545 |
| O  | 3.380672 | -0.951836 | 3.172037  |
| O  | 7.302649 | 3.545730  | 2.115955  |
| N  | 4.087273 | 3.504267  | 4.372910  |
| H  | 3.776892 | 3.972792  | 5.227050  |
| C  | 6.524869 | 0.385600  | 3.026674  |
| C  | 5.327622 | 0.895571  | 0.781710  |
| C  | 4.020276 | -0.007705 | 2.934489  |
| C  | 6.441194 | 2.778138  | 2.280654  |
| C  | 4.667501 | 2.309865  | 4.409301  |
| C  | 4.797681 | 1.750771  | 5.752460  |
| C  | 4.518256 | 2.412356  | 7.021099  |
| H  | 4.183143 | 3.436606  | 7.167200  |
| C  | 4.767309 | 1.484068  | 8.078301  |
| H  | 4.666304 | 1.689120  | 9.140806  |
| C  | 5.221558 | 0.254754  | 7.496961  |

|   |          |           |          |
|---|----------|-----------|----------|
| H | 5.524722 | -0.634738 | 8.042468 |
| C | 5.254451 | 0.414634  | 6.078973 |
| H | 5.567281 | -0.335933 | 5.362127 |
| C | 7.962336 | 2.865162  | 6.026514 |
| H | 7.880299 | 3.345104  | 5.055399 |
| C | 7.636624 | 3.462692  | 7.287284 |
| H | 7.274926 | 4.475811  | 7.440550 |
| C | 7.845600 | 2.476239  | 8.309138 |
| H | 7.665541 | 2.609702  | 9.372420 |
| C | 8.299508 | 1.270374  | 7.675244 |
| H | 8.521764 | 0.331543  | 8.175295 |
| C | 8.368320 | 1.509978  | 6.262233 |
| H | 8.651701 | 0.786703  | 5.503254 |
| C | 3.923174 | 4.253213  | 3.127866 |
| H | 4.762698 | 4.957078  | 3.009431 |
| H | 3.003302 | 4.855354  | 3.206637 |
| C | 3.856670 | 3.297603  | 1.961487 |
| H | 4.222323 | 3.680098  | 1.008444 |
| C | 3.003499 | 2.202775  | 1.974304 |
| H | 2.352713 | 2.031844  | 2.832471 |
| H | 2.710742 | 1.719189  | 1.044495 |

### CECVUB<sup>37</sup>

Triphenyl-tris(tetrahydrofuran)-chromium(III)

Charge = 0

Spin Multiplicity = 4

|    |           |           |           |
|----|-----------|-----------|-----------|
| Cr | 0.019094  | -0.023986 | 0.053069  |
| O  | 0.349867  | 2.247628  | -0.086378 |
| C  | -0.732805 | 3.228296  | -0.230591 |
| C  | -0.039972 | 4.574260  | -0.392657 |
| C  | 1.197354  | 4.405959  | 0.501401  |
| C  | 1.592326  | 2.954012  | 0.245348  |
| O  | 2.303742  | -0.048699 | 0.090181  |
| C  | 3.084229  | -0.410474 | 1.282905  |
| C  | 4.496739  | -0.703489 | 0.785307  |
| C  | 4.604327  | 0.185407  | -0.462315 |
| C  | 3.205773  | 0.068719  | -1.055134 |
| O  | 0.358259  | 0.074438  | -2.223590 |
| C  | 0.316610  | 1.295602  | -3.028617 |
| C  | 0.679751  | 0.867374  | -4.444790 |
| C  | 0.065876  | -0.538051 | -4.519160 |
| C  | 0.330712  | -1.090509 | -3.121672 |
| C  | -2.016965 | 0.296995  | -0.122399 |

|   |           |           |           |
|---|-----------|-----------|-----------|
| C | -2.852052 | 0.714171  | 0.939561  |
| C | -4.224479 | 0.946897  | 0.776579  |
| C | -4.828937 | 0.767710  | -0.472182 |
| C | -4.037928 | 0.348382  | -1.547047 |
| C | -2.667320 | 0.119651  | -1.365945 |
| C | -0.142045 | -2.079472 | -0.083031 |
| C | 0.998876  | -2.881754 | -0.316779 |
| C | 0.942581  | -4.280560 | -0.390955 |
| C | -0.277918 | -4.943993 | -0.230157 |
| C | -1.430036 | -4.185011 | 0.005231  |
| C | -1.355761 | -2.787863 | 0.075156  |
| C | 0.018408  | -0.032331 | 2.125919  |
| C | 0.038910  | 1.183755  | 2.849480  |
| C | 0.067300  | 1.238398  | 4.249747  |
| C | 0.075073  | 0.057854  | 4.999282  |
| C | 0.050330  | -1.165985 | 4.322011  |
| C | 0.023327  | -1.201845 | 2.921267  |
| H | -1.356627 | 3.192931  | 0.675518  |
| H | -1.344269 | 2.922534  | -1.086983 |
| H | 0.256611  | 4.736580  | -1.439755 |
| H | -0.685875 | 5.406055  | -0.082933 |
| H | 2.011045  | 5.099592  | 0.253018  |
| H | 0.929134  | 4.553270  | 1.557970  |
| H | 2.044088  | 2.459043  | 1.113184  |
| H | 2.272551  | 2.866386  | -0.616597 |
| H | 3.053890  | 0.445756  | 1.973400  |
| H | 2.591241  | -1.264832 | 1.760137  |
| H | 4.598505  | -1.763687 | 0.510134  |
| H | 5.252681  | -0.472351 | 1.546808  |
| H | 5.376811  | -0.149108 | -1.166900 |
| H | 4.818923  | 1.226746  | -0.179790 |
| H | 3.103968  | -0.833474 | -1.679804 |
| H | 2.895814  | 0.942559  | -1.640309 |
| H | 1.016715  | 2.012916  | -2.584403 |
| H | -0.703219 | 1.710174  | -2.979727 |
| H | 1.772018  | 0.821157  | -4.567861 |
| H | 0.274979  | 1.556751  | -5.197141 |
| H | -1.015029 | -0.474186 | -4.712968 |
| H | 0.517572  | -1.166863 | -5.297242 |
| H | -0.438735 | -1.779532 | -2.755311 |
| H | 1.309884  | -1.588341 | -3.054005 |
| H | -2.420561 | 0.859231  | 1.932287  |
| H | -4.826281 | 1.266662  | 1.632198  |
| H | -5.898472 | 0.945510  | -0.604393 |
| H | -4.490720 | 0.194749  | -2.530783 |
| H | -2.093316 | -0.221547 | -2.230489 |



|   |           |           |           |
|---|-----------|-----------|-----------|
| H | 1.974938  | -2.408009 | -0.447540 |
| H | 1.855974  | -4.853774 | -0.573921 |
| H | -0.330408 | -6.033583 | -0.284980 |
| H | -2.394002 | -4.684931 | 0.136384  |
| H | -2.275482 | -2.230709 | 0.264439  |
| H | 0.016099  | 2.133105  | 2.309670  |
| H | 0.079587  | 2.207653  | 4.756437  |
| H | 0.094730  | 0.091091  | 6.090817  |
| H | 0.049041  | -2.101793 | 4.888278  |
| H | -0.000074 | -2.178255 | 2.433567  |

### CEDRYL10<sup>38</sup>

Cedryl chromate

Charge = 0

Spin Multiplicity = 1

|    |           |           |           |
|----|-----------|-----------|-----------|
| Cr | 0.314443  | -0.060275 | 0.182945  |
| C  | 0.643130  | 2.886394  | 0.314780  |
| C  | 1.437790  | -2.272639 | -1.437295 |
| C  | 1.932011  | 3.045549  | 1.166151  |
| C  | 2.907034  | -2.763367 | -1.602489 |
| C  | 1.916392  | 4.469668  | 1.763441  |
| C  | 2.873565  | -4.023593 | -2.488047 |
| C  | -0.628510 | 2.963052  | 1.174863  |
| C  | 0.850349  | -1.789631 | -2.770478 |
| C  | 1.918368  | 7.952314  | 0.670352  |
| C  | 1.736383  | -7.615767 | -1.370069 |
| C  | 4.414687  | 2.725600  | 1.446610  |
| C  | 5.171154  | -3.259090 | -0.636174 |
| C  | 3.486818  | 2.025050  | -0.727949 |
| C  | 3.459185  | -2.527383 | 0.979884  |
| C  | 0.595765  | 3.918930  | -0.831205 |
| C  | 0.556860  | -3.357544 | -0.783937 |
| C  | 0.997330  | 5.339289  | -0.377108 |
| C  | 0.799999  | -4.769287 | -1.358685 |
| C  | 2.245032  | 5.331744  | 0.528966  |
| C  | 2.300856  | -5.077532 | -1.515832 |
| C  | 2.838478  | 6.743791  | 0.855331  |
| C  | 2.662811  | -6.529607 | -1.936629 |
| C  | 4.136106  | 6.808101  | 0.021994  |
| C  | 4.106272  | -6.685610 | -1.403835 |
| C  | 4.675702  | 5.371525  | 0.080533  |
| C  | 4.095063  | -5.967383 | -0.039783 |
| C  | 3.409997  | 4.521778  | -0.145900 |

|   |           |           |           |
|---|-----------|-----------|-----------|
| C | 3.097371  | -4.787372 | -0.191151 |
| C | 3.318640  | 3.049713  | 0.406733  |
| C | 3.656912  | -3.312927 | -0.327977 |
| H | 1.279535  | 3.584158  | -1.622859 |
| H | 0.778157  | -3.369852 | 0.292449  |
| H | 3.237089  | 4.490256  | -1.234490 |
| H | 2.412114  | -4.799029 | 0.669466  |
| H | 1.916505  | 2.258984  | 1.937821  |
| H | 3.475876  | -1.935702 | -2.054040 |
| H | 0.969615  | 4.746461  | 2.246562  |
| H | 2.268892  | -3.923727 | -3.399265 |
| H | 2.703768  | 4.568972  | 2.524761  |
| H | 3.891720  | -4.284028 | -2.807950 |
| H | -0.548084 | 2.316757  | 2.059517  |
| H | 0.655701  | -2.627160 | -3.451776 |
| H | -0.821838 | 3.989451  | 1.509854  |
| H | -0.108097 | -1.285926 | -2.583337 |
| H | -1.489054 | 2.639074  | 0.573512  |
| H | 1.532501  | -1.085530 | -3.267015 |
| H | 2.439529  | 8.876015  | 0.965031  |
| H | 2.101303  | -8.612017 | -1.662128 |
| H | 1.605138  | 8.070762  | -0.377824 |
| H | 1.691727  | -7.587749 | -0.270407 |
| H | 1.010546  | 7.875645  | 1.287603  |
| H | 0.708704  | -7.516452 | -1.747628 |
| H | -0.413094 | 3.927227  | -1.270933 |
| H | -0.502087 | -3.077786 | -0.885915 |
| H | 4.391139  | 3.386175  | 2.323995  |
| H | 5.759160  | -3.629249 | 0.215646  |
| H | 4.292534  | 1.691687  | 1.803741  |
| H | 5.458059  | -3.846469 | -1.519109 |
| H | 5.415007  | 2.805626  | 0.996467  |
| H | 5.475081  | -2.216259 | -0.813592 |
| H | 2.771774  | 2.172568  | -1.546726 |
| H | 3.797876  | -1.486354 | 0.877081  |
| H | 4.501055  | 2.116191  | -1.148776 |
| H | 2.414882  | -2.504843 | 1.315354  |
| H | 3.369523  | 0.993127  | -0.367211 |
| H | 4.057163  | -2.997533 | 1.777069  |
| H | 1.176141  | 5.944830  | -1.280032 |
| H | 0.320419  | -5.491606 | -0.681107 |
| H | 0.159070  | 5.814215  | 0.158402  |
| H | 0.301949  | -4.875983 | -2.337385 |
| H | 3.141272  | 6.719374  | 1.917653  |
| H | 2.646049  | -6.610280 | -3.036883 |
| H | 3.896244  | 7.081815  | -1.020881 |

|   |           |           |           |
|---|-----------|-----------|-----------|
| H | 4.412716  | -7.739931 | -1.328783 |
| H | 4.846078  | 7.558508  | 0.402588  |
| H | 4.817143  | -6.194273 | -2.086573 |
| H | 5.463557  | 5.171799  | -0.660810 |
| H | 3.726042  | -6.654190 | 0.736780  |
| H | 5.107834  | 5.187941  | 1.076414  |
| H | 5.099020  | -5.655001 | 0.276504  |
| O | 0.625870  | 1.571824  | -0.339926 |
| O | 1.494096  | -1.099695 | -0.561092 |
| O | 0.457815  | -0.165520 | 1.769493  |
| O | -1.158795 | -0.493347 | -0.257148 |

### CIQQUAU<sup>39</sup>

Dichloro-oxo-(spiro(adamantane-2,2'-homoadamantan-3-on-4-olato))-chromium(V)  
dichloromethane solvate

Charge = 0

Spin Multiplicity = 2

|    |           |           |           |
|----|-----------|-----------|-----------|
| Cr | 0.034431  | -0.039285 | -0.049095 |
| Cl | 1.925181  | -0.695782 | -1.004930 |
| Cl | -1.008045 | -1.954961 | -0.533443 |
| O  | 0.097534  | -0.069880 | 1.515280  |
| O  | 0.831699  | 1.839399  | -0.201134 |
| O  | -1.313635 | 0.868914  | -0.801555 |
| C  | -1.390153 | 2.298622  | -0.706222 |
| C  | -2.111687 | 2.777205  | -1.984859 |
| H  | -1.443652 | 2.654948  | -2.850598 |
| H  | -2.944728 | 2.071211  | -2.124249 |
| C  | -2.664866 | 4.208446  | -1.901537 |
| H  | -3.275020 | 4.369980  | -2.804451 |
| C  | -3.543760 | 4.365772  | -0.651851 |
| H  | -3.968697 | 5.381758  | -0.621348 |
| H  | -4.388327 | 3.658413  | -0.679091 |
| C  | -2.681597 | 4.115134  | 0.594779  |
| H  | -3.296447 | 4.237947  | 1.500614  |
| C  | -2.191754 | 2.662541  | 0.577816  |
| H  | -3.053389 | 1.977165  | 0.578677  |
| H  | -1.590982 | 2.427442  | 1.470071  |
| C  | -1.528978 | 5.133891  | 0.660175  |
| H  | -0.906877 | 4.940139  | 1.547906  |
| H  | -1.971879 | 6.131191  | 0.814435  |
| C  | -0.652572 | 5.208852  | -0.617740 |
| H  | -0.166869 | 6.187437  | -0.577276 |
| C  | -1.551450 | 5.262140  | -1.876011 |

|   |           |          |           |
|---|-----------|----------|-----------|
| H | -2.026506 | 6.257299 | -1.891582 |
| H | -0.951201 | 5.201075 | -2.794673 |
| C | 0.048274  | 2.768286 | -0.511472 |
| C | 0.551124  | 4.190306 | -0.646636 |
| C | 1.619495  | 4.570640 | 0.472453  |
| H | 1.138297  | 4.485371 | 1.458248  |
| C | 2.107196  | 6.026260 | 0.262319  |
| H | 1.300266  | 6.763373 | 0.375576  |
| H | 2.834014  | 6.250603 | 1.059975  |
| C | 2.793212  | 6.163800 | -1.112800 |
| H | 3.092014  | 7.212490 | -1.269874 |
| C | 4.034395  | 5.252776 | -1.150462 |
| H | 4.754612  | 5.561455 | -0.374593 |
| H | 4.543369  | 5.345162 | -2.124672 |
| C | 3.592470  | 3.796482 | -0.914928 |
| H | 4.470532  | 3.131538 | -0.930441 |
| C | 2.613017  | 3.373766 | -2.025748 |
| H | 2.347862  | 2.312987 | -1.920207 |
| H | 3.096295  | 3.477914 | -3.011400 |
| C | 1.361968  | 4.276130 | -2.022991 |
| H | 0.703969  | 3.977083 | -2.851430 |
| C | 1.823444  | 5.738410 | -2.233114 |
| H | 2.337203  | 5.786264 | -3.207402 |
| H | 0.971271  | 6.429279 | -2.298733 |
| C | 2.891653  | 3.689884 | 0.451893  |
| H | 3.563487  | 4.062705 | 1.243146  |
| H | 2.669399  | 2.645394 | 0.692895  |

### COZYAR<sup>40</sup>

Carbonyl-( $\eta^5$ -cyclopentadienyl)-(diphenylcarbene)-nitrosyl-chromium

Charge = 0

Spin Multiplicity = 1

|    |           |           |           |
|----|-----------|-----------|-----------|
| Cr | 0.013888  | -0.053759 | 0.013078  |
| O  | 2.779927  | -1.252975 | -0.163877 |
| O  | 0.048328  | -0.175472 | 2.870064  |
| N  | 0.088734  | -0.035077 | 1.684662  |
| C  | 1.712521  | -0.790236 | -0.121592 |
| C  | -2.202034 | -0.173812 | -0.197118 |
| C  | -1.673381 | 0.344285  | -1.418182 |
| C  | -0.839362 | -0.650499 | -1.994133 |
| C  | -0.847882 | -1.789724 | -1.123186 |
| C  | -1.702794 | -1.502818 | -0.027783 |
| C  | 0.823832  | 1.650876  | -0.375966 |

|   |           |           |           |
|---|-----------|-----------|-----------|
| C | 1.283145  | 2.598604  | 0.659532  |
| C | 2.551036  | 3.217885  | 0.544693  |
| C | 3.021392  | 4.086152  | 1.529547  |
| C | 2.217026  | 4.404290  | 2.629653  |
| C | 0.944894  | 3.832238  | 2.741702  |
| C | 0.491453  | 2.928402  | 1.780711  |
| C | 1.064081  | 2.133526  | -1.753472 |
| C | 1.668322  | 1.340901  | -2.752669 |
| C | 1.866430  | 1.832239  | -4.044461 |
| C | 1.437935  | 3.119190  | -4.384555 |
| C | 0.832878  | 3.921873  | -3.410393 |
| C | 0.670654  | 3.446632  | -2.109610 |
| H | -2.866893 | 0.348817  | 0.485055  |
| H | -1.867646 | 1.331729  | -1.825509 |
| H | -0.294879 | -0.567868 | -2.928744 |
| H | -0.304140 | -2.716503 | -1.283544 |
| H | -1.901406 | -2.154918 | 0.818230  |
| H | 3.180533  | 2.987142  | -0.316054 |
| H | 4.015853  | 4.525654  | 1.432437  |
| H | 2.576931  | 5.097871  | 3.391455  |
| H | 0.302860  | 4.088227  | 3.586405  |
| H | -0.500799 | 2.487761  | 1.873005  |
| H | 2.018361  | 0.340387  | -2.500362 |
| H | 2.359514  | 1.204434  | -4.788863 |
| H | 1.582623  | 3.497657  | -5.397740 |
| H | 0.496558  | 4.929266  | -3.662665 |
| H | 0.209878  | 4.086493  | -1.355490 |

### CPNOCC10<sup>41</sup>

Isocyanato-cyclopentadienyl-dinitrosyl-chromium

Charge = 0

Spin Multiplicity = 1

|    |           |           |           |
|----|-----------|-----------|-----------|
| Cr | 0.028353  | 0.000097  | 0.015953  |
| C  | -0.024804 | -0.000407 | 3.165829  |
| C  | -2.228464 | 0.000249  | 0.290118  |
| C  | -1.839364 | -1.153777 | -0.440980 |
| C  | -1.215134 | -0.709919 | -1.656269 |
| H  | -2.680372 | 0.000416  | 1.276755  |
| H  | -1.977503 | -2.185789 | -0.131665 |
| H  | -0.802795 | -1.348809 | -2.431707 |
| N  | 0.029733  | 0.000013  | 1.975519  |
| N  | 1.145833  | -1.250149 | -0.304556 |
| O  | -0.076184 | -0.000743 | 4.374538  |

|   |           |           |           |
|---|-----------|-----------|-----------|
| O | 1.856421  | -2.084294 | -0.723208 |
| C | -1.839286 | 1.153947  | -0.441433 |
| C | -1.215060 | 0.709564  | -1.656540 |
| N | 1.145644  | 1.250541  | -0.304358 |
| H | -1.977276 | 2.186078  | -0.132456 |
| H | -0.802661 | 1.348100  | -2.432232 |
| O | 1.856117  | 2.084881  | -0.722886 |

### CRCAAZ<sup>42</sup>

Chromium tricarbonyl-1-ethoxy-3-oxo-3a-phenyl-3,3a-dihydroazulene

Charge = 0

Spin Multiplicity = 1

|    |           |           |           |
|----|-----------|-----------|-----------|
| Cr | 3.536627  | -2.565917 | -1.132413 |
| C  | 6.723472  | -4.731323 | -1.906419 |
| C  | 6.364028  | -3.302491 | -1.356343 |
| C  | 7.685863  | -2.623819 | -0.972079 |
| C  | 8.421285  | -1.929114 | -1.944999 |
| C  | 9.659672  | -1.363042 | -1.631605 |
| C  | 10.184171 | -1.484277 | -0.340973 |
| C  | 9.460251  | -2.179071 | 0.632204  |
| C  | 8.221968  | -2.746910 | 0.317450  |
| C  | 4.921799  | -7.059923 | 1.222957  |
| C  | 4.132476  | -7.416834 | 2.461820  |
| C  | 2.252615  | -1.676537 | -2.094431 |
| C  | 6.258720  | -5.714482 | -0.956550 |
| C  | 2.130861  | -2.972936 | -0.015579 |
| C  | 3.189838  | -4.109966 | -2.085787 |
| C  | 5.503003  | -5.089040 | 0.011513  |
| C  | 5.447322  | -3.640785 | -0.198621 |
| C  | 4.844372  | -2.738851 | 0.675256  |
| C  | 4.606578  | -1.353075 | 0.414203  |
| C  | 4.703154  | -0.687421 | -0.825200 |
| C  | 5.035002  | -1.247288 | -2.102434 |
| C  | 5.537092  | -2.521289 | -2.353484 |
| O  | 7.300196  | -4.915345 | -2.979324 |
| O  | 4.844854  | -5.605309 | 1.045433  |
| O  | 1.397255  | -1.136590 | -2.681051 |
| O  | 1.199897  | -3.217347 | 0.646697  |
| O  | 2.965311  | -5.082923 | -2.687533 |
| H  | 8.025372  | -1.826572 | -2.956155 |
| H  | 10.215837 | -0.824080 | -2.400575 |
| H  | 11.149239 | -1.038558 | -0.094811 |
| H  | 9.858130  | -2.280145 | 1.643436  |

|   |          |           |           |
|---|----------|-----------|-----------|
| H | 7.671775 | -3.285445 | 1.090802  |
| H | 5.983129 | -7.333453 | 1.317783  |
| H | 4.507849 | -7.532765 | 0.320149  |
| H | 4.551140 | -6.928337 | 3.352062  |
| H | 4.177498 | -8.504463 | 2.612560  |
| H | 3.078407 | -7.127091 | 2.356685  |
| H | 6.429982 | -6.781482 | -1.068333 |
| H | 4.446745 | -3.129133 | 1.613303  |
| H | 4.166921 | -0.779712 | 1.230512  |
| H | 4.328467 | 0.336585  | -0.838925 |
| H | 4.743427 | -0.643544 | -2.963771 |
| H | 5.567649 | -2.848718 | -3.394228 |

### DERNOE<sup>43</sup>

bis(1,1'-Methylene-3,3'-bis(2,6-di-isopropylphenyl)-2,3-dihydroimidazole-2,2'-diylidene)-triphenyl-chromium(III) tetrahydrofuran solvate

Charge = 0

Spin Multiplicity = 4

|    |           |           |           |
|----|-----------|-----------|-----------|
| Cr | -0.077709 | 0.030689  | 0.024393  |
| N  | 2.280317  | -2.333332 | -0.876075 |
| N  | 0.683326  | -2.989970 | 0.388556  |
| N  | -3.121239 | -1.465065 | -0.601409 |
| N  | -1.688581 | -2.613719 | 0.499449  |
| C  | 1.288481  | -0.187453 | 2.716396  |
| H  | 2.202549  | -0.282084 | 2.125784  |
| C  | 1.381815  | -0.261981 | 4.111977  |
| H  | 2.355560  | -0.414573 | 4.585279  |
| C  | 0.233405  | -0.139105 | 4.903014  |
| H  | 0.301004  | -0.197241 | 5.991306  |
| C  | -1.002383 | 0.064537  | 4.277673  |
| H  | -1.907851 | 0.169461  | 4.881466  |
| C  | -1.082475 | 0.137847  | 2.881083  |
| H  | -2.060107 | 0.302449  | 2.421598  |
| C  | 0.055720  | 0.006096  | 2.053017  |
| C  | -1.429328 | 2.759530  | 0.778007  |
| H  | -1.089960 | 2.600512  | 1.805238  |
| C  | -2.064679 | 3.969676  | 0.471526  |
| H  | -2.218087 | 4.718257  | 1.254821  |
| C  | -2.501932 | 4.227535  | -0.832372 |
| H  | -2.998231 | 5.169581  | -1.076943 |
| C  | -2.290247 | 3.258212  | -1.818606 |
| H  | -2.627569 | 3.437032  | -2.843162 |
| C  | -1.651232 | 2.056783  | -1.491831 |

|   |           |           |           |
|---|-----------|-----------|-----------|
| H | -1.499640 | 1.332541  | -2.301482 |
| C | -1.199670 | 1.758143  | -0.188333 |
| C | 1.834984  | 1.444352  | -1.759406 |
| H | 1.383965  | 0.775946  | -2.503132 |
| C | 2.749367  | 2.396747  | -2.224376 |
| H | 2.995549  | 2.444782  | -3.288565 |
| C | 3.353921  | 3.281326  | -1.325106 |
| H | 4.068683  | 4.028746  | -1.677304 |
| C | 3.025904  | 3.193130  | 0.032604  |
| H | 3.486645  | 3.879948  | 0.749118  |
| C | 2.108088  | 2.233347  | 0.477046  |
| H | 1.864310  | 2.205912  | 1.542799  |
| C | 1.479489  | 1.324022  | -0.398859 |
| C | 3.096676  | -1.582982 | -3.076706 |
| C | 4.113732  | -0.982126 | -3.831316 |
| H | 4.020217  | -0.936105 | -4.916921 |
| C | 5.246316  | -0.448365 | -3.220458 |
| H | 6.024740  | 0.017348  | -3.827609 |
| C | 5.390155  | -0.517648 | -1.837048 |
| H | 6.287010  | -0.108559 | -1.370137 |
| C | 4.407342  | -1.110897 | -1.032981 |
| C | 3.257280  | -1.616135 | -1.675611 |
| C | 1.908617  | -2.227993 | -3.780720 |
| H | 1.103523  | -2.349863 | -3.040648 |
| C | 2.282554  | -3.630929 | -4.304462 |
| H | 1.410875  | -4.107932 | -4.777212 |
| H | 2.633429  | -4.288317 | -3.497031 |
| H | 3.082923  | -3.561697 | -5.056832 |
| C | 1.359262  | -1.368439 | -4.930353 |
| H | 0.462977  | -1.842216 | -5.354686 |
| H | 2.088355  | -1.265300 | -5.746982 |
| H | 1.085421  | -0.359974 | -4.590507 |
| C | 4.641530  | -1.251737 | 0.465838  |
| H | 3.679334  | -1.507095 | 0.932802  |
| C | 5.138148  | 0.050636  | 1.114576  |
| H | 4.460470  | 0.886075  | 0.893213  |
| H | 6.146030  | 0.318711  | 0.763871  |
| H | 5.195432  | -0.074711 | 2.206134  |
| C | 5.626221  | -2.404476 | 0.755185  |
| H | 5.271567  | -3.360160 | 0.344085  |
| H | 5.758876  | -2.528857 | 1.840450  |
| H | 6.612335  | -2.192395 | 0.314496  |
| C | 1.147151  | -1.859979 | -0.242204 |
| C | 2.485163  | -3.691054 | -0.631689 |
| H | 3.328552  | -4.228247 | -1.046685 |
| C | 1.472327  | -4.107851 | 0.169137  |



|   |           |           |           |
|---|-----------|-----------|-----------|
| H | 1.252009  | -5.078326 | 0.598445  |
| C | -0.497366 | -3.001773 | 1.235748  |
| H | -0.348270 | -2.301360 | 2.066105  |
| H | -0.640070 | -4.016304 | 1.620288  |
| C | -4.789720 | 0.331745  | -0.467487 |
| C | -5.632720 | 1.236160  | -1.127624 |
| H | -6.311644 | 1.857982  | -0.542609 |
| C | -5.624777 | 1.348890  | -2.515378 |
| H | -6.290626 | 2.058862  | -3.009380 |
| C | -4.772899 | 0.549990  | -3.274860 |
| H | -4.786086 | 0.638856  | -4.361571 |
| C | -3.904251 | -0.367944 | -2.668413 |
| C | -3.918227 | -0.445291 | -1.260032 |
| C | -4.891359 | 0.173804  | 1.044595  |
| H | -4.012031 | -0.392689 | 1.383612  |
| C | -4.883679 | 1.522636  | 1.782803  |
| H | -4.008617 | 2.123223  | 1.500387  |
| H | -4.857294 | 1.353089  | 2.869594  |
| H | -5.790080 | 2.107317  | 1.565449  |
| C | -6.148671 | -0.637133 | 1.422780  |
| H | -6.157402 | -1.627106 | 0.945267  |
| H | -7.061214 | -0.104708 | 1.113816  |
| H | -6.193856 | -0.783929 | 2.512404  |
| C | -3.038391 | -1.279398 | -3.530371 |
| H | -2.217432 | -1.656396 | -2.901678 |
| C | -2.412353 | -0.548214 | -4.728795 |
| H | -1.742413 | -1.228158 | -5.272883 |
| H | -1.827897 | 0.327054  | -4.412580 |
| H | -3.176088 | -0.206621 | -5.442242 |
| C | -3.851162 | -2.495997 | -4.022344 |
| H | -3.213035 | -3.169208 | -4.614309 |
| H | -4.686218 | -2.169277 | -4.660654 |
| H | -4.270222 | -3.072911 | -3.186447 |
| C | -1.846001 | -1.375796 | -0.077041 |
| C | -2.793055 | -3.437028 | 0.347282  |
| H | -2.837403 | -4.443636 | 0.746601  |
| C | -3.701383 | -2.708272 | -0.349259 |
| H | -4.702065 | -2.952990 | -0.682256 |

### DERPAS<sup>43</sup>

Dichloro-bis(1,1'-methylene-3,3'-bis(2,6-di-isopropylphenyl)-2,3-dihydroimidazole-2,2'-diylidene)-(tetrahydrofuran)-(p-tolyl)-chromium(III) dichloromethane solvate

Charge = 0

Spin Multiplicity = 4

|    |           |           |           |
|----|-----------|-----------|-----------|
| Cr | 0.036195  | 0.018007  | -0.008295 |
| N  | 0.420481  | 3.250259  | 0.685052  |
| N  | -1.353124 | 2.730132  | -0.406002 |
| N  | -2.864173 | 0.863414  | -0.412892 |
| N  | -3.000728 | -0.982368 | 0.679790  |
| O  | 2.239081  | 0.089043  | -0.204803 |
| Cl | 0.193737  | -0.010729 | 2.371777  |
| Cl | 0.305230  | -2.330743 | -0.108490 |
| C  | -0.218948 | 2.165181  | 0.117092  |
| C  | -1.429480 | 4.097098  | -0.190342 |
| H  | -2.259064 | 4.701226  | -0.538159 |
| C  | -0.304565 | 4.425825  | 0.492049  |
| H  | 0.048848  | 5.383005  | 0.852540  |
| C  | 2.855323  | 3.589541  | 0.586365  |
| C  | 4.084202  | 3.687721  | 1.255389  |
| H  | 4.990556  | 3.887789  | 0.682580  |
| C  | 4.163104  | 3.552988  | 2.638945  |
| H  | 5.129512  | 3.626001  | 3.141156  |
| C  | 3.002924  | 3.356538  | 3.386032  |
| H  | 3.072607  | 3.294096  | 4.472083  |
| C  | 1.745691  | 3.250249  | 2.773289  |
| C  | 1.706510  | 3.313878  | 1.361050  |
| C  | 2.791149  | 3.893634  | -0.905447 |
| H  | 1.820940  | 3.540521  | -1.281481 |
| C  | 2.852314  | 5.418830  | -1.137379 |
| H  | 3.813698  | 5.826154  | -0.789348 |
| H  | 2.049777  | 5.946387  | -0.603324 |
| H  | 2.754653  | 5.645095  | -2.209699 |
| C  | 3.889316  | 3.192416  | -1.719269 |
| H  | 4.890794  | 3.563411  | -1.456431 |
| H  | 3.741231  | 3.382933  | -2.792179 |
| H  | 3.873153  | 2.107064  | -1.558244 |
| C  | 0.488617  | 3.177352  | 3.632761  |
| H  | -0.295527 | 2.695159  | 3.032800  |
| C  | 0.022020  | 4.598372  | 4.019950  |
| H  | 0.783524  | 5.102951  | 4.634501  |
| H  | -0.906130 | 4.542755  | 4.608662  |
| H  | -0.173397 | 5.228954  | 3.142262  |
| C  | 0.668279  | 2.334459  | 4.904426  |
| H  | 1.025321  | 1.326684  | 4.659018  |
| H  | -0.299190 | 2.235715  | 5.417788  |
| H  | 1.366548  | 2.803668  | 5.613958  |
| C  | -2.343927 | 1.988900  | -1.167846 |
| H  | -3.173900 | 2.661537  | -1.403776 |
| H  | -1.878186 | 1.617663  | -2.089455 |

|   |           |           |           |
|---|-----------|-----------|-----------|
| C | -2.075888 | -0.122234 | 0.121502  |
| C | -4.217323 | 0.641853  | -0.213955 |
| H | -4.982434 | 1.319357  | -0.573932 |
| C | -4.301203 | -0.526045 | 0.470311  |
| H | -5.162654 | -1.075583 | 0.826200  |
| C | -2.749058 | -2.234982 | 2.794059  |
| C | -2.629722 | -3.474887 | 3.439375  |
| H | -2.564996 | -3.505616 | 4.527251  |
| C | -2.607194 | -4.668285 | 2.720974  |
| H | -2.510688 | -5.620226 | 3.246707  |
| C | -2.734327 | -4.647416 | 1.334166  |
| H | -2.749665 | -5.588358 | 0.782910  |
| C | -2.849220 | -3.439079 | 0.633568  |
| C | -2.809279 | -2.243108 | 1.383140  |
| C | -2.909916 | -0.964739 | 3.622651  |
| H | -2.581082 | -0.119036 | 3.002874  |
| C | -2.047431 | -0.954019 | 4.894100  |
| H | -2.381589 | -1.706805 | 5.624047  |
| H | -2.125185 | 0.028802  | 5.381510  |
| H | -0.991512 | -1.129693 | 4.653914  |
| C | -4.392081 | -0.757389 | 4.005221  |
| H | -5.046705 | -0.702143 | 3.125012  |
| H | -4.509806 | 0.178417  | 4.572682  |
| H | -4.748188 | -1.584827 | 4.638305  |
| C | -3.104295 | -3.464347 | -0.868935 |
| H | -2.877755 | -2.463824 | -1.263586 |
| C | -2.214988 | -4.467567 | -1.621006 |
| H | -1.153770 | -4.272215 | -1.419276 |
| H | -2.387551 | -4.377967 | -2.704038 |
| H | -2.444558 | -5.506399 | -1.340684 |
| C | -4.592708 | -3.760605 | -1.153920 |
| H | -4.865379 | -4.762297 | -0.787852 |
| H | -4.786631 | -3.730354 | -2.236820 |
| H | -5.258360 | -3.032793 | -0.669171 |
| C | 0.552996  | 1.177024  | -2.846515 |
| H | 1.117602  | 1.951284  | -2.320867 |
| C | 0.503555  | 1.247768  | -4.245960 |
| H | 1.021101  | 2.060581  | -4.765448 |
| C | -0.198184 | 0.293714  | -4.995454 |
| C | -0.832642 | -0.737291 | -4.282172 |
| H | -1.380668 | -1.509261 | -4.832269 |
| C | -0.767164 | -0.801495 | -2.886105 |
| H | -1.252443 | -1.641788 | -2.385448 |
| C | -0.077731 | 0.154672  | -2.106394 |
| C | -0.276543 | 0.370190  | -6.501317 |
| H | -0.015657 | -0.592044 | -6.967806 |

|   |           |           |           |
|---|-----------|-----------|-----------|
| H | 0.404693  | 1.136133  | -6.897302 |
| H | -1.294761 | 0.622989  | -6.838809 |
| C | 3.083895  | -0.099688 | 0.983745  |
| H | 2.691659  | -0.952704 | 1.555469  |
| H | 2.994065  | 0.810169  | 1.585463  |
| C | 4.473087  | -0.374944 | 0.434457  |
| H | 4.967284  | 0.561528  | 0.135724  |
| H | 5.109155  | -0.882815 | 1.171919  |
| C | 4.156526  | -1.246304 | -0.789443 |
| H | 3.973784  | -2.284694 | -0.476899 |
| H | 4.957645  | -1.247839 | -1.540425 |
| C | 2.872033  | -0.624923 | -1.336186 |
| H | 3.063138  | 0.125555  | -2.114725 |
| H | 2.154941  | -1.364853 | -1.706261 |

**DIJSEU<sup>44</sup>**

( $\eta^5$ -Cyclopentadienyl)-(formaldoxime-N)-dinitroso-chromium hexafluorophosphate

Charge = 1

Spin Multiplicity = 1

|    |           |           |           |
|----|-----------|-----------|-----------|
| Cr | -0.046286 | -0.003165 | -0.028455 |
| N  | -0.107447 | -2.044991 | -0.136499 |
| O  | -0.651008 | -2.627304 | -1.290722 |
| C  | 0.327700  | -2.911037 | 0.700837  |
| N  | -0.116739 | 0.131867  | 1.672484  |
| O  | -0.154483 | 0.350038  | 2.815987  |
| N  | -1.713498 | 0.294135  | -0.278328 |
| O  | -2.816011 | 0.640356  | -0.427586 |
| C  | 1.678664  | -0.210232 | -1.464143 |
| C  | 2.124835  | 0.416621  | -0.267745 |
| C  | 1.397949  | 1.647710  | -0.121646 |
| C  | 0.499175  | 1.760179  | -1.214966 |
| C  | 0.668587  | 0.601442  | -2.049844 |
| H  | 2.017920  | -1.170776 | -1.841761 |
| H  | 2.885195  | 0.039570  | 0.410241  |
| H  | 1.507926  | 2.359276  | 0.691721  |
| H  | -0.198933 | 2.574032  | -1.388206 |
| H  | 0.134765  | 0.399359  | -2.974364 |
| H  | 0.234177  | -3.979353 | 0.494887  |
| H  | 0.791659  | -2.547086 | 1.613862  |
| H  | -1.078277 | -1.885961 | -1.768254 |

**DOGKUF<sup>45</sup>**

(7,7'-Dimethyl-N,N'-ethylene-bis(salicylideneiminato))-oxo-chromium(V) trifluoromethanesulfonate

Charge = 1  
Spin Multiplicity = 2

|    |           |           |           |
|----|-----------|-----------|-----------|
| Cr | 0.051885  | -0.028438 | -0.397837 |
| O  | -0.023846 | 0.169042  | 1.155582  |
| O  | -0.330811 | 1.500153  | -1.325229 |
| O  | 1.793183  | 0.329989  | -0.897894 |
| N  | -1.811824 | -0.621763 | -0.830611 |
| N  | 0.466900  | -1.954000 | -0.736457 |
| C  | -2.760376 | 1.537773  | -1.370734 |
| C  | 2.851125  | -1.778149 | -0.363672 |
| C  | -1.481093 | 2.151636  | -1.514665 |
| C  | 2.873195  | -0.363003 | -0.531309 |
| C  | -1.374905 | 3.501291  | -1.899943 |
| C  | 4.076467  | 0.350616  | -0.364864 |
| C  | -2.516990 | 4.260497  | -2.109122 |
| C  | 5.230466  | -0.313466 | 0.024577  |
| C  | -3.788475 | 3.686556  | -1.945361 |
| C  | 5.217831  | -1.703463 | 0.239547  |
| C  | -3.901502 | 2.352625  | -1.590810 |
| C  | 4.052934  | -2.420944 | 0.027966  |
| C  | -2.876597 | 0.120015  | -1.078866 |
| C  | 1.653035  | -2.533409 | -0.668581 |
| C  | -1.948397 | -2.064908 | -0.568075 |
| C  | -0.714750 | -2.754669 | -1.110070 |
| C  | -4.227505 | -0.543356 | -1.074595 |
| C  | 1.760669  | -4.005914 | -0.957124 |
| H  | -0.378385 | 3.927371  | -2.014552 |
| H  | 4.067128  | 1.427736  | -0.531545 |
| H  | -2.421494 | 5.308688  | -2.396026 |
| H  | 6.152122  | 0.252191  | 0.168765  |
| H  | -4.686204 | 4.284928  | -2.097626 |
| H  | 6.122767  | -2.217425 | 0.562777  |
| H  | -4.899083 | 1.936039  | -1.475817 |
| H  | 4.059116  | -3.496608 | 0.196046  |
| H  | -2.838943 | -2.491045 | -1.041165 |
| H  | -2.027116 | -2.211779 | 0.521172  |
| H  | -0.653655 | -3.769758 | -0.700494 |
| H  | -0.762388 | -2.823378 | -2.208398 |
| H  | -4.370739 | -1.114935 | -0.147904 |
| H  | -4.302283 | -1.247274 | -1.917554 |
| H  | -5.046897 | 0.169354  | -1.166884 |
| H  | 1.279508  | -4.595268 | -0.161233 |
| H  | 2.799616  | -4.326341 | -1.051559 |
| H  | 1.245441  | -4.242447 | -1.898470 |

**DOGLAM<sup>45</sup>**

(5,5'-Dichloro-8,8,8',8'-tetramethyl-N,N'-ethylene-bis(salicylideneiminato))-oxo-(pyridine N-oxide)-chromium(V) trifluoromethanesulfonate

Charge = 1

Spin Multiplicity = 2

|    |           |           |           |
|----|-----------|-----------|-----------|
| Cr | -0.047773 | -0.014889 | 0.087779  |
| Cl | -5.754003 | -4.317530 | 1.036528  |
| Cl | 4.091745  | 5.225862  | -2.828142 |
| O  | -0.073855 | 0.023039  | 1.662637  |
| O  | -1.883133 | -0.076338 | -0.281210 |
| O  | 0.009146  | 1.826601  | -0.287909 |
| O  | 0.094708  | -0.136134 | -2.228727 |
| N  | 0.110286  | -2.020502 | -0.063031 |
| N  | 1.923575  | -0.208539 | -0.251574 |
| N  | -0.947322 | -0.019329 | -3.040468 |
| C  | -2.284003 | -2.399225 | 0.256508  |
| C  | 2.257617  | 2.045424  | -1.139958 |
| C  | -2.717139 | -1.058065 | 0.037901  |
| C  | 0.952391  | 2.550663  | -0.864923 |
| C  | -4.095609 | -0.765443 | 0.122890  |
| C  | 0.660318  | 3.891402  | -1.200319 |
| C  | -5.013618 | -1.757116 | 0.434538  |
| C  | 1.615762  | 4.700541  | -1.798346 |
| C  | -4.577033 | -3.075570 | 0.650956  |
| C  | 2.895584  | 4.190186  | -2.071460 |
| C  | -3.237378 | -3.401934 | 0.553835  |
| C  | 3.220940  | 2.886068  | -1.743754 |
| C  | -0.913274 | -2.802073 | 0.111652  |
| C  | 2.667715  | 0.720042  | -0.774403 |
| C  | 1.477678  | -2.616568 | -0.296912 |
| C  | 2.507404  | -1.524410 | 0.187044  |
| C  | 1.613778  | -2.903746 | -1.805167 |
| C  | 3.902672  | -1.771157 | -0.401599 |
| C  | 1.659364  | -3.931555 | 0.478414  |
| C  | 2.634349  | -1.482156 | 1.725137  |
| C  | -1.170702 | -0.993653 | -3.970775 |
| C  | -2.221809 | -0.888712 | -4.865730 |
| C  | -3.072054 | 0.219097  | -4.818495 |
| C  | -2.829584 | 1.202118  | -3.858209 |
| C  | -1.766919 | 1.069910  | -2.977358 |
| H  | -4.424838 | 0.258821  | -0.051084 |
| H  | -0.332490 | 4.282339  | -0.977166 |
| H  | -6.073816 | -1.515237 | 0.508828  |

|   |           |           |           |
|---|-----------|-----------|-----------|
| H | 1.373993  | 5.731968  | -2.054745 |
| H | -2.903841 | -4.428607 | 0.706873  |
| H | 4.219087  | 2.496716  | -1.946114 |
| H | -0.739061 | -3.883181 | 0.141860  |
| H | 3.726556  | 0.498687  | -0.942567 |
| H | 0.780159  | -3.544048 | -2.125562 |
| H | 1.592617  | -1.982348 | -2.397256 |
| H | 2.545990  | -3.447983 | -2.001786 |
| H | 4.644066  | -1.107075 | 0.062770  |
| H | 4.213337  | -2.798777 | -0.175035 |
| H | 3.937072  | -1.635786 | -1.489775 |
| H | 1.099833  | -4.749024 | 0.005150  |
| H | 2.716774  | -4.224524 | 0.456235  |
| H | 1.344843  | -3.847136 | 1.525928  |
| H | 3.205589  | -0.591231 | 2.018368  |
| H | 1.662173  | -1.450581 | 2.229646  |
| H | 3.182859  | -2.365147 | 2.075931  |
| H | -0.464592 | -1.819040 | -3.948138 |
| H | -2.363697 | -1.684102 | -5.596214 |
| H | -3.901952 | 0.314700  | -5.517398 |
| H | -3.459542 | 2.087325  | -3.780141 |
| H | -1.515074 | 1.792660  | -2.207858 |

**DOJXUV<sup>46</sup>**

Tricarbonyl-( $\eta^6$ -4,6-diethyl-bis( $\alpha$ -methyl)-3,5-divinyl-o-quinodimethane)-chromium

Charge = 0

Spin Multiplicity = 1

|    |           |          |          |
|----|-----------|----------|----------|
| Cr | 0.421766  | 3.086090 | 3.610330 |
| O  | 1.559120  | 5.785555 | 4.310987 |
| O  | -2.299053 | 3.594462 | 4.768604 |
| O  | 0.932250  | 2.310267 | 6.466230 |
| C  | 0.197120  | 3.046196 | 1.425377 |
| C  | -0.389868 | 1.833996 | 2.023596 |
| C  | 0.509153  | 0.996338 | 2.737196 |
| C  | 1.870786  | 1.460089 | 2.983461 |
| C  | 2.375627  | 2.568158 | 2.243140 |
| C  | 1.619555  | 2.932969 | 1.015962 |
| C  | 1.112010  | 4.739303 | 4.045584 |
| C  | -1.246156 | 3.415204 | 4.283128 |
| C  | 0.766080  | 2.582778 | 5.337987 |
| C  | -0.462385 | 4.260095 | 1.574950 |
| C  | 0.038228  | 5.590516 | 1.109674 |
| C  | -1.828324 | 1.451911 | 1.761205 |
| C  | -1.976367 | 0.692724 | 0.429614 |

|   |           |           |           |
|---|-----------|-----------|-----------|
| C | -0.000731 | -0.281669 | 3.308626  |
| C | 0.418519  | -1.495298 | 2.934237  |
| C | 2.755271  | 0.708080  | 3.963316  |
| C | 3.799874  | -0.180160 | 3.266210  |
| C | 3.644271  | 3.205892  | 2.601266  |
| C | 4.206837  | 4.271336  | 2.000668  |
| C | 2.034090  | 3.078406  | -0.256641 |
| C | 3.405372  | 2.870026  | -0.820956 |
| H | -1.518592 | 4.227662  | 1.848164  |
| H | 1.126961  | 5.609782  | 0.983936  |
| H | -0.420893 | 5.832432  | 0.135563  |
| H | -0.264604 | 6.385197  | 1.805218  |
| H | -2.451863 | 2.356574  | 1.730014  |
| H | -2.210910 | 0.833056  | 2.584528  |
| H | -1.630963 | 1.305778  | -0.415157 |
| H | -1.391565 | -0.238027 | 0.438045  |
| H | -3.030307 | 0.433834  | 0.254729  |
| H | -0.803388 | -0.205521 | 4.047964  |
| H | -0.016677 | -2.395974 | 3.369927  |
| H | 1.195765  | -1.633815 | 2.180364  |
| H | 2.123518  | 0.089434  | 4.612975  |
| H | 3.269922  | 1.418322  | 4.624342  |
| H | 3.323219  | -0.939119 | 2.630671  |
| H | 4.472180  | 0.414090  | 2.631181  |
| H | 4.412575  | -0.701857 | 4.015264  |
| H | 4.154301  | 2.791940  | 3.473314  |
| H | 5.143111  | 4.684631  | 2.376459  |
| H | 3.751338  | 4.767338  | 1.143552  |
| H | 1.257190  | 3.334961  | -0.985906 |
| H | 3.834094  | 3.814037  | -1.198438 |
| H | 4.103970  | 2.449032  | -0.089696 |
| H | 3.348190  | 2.190500  | -1.686546 |

### DPBPCR<sup>47</sup>

*cis*-Diphenyl-bis(2,2'-bipyridyl) chromium(III) iodide

Charge = 1

Spin Multiplicity = 4

|    |           |           |          |
|----|-----------|-----------|----------|
| Cr | -0.945954 | 1.021823  | 3.933474 |
| C  | -2.960350 | -1.297503 | 4.619140 |
| C  | 1.281789  | 1.668681  | 5.920863 |
| C  | -2.121350 | 2.405026  | 4.959703 |
| C  | -3.480537 | 2.160816  | 5.257112 |
| C  | -4.268356 | 3.066392  | 5.981076 |
| C  | -3.710270 | 4.258012  | 6.452469 |



|   |           |           |          |
|---|-----------|-----------|----------|
| C | -2.363189 | 4.528098  | 6.187382 |
| C | -1.592169 | 3.616206  | 5.456475 |
| C | -3.501778 | -2.335990 | 5.371254 |
| C | -2.914661 | -2.647725 | 6.598645 |
| C | -1.810725 | -1.913922 | 7.024081 |
| C | -1.317721 | -0.880931 | 6.216716 |
| C | -0.153950 | -0.052711 | 6.577359 |
| C | 0.526245  | -0.178899 | 7.793273 |
| C | 1.613017  | 0.647552  | 8.065973 |
| C | 1.997872  | 1.588625  | 7.110967 |
| H | -3.391368 | -1.024082 | 3.655932 |
| H | 1.545018  | 2.388513  | 5.147769 |
| H | -3.960351 | 1.236744  | 4.920538 |
| H | -5.317485 | 2.835590  | 6.181960 |
| H | -4.315949 | 4.966403  | 7.020787 |
| H | -1.911018 | 5.454357  | 6.550595 |
| H | -0.547097 | 3.870341  | 5.263000 |
| H | -4.365391 | -2.883830 | 4.996698 |
| H | -3.309241 | -3.454226 | 7.216663 |
| H | -1.337262 | -2.146500 | 7.975898 |
| H | 0.205067  | -0.915306 | 8.527173 |
| H | 2.147263  | 0.558673  | 9.011826 |
| H | 2.839337  | 2.259873  | 7.277007 |
| N | -1.896165 | -0.578401 | 5.024225 |
| N | 0.228247  | 0.870045  | 5.644535 |
| C | 0.229625  | 2.405112  | 2.907562 |
| N | 0.004139  | -0.578568 | 2.842852 |
| N | -2.120123 | 0.870189  | 2.222361 |
| C | 1.589881  | 2.162591  | 2.613660 |
| C | -0.300215 | 3.614898  | 2.408103 |
| C | 1.068223  | -1.297793 | 3.247957 |
| C | -0.574370 | -0.881108 | 1.650395 |
| C | -3.173278 | 1.669220  | 1.945695 |
| C | -1.738018 | -0.052739 | 1.289655 |
| C | 2.377960  | 3.068389  | 1.890256 |
| H | 2.070413  | 1.239846  | 2.952816 |
| C | 0.471050  | 4.526908  | 1.677600 |
| H | -1.346082 | 3.867751  | 2.598948 |
| C | 1.609557  | -2.336363 | 2.495898 |
| H | 1.499275  | -1.024396 | 4.211157 |
| C | -0.081436 | -1.914148 | 0.843049 |
| C | -3.889181 | 1.589272  | 0.755471 |
| H | -3.436295 | 2.389360  | 2.718563 |
| C | -2.418043 | -0.178828 | 0.073636 |
| C | 1.819126  | 4.258492  | 1.415915 |
| H | 3.427914  | 2.838951  | 1.692134 |

|   |           |           |           |
|---|-----------|-----------|-----------|
| H | 0.018289  | 5.451966  | 1.312067  |
| C | 1.022424  | -2.648054 | 1.268503  |
| H | 2.473106  | -2.884282 | 2.870486  |
| H | -0.554890 | -2.146672 | -0.108785 |
| C | -3.504503 | 0.647941  | -0.199342 |
| H | -4.730332 | 2.260852  | 0.589175  |
| H | -2.096924 | -0.915344 | -0.660179 |
| H | 2.425043  | 4.967017  | 0.848018  |
| H | 1.416942  | -3.454585 | 0.650477  |
| H | -4.038478 | 0.559110  | -1.145353 |

## DUNCUK<sup>48</sup>

( $\eta^6$ -Fulvenylbenzoato)-tricarbonyl-chromium

Charge = 0

Spin Multiplicity = 1

|    |          |           |           |
|----|----------|-----------|-----------|
| Cr | 6.174108 | 1.914290  | 1.885767  |
| C  | 5.198894 | 3.721835  | 2.568178  |
| C  | 5.701423 | 4.026598  | 1.288430  |
| C  | 5.098239 | 3.136426  | 0.331088  |
| C  | 4.210251 | 2.274385  | 1.005339  |
| C  | 4.273899 | 2.602344  | 2.423585  |
| C  | 4.224418 | 1.623545  | 3.428979  |
| C  | 3.364061 | -0.393550 | 4.298307  |
| C  | 2.447435 | -1.511003 | 3.991880  |
| C  | 2.287717 | -2.509389 | 4.970010  |
| C  | 1.431537 | -3.583130 | 4.736879  |
| C  | 0.728511 | -3.668897 | 3.529144  |
| C  | 0.884271 | -2.678041 | 2.553464  |
| C  | 1.740174 | -1.600675 | 2.779140  |
| C  | 6.092234 | 0.103827  | 1.570221  |
| C  | 7.261446 | 1.843920  | 3.370030  |
| C  | 7.728341 | 1.892894  | 0.896198  |
| O  | 3.441210 | 0.517216  | 3.235725  |
| O  | 3.992844 | -0.235637 | 5.326395  |
| O  | 6.021029 | -1.042828 | 1.356896  |
| O  | 7.956597 | 1.830880  | 4.309223  |
| O  | 8.719750 | 1.868441  | 0.277852  |
| H  | 5.460783 | 4.205146  | 3.504396  |
| H  | 6.427601 | 4.800589  | 1.058171  |
| H  | 5.302435 | 3.129681  | -0.735643 |
| H  | 3.620139 | 1.477599  | 0.565093  |
| H  | 4.519448 | 1.823134  | 4.458262  |
| H  | 2.840879 | -2.430361 | 5.905962  |

|   |          |           |          |
|---|----------|-----------|----------|
| H | 1.310576 | -4.355942 | 5.496868 |
| H | 0.058153 | -4.510550 | 3.348378 |
| H | 0.336314 | -2.746091 | 1.612941 |
| H | 1.859372 | -0.830516 | 2.019153 |

**FANJEJ<sup>49</sup>**

Tetracarbonyl-( $\eta^2$ -5-methoxycarbene-5-methyl-bicyclo(2.2.1)hept-2-ene)-chromium

Charge = 0

Spin Multiplicity = 1

|    |           |           |          |
|----|-----------|-----------|----------|
| Cr | -0.001226 | 4.801910  | 3.091805 |
| O  | -2.824847 | 5.358480  | 2.082902 |
| O  | 1.233626  | 6.712604  | 1.073704 |
| O  | 2.610622  | 4.595514  | 4.648376 |
| O  | -0.488455 | 7.281696  | 4.721187 |
| O  | -1.065834 | 3.213643  | 5.505038 |
| C  | -1.744943 | 5.103977  | 2.437080 |
| C  | 0.757240  | 5.961307  | 1.828987 |
| C  | 1.626262  | 4.655726  | 4.030544 |
| C  | -0.316078 | 6.280971  | 4.135527 |
| C  | -0.603305 | 3.266587  | 4.276097 |
| C  | -1.320387 | 4.421874  | 6.277930 |
| C  | -0.560603 | 1.862469  | 3.698361 |
| C  | -1.767705 | 1.872019  | 2.671458 |
| C  | -1.041774 | 2.000683  | 1.322892 |
| C  | -0.154990 | 3.261158  | 1.265345 |
| C  | 0.967654  | 3.013273  | 2.058542 |
| C  | 0.682884  | 1.678072  | 2.742978 |
| C  | 0.061610  | 0.921072  | 1.537652 |
| C  | -0.673041 | 0.722705  | 4.716327 |
| H  | -2.047289 | 5.049639  | 5.753054 |
| H  | -0.380844 | 4.960032  | 6.439007 |
| H  | -1.728654 | 4.066078  | 7.228855 |
| H  | -2.301745 | 0.912545  | 2.733144 |
| H  | -2.491739 | 2.672214  | 2.866251 |
| H  | -1.695586 | 1.887200  | 0.450024 |
| H  | -0.169880 | 3.914839  | 0.396547 |
| H  | 1.977240  | 3.347164  | 1.828777 |
| H  | 1.539178  | 1.214917  | 3.245871 |
| H  | -0.340045 | -0.075420 | 1.777182 |
| H  | 0.761575  | 0.840832  | 0.694896 |
| H  | -1.632020 | 0.750337  | 5.250443 |
| H  | -0.604073 | -0.243289 | 4.195789 |
| H  | 0.134392  | 0.769442  | 5.460867 |

**FAWBOU<sup>50</sup>**bis(( $\mu^2$ -Chloro)-( $\eta^5$ -cyclopentadienyl)-methyl-chromium(III))

Charge = 0

Spin Multiplicity = 3

|    |           |          |           |
|----|-----------|----------|-----------|
| Cr | 14.351145 | 5.857004 | 0.862175  |
| Cl | 14.721557 | 5.114113 | -1.348440 |
| C  | 12.459448 | 4.730467 | 1.236545  |
| C  | 13.521938 | 3.845990 | 1.619903  |
| C  | 14.232080 | 4.450373 | 2.678244  |
| C  | 13.618450 | 5.715078 | 2.963916  |
| C  | 12.501358 | 5.867582 | 2.092794  |
| C  | 13.817505 | 7.756897 | 0.253920  |
| H  | 11.745724 | 4.560908 | 0.434635  |
| H  | 13.768952 | 2.905036 | 1.135718  |
| H  | 15.125751 | 4.058931 | 3.156735  |
| H  | 13.945840 | 6.428388 | 3.715445  |
| H  | 11.829162 | 6.719118 | 2.057930  |
| H  | 12.840594 | 7.748416 | -0.254922 |
| H  | 13.766700 | 8.445188 | 1.112301  |
| H  | 14.583337 | 8.118753 | -0.449566 |
| Cl | 16.594374 | 6.458139 | 1.280407  |
| Cr | 16.959652 | 5.619722 | -0.897585 |
| C  | 18.889932 | 6.647256 | -1.255838 |
| C  | 17.853605 | 7.539666 | -1.685672 |
| C  | 17.148416 | 6.913365 | -2.740507 |
| C  | 17.740284 | 5.627672 | -2.972634 |
| C  | 18.831284 | 5.478947 | -2.068331 |
| C  | 17.474021 | 3.755852 | -0.182086 |
| H  | 19.588094 | 6.824413 | -0.442089 |
| H  | 17.619574 | 8.502370 | -1.239645 |
| H  | 16.273458 | 7.308722 | -3.249236 |
| H  | 17.409780 | 4.894363 | -3.703231 |
| H  | 19.479352 | 4.612231 | -1.986923 |
| H  | 18.434173 | 3.767398 | 0.357477  |
| H  | 17.536123 | 3.019596 | -0.999495 |
| H  | 16.682328 | 3.444038 | 0.518056  |

**FENFUB<sup>51</sup>**( $\eta^5$ -Pentamethylcyclopentadienyl)-tricarbonyl-trifluoromethyl-chromium

Charge = 0

Spin Multiplicity = 1

|    |           |           |          |
|----|-----------|-----------|----------|
| Cr | 2.373410  | 2.634718  | 7.065043 |
| F  | 0.552530  | 2.933127  | 9.455600 |
| F  | 1.964043  | 1.289422  | 9.732420 |
| F  | 2.630990  | 3.355229  | 9.978688 |
| O  | 1.524321  | 5.473447  | 7.643076 |
| O  | 4.885847  | 1.524987  | 8.315440 |
| O  | 4.550931  | 4.269011  | 5.794224 |
| C  | 0.404704  | 2.326262  | 6.028193 |
| C  | 0.643653  | 1.154191  | 6.817223 |
| C  | 1.872825  | 0.559129  | 6.381547 |
| C  | 2.378758  | 1.342489  | 5.283249 |
| C  | 1.469737  | 2.436834  | 5.065178 |
| C  | -0.838460 | 3.161714  | 6.067746 |
| H  | -1.622641 | 2.690754  | 5.452771 |
| H  | -0.668085 | 4.169468  | 5.668790 |
| H  | -1.230662 | 3.258064  | 7.087972 |
| C  | -0.330870 | 0.536458  | 7.769320 |
| H  | -0.991094 | -0.141968 | 7.203286 |
| H  | -0.964105 | 1.286001  | 8.256816 |
| H  | 0.167259  | -0.055222 | 8.545456 |
| C  | 2.415522  | -0.755113 | 6.853233 |
| H  | 1.914278  | -1.578433 | 6.318695 |
| H  | 2.242679  | -0.902732 | 7.926705 |
| H  | 3.492270  | -0.845448 | 6.663180 |
| C  | 3.547566  | 0.977121  | 4.419522 |
| H  | 3.222040  | 0.281482  | 3.629110 |
| H  | 4.339644  | 0.477797  | 4.992322 |
| H  | 3.985095  | 1.854315  | 3.926466 |
| C  | 1.519047  | 3.417175  | 3.932655 |
| H  | 0.935842  | 3.030179  | 3.081308 |
| H  | 2.543731  | 3.587417  | 3.579139 |
| H  | 1.089724  | 4.387711  | 4.212853 |
| C  | 1.854926  | 2.550831  | 9.158074 |
| C  | 1.846332  | 4.372856  | 7.453318 |
| C  | 3.905352  | 1.959177  | 7.866859 |
| C  | 3.704412  | 3.634492  | 6.286093 |

**FEWMEA**<sup>52</sup>

(Pentane-2,4-bis(2,6-dimethylphenyliminato))-(diethyl ether-O)-(trimethylsilylmethyl)-chromium(III) tetrakis(3,5-bis(trifluoromethylphenyl))borate

Charge = 0

Spin Multiplicity = 2

|    |           |           |           |
|----|-----------|-----------|-----------|
| Cr | 0.391642  | 15.166412 | 13.050285 |
| Si | -0.475323 | 17.853073 | 10.910268 |
| N  | 2.296197  | 14.814479 | 12.872941 |
| N  | 0.016654  | 13.264743 | 13.090302 |
| O  | -0.936299 | 16.126599 | 14.403841 |
| C  | 4.449451  | 13.606790 | 12.763751 |
| H  | 4.846101  | 13.977804 | 13.721010 |
| H  | 4.867257  | 14.248441 | 11.976597 |
| H  | 4.810983  | 12.583819 | 12.614886 |
| C  | 2.942933  | 13.637250 | 12.776249 |
| C  | 2.251470  | 12.420264 | 12.730774 |
| H  | 2.850668  | 11.520580 | 12.609873 |
| C  | 0.871442  | 12.239634 | 12.876613 |
| C  | 0.332997  | 10.832517 | 12.819831 |
| H  | -0.250410 | 10.590050 | 13.719297 |
| H  | 1.153257  | 10.113318 | 12.724773 |
| H  | -0.341393 | 10.708148 | 11.959822 |
| C  | 3.038130  | 16.048179 | 12.899005 |
| C  | 3.362869  | 16.637308 | 14.145195 |
| C  | 4.021606  | 17.875432 | 14.143845 |
| H  | 4.267190  | 18.344684 | 15.098532 |
| C  | 4.380145  | 18.497066 | 12.948859 |
| H  | 4.891315  | 19.460674 | 12.966703 |
| C  | 4.099712  | 17.877891 | 11.729019 |
| H  | 4.406136  | 18.352838 | 10.795103 |
| C  | 3.430415  | 16.649537 | 11.676394 |
| C  | 3.103947  | 15.933651 | 15.453183 |
| H  | 3.014229  | 16.654042 | 16.276100 |
| H  | 3.941820  | 15.261791 | 15.700821 |
| H  | 2.203070  | 15.305626 | 15.431905 |
| C  | 3.202656  | 15.967518 | 10.353072 |
| H  | 2.170482  | 15.613374 | 10.239443 |
| H  | 3.852357  | 15.085096 | 10.242220 |
| H  | 3.434734  | 16.647219 | 9.524176  |
| C  | -1.380888 | 12.979459 | 13.308964 |
| C  | -2.273146 | 12.864079 | 12.218491 |
| C  | -3.631976 | 12.645014 | 12.497184 |
| H  | -4.333461 | 12.563551 | 11.664205 |
| C  | -4.089827 | 12.512730 | 13.805716 |
| H  | -5.149742 | 12.340997 | 13.999371 |
| C  | -3.186761 | 12.581225 | 14.869547 |
| H  | -3.539813 | 12.449053 | 15.894107 |
| C  | -1.825640 | 12.812761 | 14.645434 |
| C  | -1.821183 | 12.903110 | 10.780302 |
| H  | -2.418089 | 13.620093 | 10.198599 |

|   |           |           |           |
|---|-----------|-----------|-----------|
| H | -1.968616 | 11.916420 | 10.313828 |
| H | -0.765231 | 13.172028 | 10.676356 |
| C | -0.861269 | 12.840928 | 15.801763 |
| H | -1.396708 | 12.724841 | 16.752218 |
| H | -0.296628 | 13.783296 | 15.840352 |
| H | -0.118861 | 12.031200 | 15.730785 |
| C | -0.408702 | 16.000660 | 11.382618 |
| H | 0.038841  | 15.443699 | 10.541393 |
| H | -1.458788 | 15.659489 | 11.449479 |
| C | -2.288747 | 18.341366 | 10.651026 |
| H | -2.353868 | 19.391460 | 10.325835 |
| H | -2.889083 | 18.239889 | 11.567053 |
| H | -2.755463 | 17.718180 | 9.873216  |
| C | 0.279362  | 19.027826 | 12.188029 |
| H | 0.307580  | 20.045717 | 11.768544 |
| H | 1.310916  | 18.748976 | 12.449726 |
| H | -0.312719 | 19.075487 | 13.112883 |
| C | 0.417057  | 18.119791 | 9.263550  |
| H | 0.239392  | 19.147863 | 8.911275  |
| H | 0.045713  | 17.428994 | 8.491894  |
| H | 1.502902  | 17.980489 | 9.351435  |
| C | -3.264116 | 16.386548 | 15.318970 |
| H | -4.301543 | 16.463247 | 14.961306 |
| H | -3.074590 | 17.258317 | 15.958264 |
| H | -3.176772 | 15.468664 | 15.913886 |
| C | -2.364202 | 16.350957 | 14.100143 |
| H | -2.633052 | 15.514088 | 13.445158 |
| H | -2.432892 | 17.288692 | 13.529767 |
| C | -0.343667 | 17.164186 | 15.274224 |
| H | 0.657286  | 17.365216 | 14.864869 |
| H | -0.937703 | 18.080235 | 15.150490 |
| C | -0.257561 | 16.737842 | 16.726789 |
| H | 0.246200  | 17.536242 | 17.291909 |
| H | 0.333033  | 15.819983 | 16.844328 |
| H | -1.246192 | 16.577472 | 17.171318 |

### FIHPUI<sup>53</sup>

tris(bis(1-Phenylethyl)amido)-chromium(III)

Charge = 0

Spin Multiplicity = 4

|   |                  |                   |                  |
|---|------------------|-------------------|------------------|
| C | 7.13668386669397 | 10.02339714574990 | 8.75057214129595 |
| H | 7.63182967738823 | 9.37779013222879  | 9.50348237146787 |
| C | 8.22067879254011 | 10.87121305131870 | 8.08430900124300 |

|   |                   |                   |                   |
|---|-------------------|-------------------|-------------------|
| H | 7.79607728330983  | 11.50511996804940 | 7.29186027422380  |
| H | 8.97554447654395  | 10.22139526724683 | 7.61920031821774  |
| H | 8.72253812569064  | 11.52290067063880 | 8.81080307476285  |
| C | 6.54286561549157  | 9.06420966869229  | 7.71121091793554  |
| C | 6.77620096460498  | 7.68463210558864  | 7.80631350197726  |
| H | 7.34010752621697  | 7.29854735127438  | 8.65888421534184  |
| C | 6.30149513812593  | 6.80089700212611  | 6.83069236186273  |
| H | 6.49525270205804  | 5.73072373737266  | 6.92681467387099  |
| C | 5.57937571097717  | 7.28760514883275  | 5.73733502731219  |
| H | 5.20546399733888  | 6.60219107603155  | 4.97470144401508  |
| C | 5.34261913319979  | 8.66273319692437  | 5.62719202311886  |
| H | 4.78530450321112  | 9.05435577563480  | 4.77413745985829  |
| C | 5.82416470372576  | 9.53813075217654  | 6.60364513226593  |
| H | 5.64385800837087  | 10.60909028741696 | 6.49912609530216  |
| C | 7.65732083896126  | 13.51080264839448 | 11.77642607798853 |
| H | 6.91199818382848  | 12.73120682964542 | 12.01786736527008 |
| C | 7.27657972027727  | 14.74756536156577 | 12.60557510623715 |
| H | 7.95962636472091  | 15.59308631430701 | 12.44239948242058 |
| H | 7.28345327571477  | 14.51096512688985 | 13.67979734926729 |
| H | 6.26648786781647  | 15.08130704413714 | 12.33587198581348 |
| C | 9.02347386955070  | 12.92538773609514 | 12.16540786907471 |
| C | 9.95582601342566  | 13.62086104305248 | 12.95010241853391 |
| H | 9.72407498521923  | 14.61818166188215 | 13.32531798839062 |
| C | 11.19621208231046 | 13.05339281799395 | 13.26981947749530 |
| H | 11.90647319627101 | 13.61731114530820 | 13.87762242712001 |
| C | 11.52195876481275 | 11.77269291732105 | 12.81875748763461 |
| H | 12.48618928875662 | 11.32797402793247 | 13.07100360133569 |
| C | 10.59706545821673 | 11.06360120211047 | 12.04311187104832 |
| H | 10.83587244564744 | 10.05897989112829 | 11.68923266016288 |
| C | 9.36730734514298  | 11.63818197264945 | 11.72052129909152 |
| H | 8.65518921348035  | 11.08466325724511 | 11.10714765170808 |
| C | 8.53834523049115  | 14.70112691059529 | 9.78206592076116  |
| H | 9.24679553741508  | 14.89235616379613 | 10.60535637962550 |
| C | 7.91026623086767  | 16.05445455267694 | 9.41807830637080  |
| H | 7.15873008952246  | 15.94940022873243 | 8.62521797918864  |
| H | 8.68697082056712  | 16.75323829777886 | 9.07223917919662  |
| H | 7.41140572826010  | 16.49347815401985 | 10.29116991517389 |
| C | 9.39808173283897  | 14.16427219081649 | 8.63775697556515  |
| C | 10.67613714783793 | 13.65096523403618 | 8.90973788847753  |
| H | 11.02691614831283 | 13.61363193249825 | 9.94339225108602  |
| C | 11.50319851240759 | 13.18698889899013 | 7.88290033880739  |
| H | 12.49473682305091 | 12.79642234595457 | 8.11995023857238  |
| C | 11.06645866904779 | 13.23107279645045 | 6.55518178456262  |
| H | 11.71156136350186 | 12.87406590671613 | 5.75045205551292  |
| C | 9.79869811324075  | 13.74509339982159 | 6.26757502779500  |
| H | 9.44868337014275  | 13.79143211070063 | 5.23451029211495  |



|    |                   |                   |                   |
|----|-------------------|-------------------|-------------------|
| C  | 8.97817551339835  | 14.20900494924903 | 7.30005770839995  |
| H  | 7.99787431882163  | 14.61848192973867 | 7.05226859676532  |
| N  | 6.13996479785556  | 10.86154899331612 | 9.45604617039638  |
| N  | 7.53748303155930  | 13.72433542416703 | 10.30571352835628 |
| Cr | 6.14207757870220  | 12.77819038190909 | 9.45239431199399  |
| C  | 5.14090970546516  | 10.02803328979148 | 10.16341534099668 |
| H  | 4.64481018779632  | 9.38122034406241  | 9.41217330366232  |
| C  | 4.05811036283156  | 10.88042168422467 | 10.82598045149730 |
| H  | 4.48334203905110  | 11.51603011996970 | 11.61673283019241 |
| H  | 3.30140225425016  | 10.23372439795128 | 11.29242215908457 |
| H  | 3.55831946388333  | 11.53054503936666 | 10.09665273771892 |
| C  | 5.73087469734804  | 9.07072031094884  | 11.20678854876982 |
| C  | 5.48754110202226  | 7.69230096683289  | 11.11999145647778 |
| H  | 4.91920060007303  | 7.30526459366105  | 10.27078836639494 |
| C  | 5.95770063537489  | 6.81085098212796  | 12.09986450750828 |
| H  | 5.75609421708358  | 5.74155222735949  | 12.01033329496306 |
| C  | 6.68534825706362  | 7.29864904616477  | 13.18907785486997 |
| H  | 7.05583443416304  | 6.61494108161828  | 13.95491071430105 |
| C  | 6.93207412951175  | 8.67264840385370  | 13.29090731957794 |
| H  | 7.49388408923257  | 9.06519579187917  | 14.14058040636759 |
| C  | 6.45489513213121  | 9.54584678081572  | 12.31034743273854 |
| H  | 6.64294139946808  | 10.61603948015200 | 12.40827313969629 |
| C  | 4.63015590037555  | 13.50920881202584 | 7.12572366687524  |
| H  | 5.37448126489569  | 12.72800230578271 | 6.88650114872586  |
| C  | 5.01294781456044  | 14.74334112182762 | 6.29357201864210  |
| H  | 4.33111303842965  | 15.59026901120919 | 6.45435772173151  |
| H  | 5.00621589938770  | 14.50404250556274 | 5.21995656674526  |
| H  | 6.02338333932423  | 15.07646582690174 | 6.56275798734689  |
| C  | 3.26323563919874  | 12.92494004409591 | 6.73753734392170  |
| C  | 2.33213656352959  | 13.62025382980453 | 5.95119618260995  |
| H  | 2.56546018984104  | 14.61645258714121 | 5.57400539335585  |
| C  | 1.09095999832731  | 13.05407512760988 | 5.63228504818332  |
| H  | 0.38176390752747  | 13.61789819181633 | 5.02315124920798  |
| C  | 0.76312602966302  | 11.77477111173123 | 6.08573651115525  |
| H  | -0.20171903671822 | 11.33103724110515 | 5.83410358966763  |
| C  | 1.68670927364005  | 11.06576089177423 | 6.86301332888741  |
| H  | 1.44624610541663  | 10.06220398121170 | 7.21878992079601  |
| C  | 2.91728334882587  | 11.63909652948396 | 7.18491822326351  |
| H  | 3.62841850106861  | 11.08567397892165 | 7.79954527008989  |
| C  | 3.75025735260750  | 14.70637212129577 | 9.11634977154200  |
| H  | 3.04221879788626  | 14.89594473690013 | 8.29231723994978  |
| C  | 4.38002302290353  | 16.06001229281084 | 9.47629467657138  |
| H  | 5.13020313205795  | 15.95672544983700 | 10.27062480636632 |
| H  | 3.60385819096034  | 16.76110408195197 | 9.81868064960548  |
| H  | 4.88051151642572  | 16.49537990278744 | 8.60229595596699  |
| C  | 2.88963524623958  | 14.17434129913320 | 10.26219882390206 |

|   |                   |                   |                   |
|---|-------------------|-------------------|-------------------|
| C | 1.61108166113775  | 13.66159963945469 | 9.99150513352085  |
| H | 1.26062856794722  | 13.62106131899321 | 8.95784459018785  |
| C | 0.78309625872372  | 13.20216697047058 | 11.01964627159951 |
| H | -0.20880622580035 | 12.81190078230881 | 10.78361627356256 |
| C | 1.21942894036463  | 13.25040755858628 | 12.34735258073689 |
| H | 0.57360282665001  | 12.89701759997368 | 13.15310269106160 |
| C | 2.48771201781237  | 13.76392507123400 | 12.63361354175726 |
| H | 2.83734030920350  | 13.81342604400171 | 13.66667203739040 |
| C | 3.30922538282455  | 14.22331141863233 | 11.59986573729511 |
| H | 4.28971018507770  | 14.63305359407995 | 11.84655606296264 |
| N | 4.74956143545191  | 13.72619034183686 | 8.59602811861103  |

### FIRFIW<sup>54</sup>

(3-(1*R*,2*R*,3*R*,5*S*-(-)-Isopinocampanyl-amino)-3-phenylpropa-1,2-dienylidene)-pentacarbonyl-chromium

Charge = 0

Spin Multiplicity = 1

|    |           |          |           |
|----|-----------|----------|-----------|
| Cr | 8.810034  | 4.469566 | 7.924738  |
| N  | 3.601775  | 5.783996 | 9.036602  |
| H  | 2.656493  | 6.150231 | 8.926782  |
| O  | 8.164426  | 2.922960 | 5.372961  |
| C  | 8.416311  | 3.507101 | 6.341909  |
| C  | 9.204841  | 5.996874 | 6.875492  |
| O  | 9.446644  | 6.929005 | 6.230106  |
| C  | 9.094761  | 5.464100 | 9.511605  |
| O  | 9.264697  | 6.072159 | 10.483871 |
| O  | 8.065229  | 2.037289 | 9.612390  |
| C  | 8.348846  | 2.960619 | 8.971816  |
| C  | 10.608558 | 3.931101 | 7.876934  |
| O  | 11.723705 | 3.597176 | 7.847244  |
| C  | 6.902298  | 5.022665 | 7.968369  |
| C  | 5.700345  | 5.355530 | 8.001369  |
| C  | 4.365148  | 5.726376 | 7.938622  |
| C  | 3.735923  | 6.066282 | 6.639938  |
| C  | 4.543595  | 6.506790 | 5.575777  |
| H  | 5.620167  | 6.587648 | 5.727120  |
| C  | 3.973339  | 6.846785 | 4.350424  |
| H  | 4.609921  | 7.196795 | 3.536924  |
| C  | 2.590965  | 6.737294 | 4.163935  |
| H  | 2.145972  | 6.996973 | 3.202350  |
| C  | 1.780977  | 6.283032 | 5.210163  |
| H  | 0.705468  | 6.175607 | 5.064307  |
| C  | 2.346363  | 5.950871 | 6.440783  |

|   |          |          |           |
|---|----------|----------|-----------|
| H | 1.698615 | 5.561069 | 7.227952  |
| C | 4.015868 | 5.443586 | 10.402041 |
| H | 4.993379 | 4.963254 | 10.271944 |
| C | 4.209575 | 6.735384 | 11.261300 |
| H | 5.275997 | 7.006380 | 11.245580 |
| H | 3.669393 | 7.572773 | 10.791770 |
| C | 3.696784 | 6.575091 | 12.697699 |
| H | 3.943422 | 7.462565 | 13.299935 |
| C | 4.049652 | 5.168649 | 13.305418 |
| C | 2.783910 | 4.665413 | 12.505749 |
| H | 2.210986 | 3.838549 | 12.953172 |
| C | 3.029242 | 4.392245 | 11.009291 |
| H | 2.049890 | 4.539830 | 10.518842 |
| C | 2.216886 | 6.108535 | 12.632120 |
| H | 1.662742 | 6.282551 | 13.560884 |
| H | 1.617077 | 6.478103 | 11.786407 |
| C | 5.440351 | 4.573580 | 13.071501 |
| H | 5.768235 | 4.579922 | 12.026002 |
| H | 5.478976 | 3.531343 | 13.424318 |
| H | 6.188009 | 5.139967 | 13.649179 |
| C | 3.784061 | 5.126524 | 14.820032 |
| H | 2.804865 | 5.536007 | 15.099668 |
| H | 4.554747 | 5.701090 | 15.357352 |
| H | 3.828999 | 4.088096 | 15.184061 |
| C | 3.478548 | 2.959044 | 10.698184 |
| H | 3.609216 | 2.809820 | 9.615847  |
| H | 2.725322 | 2.237390 | 11.046638 |
| H | 4.431303 | 2.717115 | 11.189287 |

### FIVHOH<sup>55</sup>

( $\eta^6$ -1,2,3,4,5,6-Benzocyclo-octatetraene)-tricarbonyl-chromium(0)

Charge = 0

Spin Multiplicity = 1

|    |          |          |           |
|----|----------|----------|-----------|
| Cr | 6.932992 | 3.369850 | 2.103707  |
| O  | 9.136603 | 4.408388 | 0.335330  |
| O  | 8.089647 | 0.586600 | 2.072147  |
| O  | 5.735151 | 3.008319 | -0.633493 |
| C  | 8.299622 | 4.031241 | 1.059826  |
| C  | 7.644653 | 1.664349 | 2.073077  |
| C  | 6.156854 | 3.148937 | 0.448204  |
| C  | 7.960495 | 3.358963 | 4.227948  |
| C  | 7.789380 | 4.642607 | 3.692493  |
| C  | 6.600903 | 5.295928 | 3.235208  |

|   |          |          |          |
|---|----------|----------|----------|
| C | 5.341333 | 4.775843 | 2.872941 |
| C | 4.853577 | 3.430636 | 2.847979 |
| C | 5.354070 | 2.282567 | 3.476677 |
| C | 5.849290 | 2.173922 | 4.873123 |
| C | 5.065826 | 1.511220 | 5.831776 |
| C | 5.521862 | 1.375408 | 7.145640 |
| C | 6.771630 | 1.889572 | 7.505399 |
| C | 7.558464 | 2.537263 | 6.549271 |
| C | 7.095687 | 2.687452 | 5.231995 |
| H | 9.010427 | 3.058045 | 4.285857 |
| H | 8.699983 | 5.204571 | 3.472339 |
| H | 6.756389 | 6.327151 | 2.911847 |
| H | 4.718127 | 5.485235 | 2.324583 |
| H | 4.042014 | 3.281313 | 2.132678 |
| H | 4.901924 | 1.359888 | 3.101527 |
| H | 4.102017 | 1.088439 | 5.540995 |
| H | 4.910205 | 0.851304 | 7.881610 |
| H | 7.142797 | 1.770075 | 8.523924 |
| H | 8.545422 | 2.918134 | 6.820219 |

### FIVZOZ<sup>56</sup>

*trans*-bis(Acetylacetonato-O,O')-chloromethyl-pyridine-chromium(III)

Charge = 0

Spin Multiplicity = 4

|    |           |           |          |
|----|-----------|-----------|----------|
| Cr | 2.156735  | -0.000073 | 3.817116 |
| Cl | 3.753036  | 0.001821  | 0.896596 |
| N  | 0.311148  | -0.000052 | 5.063745 |
| C  | 3.933793  | -0.000325 | 2.732789 |
| C  | -0.909416 | -0.000900 | 4.490766 |
| C  | -2.088613 | -0.000702 | 5.233280 |
| C  | -2.007358 | 0.000480  | 6.627227 |
| C  | -0.745376 | 0.001348  | 7.224967 |
| C  | 0.384915  | 0.001008  | 6.410037 |
| O  | 2.907179  | 1.368439  | 5.031872 |
| O  | 1.328932  | 1.381425  | 2.683910 |
| C  | 3.594801  | 3.456977  | 5.907409 |
| C  | 2.873216  | 2.645752  | 4.860667 |
| C  | 2.223602  | 3.297633  | 3.797909 |
| C  | 1.484673  | 2.654798  | 2.786420 |
| C  | 0.800981  | 3.476542  | 1.723267 |
| H  | -0.923541 | -0.001830 | 3.400201 |
| H  | -3.050759 | -0.001437 | 4.721280 |
| H  | -2.911662 | 0.000772  | 7.237122 |

|   |           |           |          |
|---|-----------|-----------|----------|
| H | -0.631327 | 0.002214  | 8.308888 |
| H | 1.390815  | 0.001716  | 6.831419 |
| H | 2.274900  | 4.384713  | 3.768433 |
| H | 4.533889  | 0.894118  | 2.949334 |
| O | 2.907014  | -1.368665 | 5.031864 |
| O | 1.329173  | -1.381475 | 2.683599 |
| H | 4.532417  | -0.896233 | 2.947377 |
| C | 2.873057  | -2.645964 | 4.860580 |
| C | 1.485103  | -2.654848 | 2.785930 |
| C | 3.593870  | -3.457293 | 5.907771 |
| C | 2.223863  | -3.297746 | 3.797499 |
| C | 0.801957  | -3.476509 | 1.722361 |
| H | 2.275257  | -4.384819 | 3.767884 |
| H | 3.517460  | 4.534333  | 5.721907 |
| H | 4.656732  | 3.168722  | 5.926953 |
| H | 3.180436  | 3.229376  | 6.900987 |
| H | -0.274007 | 3.242854  | 1.709958 |
| H | 1.203469  | 3.200990  | 0.736722 |
| H | 0.936157  | 4.552728  | 1.880174 |
| H | 3.519318  | -4.534514 | 5.720358 |
| H | 3.176294  | -3.232305 | 6.900623 |
| H | 4.655065  | -3.166663 | 5.930648 |
| H | -0.272699 | -3.241465 | 1.707172 |
| H | 0.935609  | -4.552751 | 1.880204 |
| H | 1.206355  | -3.202203 | 0.736235 |

### FOBPOB<sup>57</sup>

Pentacarbonyl-(dichloro-(2,6-di-*t*-butyl-4-methylphenoxy)phosphine-P)-chromium

Charge = 0

Spin Multiplicity = 1

|    |           |          |           |
|----|-----------|----------|-----------|
| Cr | 1.649721  | 3.451051 | 2.050173  |
| P  | 3.050131  | 5.028266 | 3.001923  |
| Cl | 4.759395  | 4.279101 | 3.957582  |
| Cl | 4.078283  | 6.271687 | 1.663926  |
| O  | -0.172393 | 1.379260 | 0.794047  |
| O  | 0.907743  | 5.279845 | -0.279773 |
| O  | 3.992284  | 2.374630 | 0.411333  |
| O  | -0.745032 | 4.467944 | 3.649341  |
| O  | 2.231786  | 1.385103 | 4.221520  |
| O  | 2.356063  | 6.025632 | 4.073478  |
| C  | 0.526305  | 2.169068 | 1.271749  |
| C  | 1.204025  | 4.615406 | 0.618203  |
| C  | 3.117245  | 2.792969 | 1.039885  |

|   |          |           |          |
|---|----------|-----------|----------|
| C | 0.174325 | 4.099878  | 3.054038 |
| C | 2.030457 | 2.190739  | 3.417707 |
| C | 2.982790 | 7.083682  | 4.800344 |
| C | 3.538088 | 6.797274  | 6.071692 |
| C | 4.388490 | 7.781833  | 6.599836 |
| C | 4.621914 | 9.006114  | 5.971095 |
| C | 3.860678 | 9.303871  | 4.839840 |
| C | 2.988602 | 8.383052  | 4.236808 |
| C | 3.164290 | 5.632664  | 7.034708 |
| C | 2.456241 | 6.295786  | 8.249931 |
| C | 4.424634 | 4.897199  | 7.542157 |
| C | 2.178639 | 4.582201  | 6.491262 |
| C | 5.614015 | 9.995128  | 6.529314 |
| C | 2.011920 | 8.966996  | 3.174734 |
| C | 1.005024 | 7.982481  | 2.552532 |
| C | 2.779982 | 9.663389  | 2.029294 |
| C | 1.161799 | 10.034976 | 3.918990 |
| H | 4.870205 | 7.595080  | 7.560735 |
| H | 3.929067 | 10.309069 | 4.421407 |
| H | 2.164355 | 5.518308  | 8.972087 |
| H | 1.546976 | 6.826886  | 7.931969 |
| H | 3.107588 | 7.012688  | 8.766880 |
| H | 4.956520 | 4.401907  | 6.719222 |
| H | 4.129777 | 4.125988  | 8.269624 |
| H | 5.126988 | 5.575879  | 8.044652 |
| H | 2.617848 | 3.963591  | 5.701023 |
| H | 1.254170 | 5.037561  | 6.114358 |
| H | 1.908152 | 3.907254  | 7.316751 |
| H | 5.331848 | 11.028394 | 6.284690 |
| H | 6.617165 | 9.820308  | 6.107897 |
| H | 5.698814 | 9.906374  | 7.621265 |
| H | 1.485845 | 7.248480  | 1.896578 |
| H | 0.302314 | 8.558125  | 1.932065 |
| H | 0.421114 | 7.450727  | 3.314265 |
| H | 3.437478 | 10.462672 | 2.396997 |
| H | 2.061262 | 10.118944 | 1.331541 |
| H | 3.393096 | 8.947779  | 1.465994 |
| H | 1.782342 | 10.836859 | 4.340112 |
| H | 0.589232 | 9.578220  | 4.739654 |
| H | 0.448797 | 10.489824 | 3.214757 |

### FOMBIT<sup>58</sup>

*trans*-bis(2-Methylquinolin-8-olato)-nitrido-chromium(V)

Charge = 0

Spin Multiplicity = 2

|    |                   |                   |                   |
|----|-------------------|-------------------|-------------------|
| Cr | -0.80224159148642 | 1.57754126184690  | 3.22561194120176  |
| C  | 1.31379332517237  | 2.60708028823946  | 1.59460581625140  |
| C  | 1.66834169589523  | 2.81662737114895  | 2.95871715837201  |
| C  | 2.86879368958824  | 3.46670190741141  | 3.23926026212362  |
| C  | 3.70115140370800  | 3.90338703006620  | 2.18215292349865  |
| C  | 3.37005902693913  | 3.69808783570899  | 0.85293462750541  |
| C  | 2.15827683500720  | 3.03119730380292  | 0.53179805873298  |
| C  | 1.70896437725813  | 2.73273773952446  | -0.77804032748402 |
| C  | 0.52354282528463  | 2.05091116811297  | -0.95768883086312 |
| C  | -0.27141388021996 | 1.65378526165331  | 0.14902376375874  |
| C  | -1.53444556375372 | 0.87539912263805  | -0.05393919089396 |
| N  | -0.80223409821136 | 0.03234626413857  | 3.22561858902702  |
| N  | 0.12264660926158  | 1.95493245505775  | 1.39523540338428  |
| O  | 0.81818392893771  | 2.37074764836064  | 3.88889072614411  |
| H  | -1.43597999285793 | -0.12495491077215 | 0.39522393751661  |
| H  | -1.75100408622737 | 0.76304032586329  | -1.12238896336973 |
| H  | -2.37916575438579 | 1.36863046481729  | 0.44494384712729  |
| H  | 3.15886610655151  | 3.63317023854581  | 4.27748212844523  |
| H  | 4.63427405617387  | 4.41198225712783  | 2.43069325198897  |
| H  | 4.02734345168266  | 4.03447227057027  | 0.05029908970975  |
| H  | 2.30900382463279  | 3.03455569710417  | -1.63874233131449 |
| H  | 0.17481940729662  | 1.80108535566523  | -1.95948926814334 |
| C  | -2.91828205076786 | 2.60708716925329  | 4.85659758621997  |
| C  | -3.27281862447256 | 2.81659320590828  | 3.49247212257504  |
| C  | -4.47328539544817 | 3.46664282893008  | 3.21191024849003  |
| C  | -5.30564884264704 | 3.90335270443974  | 4.26900164594119  |
| C  | -4.97456387164018 | 3.69809232418332  | 5.59822884647102  |
| C  | -3.76278364915584 | 3.03120966882677  | 5.91938915783122  |
| C  | -3.31349904927502 | 2.73274855134432  | 7.22923672046142  |
| C  | -2.12809678300630 | 2.05089429443200  | 7.40890912433285  |
| C  | -1.33312078767057 | 1.65376194848408  | 6.30221371131924  |
| C  | -0.07011954930733 | 0.87532860575654  | 6.50520880043057  |
| N  | -1.72713807430883 | 1.95493934929359  | 5.05599163855822  |
| O  | -2.42265490151518 | 2.37072202988124  | 2.56231309484946  |
| H  | -0.16860965187100 | -0.12501901870750 | 6.05603872735230  |
| H  | 0.14639962448778  | 0.76295543843048  | 7.57366445403611  |
| H  | 0.77464855595741  | 1.36851343180490  | 6.00636097492098  |
| H  | -4.76335598298444 | 3.63308062225405  | 2.17368298357850  |
| H  | -6.23877288536693 | 4.41193710180606  | 4.02044307359299  |
| H  | -5.63185782370932 | 4.03448909851490  | 6.40085139675667  |
| H  | -3.91355176986210 | 3.03457432024817  | 8.08992704950754  |
| H  | -1.77940408368365 | 1.80105196828337  | 8.41071603005548  |

FOSVEO<sup>59</sup>

(*t*-Butyl-tris(dimethylphosphinomethyl)silane-P,P',P'')-trimethyl-chromium(III)

Charge = 0

Spin Multiplicity = 4

|    |           |           |           |
|----|-----------|-----------|-----------|
| Cr | 18.281524 | 3.288890  | 14.591521 |
| P  | 20.595494 | 3.286761  | 15.939035 |
| P  | 17.415923 | 1.584745  | 16.526719 |
| Si | 19.825686 | 3.287693  | 18.090100 |
| C  | 16.424927 | 3.291305  | 13.618291 |
| C  | 18.916986 | 1.722888  | 13.359285 |
| C  | 21.771900 | 1.862048  | 15.733538 |
| C  | 18.078343 | -0.112509 | 16.810722 |
| C  | 15.620943 | 1.313651  | 16.877921 |
| C  | 18.123630 | 2.606385  | 17.825214 |
| C  | 20.792961 | 3.288140  | 19.746886 |
| C  | 19.784631 | 3.293154  | 20.908872 |
| C  | 21.672392 | 2.023498  | 19.813779 |
| H  | 15.826190 | 4.187925  | 13.858385 |
| H  | 16.604540 | 3.283862  | 12.529735 |
| H  | 19.839284 | 1.223715  | 13.705173 |
| H  | 19.093249 | 2.094484  | 12.335417 |
| H  | 18.117810 | 0.962353  | 13.310583 |
| H  | 22.111953 | 1.846109  | 14.688177 |
| H  | 21.259001 | 0.914700  | 15.940700 |
| H  | 22.647512 | 1.952772  | 16.389615 |
| H  | 17.732067 | -0.766726 | 15.998761 |
| H  | 17.741180 | -0.520405 | 17.773444 |
| H  | 19.174773 | -0.087190 | 16.787828 |
| H  | 15.223047 | 0.636962  | 16.108706 |
| H  | 15.067791 | 2.257366  | 16.820040 |
| H  | 15.476156 | 0.860526  | 17.867917 |
| H  | 19.140665 | 4.184281  | 20.887961 |
| H  | 20.333151 | 3.293859  | 21.866763 |
| H  | 22.405043 | 1.985748  | 18.993927 |
| H  | 21.070621 | 1.103373  | 19.778382 |
| H  | 22.237779 | 2.018018  | 20.761512 |
| P  | 17.418586 | 4.991058  | 16.521744 |
| C  | 18.922744 | 4.851942  | 13.359207 |
| C  | 21.771279 | 4.712278  | 15.735690 |
| H  | 15.819622 | 2.402088  | 13.869435 |
| C  | 18.125064 | 3.972752  | 17.823685 |
| C  | 21.679322 | 4.548239  | 19.808921 |
| H  | 19.136235 | 2.405166  | 20.891801 |
| C  | 18.081384 | 6.688809  | 16.801144 |



|   |           |          |           |
|---|-----------|----------|-----------|
| C | 15.623516 | 5.263728 | 16.870613 |
| H | 19.837152 | 5.358511 | 13.715023 |
| H | 19.114953 | 4.475818 | 12.339867 |
| H | 18.119530 | 5.607089 | 13.295840 |
| H | 22.111323 | 4.730148 | 14.690342 |
| H | 21.258164 | 5.659153 | 15.944535 |
| H | 22.646933 | 4.620738 | 16.391569 |
| H | 22.413054 | 4.578110 | 18.989693 |
| H | 21.082695 | 5.471511 | 19.768774 |
| H | 22.243751 | 4.554818 | 20.757229 |
| H | 17.734982 | 7.340890 | 15.987505 |
| H | 17.744471 | 7.099486 | 17.762774 |
| H | 19.177821 | 6.663343 | 16.778013 |
| H | 15.226010 | 5.936189 | 16.097497 |
| H | 15.070593 | 4.319615 | 16.817586 |
| H | 15.478042 | 5.722069 | 17.858103 |

### GABQUV<sup>60</sup>

bis(bis(Cyclohexyl)amino)-dioxo-chromium(VI)

Charge = 0

Spin Multiplicity = 1

|    |           |           |           |
|----|-----------|-----------|-----------|
| Cr | 0.015483  | -0.055452 | -0.292288 |
| O  | 0.068806  | -0.281585 | 1.305270  |
| O  | -0.026075 | -1.403605 | -1.139180 |
| N  | -1.506777 | 0.894300  | -0.678413 |
| N  | 1.522504  | 0.898522  | -0.724770 |
| C  | -2.757949 | 2.125767  | 1.128588  |
| C  | -2.844995 | 3.463049  | 1.881535  |
| C  | -3.080556 | 4.637306  | 0.922594  |
| C  | -2.000281 | 4.687662  | -0.165951 |
| C  | -1.902327 | 3.357842  | -0.930338 |
| C  | -1.672071 | 2.175405  | 0.034638  |
| C  | -3.301051 | -0.873840 | -0.790025 |
| C  | -4.560735 | -1.315283 | -1.550975 |
| C  | -4.266693 | -1.548540 | -3.038787 |
| C  | -3.629162 | -0.307338 | -3.677622 |
| C  | -2.372255 | 0.142654  | -2.915680 |
| C  | -2.675931 | 0.384266  | -1.427083 |
| C  | 1.507633  | 0.996108  | -3.227190 |
| C  | 2.371967  | 0.857394  | -4.489492 |
| C  | 3.028266  | -0.526862 | -4.576194 |
| C  | 3.832162  | -0.835420 | -3.306331 |
| C  | 2.967404  | -0.703191 | -2.042506 |

|   |           |           |           |
|---|-----------|-----------|-----------|
| C | 2.320043  | 0.693110  | -1.955920 |
| C | 3.428495  | 1.322658  | 0.863776  |
| C | 3.936985  | 2.267551  | 1.964685  |
| C | 4.058871  | 3.711092  | 1.460006  |
| C | 2.729663  | 4.205252  | 0.874535  |
| C | 2.215626  | 3.270514  | -0.232580 |
| C | 2.088396  | 1.822283  | 0.286072  |
| H | -3.734926 | 1.905712  | 0.666902  |
| H | -2.532972 | 1.303483  | 1.824394  |
| H | -1.905452 | 3.629384  | 2.437438  |
| H | -3.647745 | 3.412083  | 2.633660  |
| H | -4.071190 | 4.526203  | 0.447295  |
| H | -3.102734 | 5.586751  | 1.480269  |
| H | -2.202704 | 5.506551  | -0.873914 |
| H | -1.025423 | 4.912722  | 0.301681  |
| H | -1.084137 | 3.389731  | -1.666241 |
| H | -2.835753 | 3.195156  | -1.494370 |
| H | -0.714463 | 2.370816  | 0.548955  |
| H | -2.553943 | -1.683881 | -0.807481 |
| H | -3.536494 | -0.673687 | 0.266126  |
| H | -5.340314 | -0.539194 | -1.450319 |
| H | -4.969183 | -2.229216 | -1.091506 |
| H | -3.577672 | -2.405142 | -3.142130 |
| H | -5.190990 | -1.820047 | -3.573001 |
| H | -4.365368 | 0.516012  | -3.686222 |
| H | -3.371587 | -0.506243 | -4.729903 |
| H | -1.592502 | -0.632516 | -2.993447 |
| H | -1.961961 | 1.063001  | -3.358471 |
| H | -3.437712 | 1.182676  | -1.378876 |
| H | 1.082570  | 2.008973  | -3.157243 |
| H | 0.659147  | 0.294624  | -3.279074 |
| H | 1.755349  | 1.048474  | -5.381887 |
| H | 3.158463  | 1.632858  | -4.480474 |
| H | 3.678458  | -0.585664 | -5.463344 |
| H | 2.244677  | -1.293831 | -4.705919 |
| H | 4.256301  | -1.850594 | -3.356489 |
| H | 4.688480  | -0.140899 | -3.240374 |
| H | 3.571503  | -0.885404 | -1.141210 |
| H | 2.169286  | -1.462033 | -2.056873 |
| H | 3.143003  | 1.427518  | -1.911721 |
| H | 3.293338  | 0.305487  | 1.261202  |
| H | 4.180279  | 1.263348  | 0.059104  |
| H | 3.238016  | 2.237871  | 2.818753  |
| H | 4.907178  | 1.906776  | 2.340454  |
| H | 4.840757  | 3.761060  | 0.681744  |
| H | 4.383901  | 4.374148  | 2.277063  |

|   |          |          |           |
|---|----------|----------|-----------|
| H | 1.977353 | 4.264016 | 1.680601  |
| H | 2.839779 | 5.224751 | 0.473201  |
| H | 2.914449 | 3.303706 | -1.084582 |
| H | 1.238887 | 3.613687 | -0.606568 |
| H | 1.368625 | 1.841778 | 1.119561  |

### GAGVUG<sup>61</sup>

bis(2-Phenyl-2-propoxy)-(bis(trimethylsilyl)amido)-chromium(III)

Charge = 0

Spin Multiplicity = 4

|   |                   |                   |                   |
|---|-------------------|-------------------|-------------------|
| C | 0.58850428953742  | 0.79923024635189  | 4.94799436625447  |
| C | 0.78139890084083  | -0.50584654757419 | 5.74546393693231  |
| H | 0.42210106213621  | -0.36658129472345 | 6.77510859762870  |
| H | 1.84406684262903  | -0.78769275361874 | 5.77451694182703  |
| H | 0.21569984865148  | -1.32627258658488 | 5.28352961666046  |
| C | 1.32256017086972  | 1.94863191105500  | 5.65052337731524  |
| H | 1.19792606732641  | 2.88899377954386  | 5.09588272202746  |
| H | 2.39580465419198  | 1.74054578418205  | 5.76312328413165  |
| H | 0.89297162417353  | 2.08005399098315  | 6.65253929458102  |
| C | 1.05038069256933  | 0.58108380530076  | 3.49851454776141  |
| C | 2.23953904608081  | 1.12690849980552  | 2.99201970795187  |
| H | 2.86618282226753  | 1.75673495550717  | 3.62363171585746  |
| C | 2.64543155730601  | 0.87439261245210  | 1.67611315035204  |
| H | 3.57312223370627  | 1.31434107166534  | 1.30481510313411  |
| C | 1.86907197892098  | 0.06753099644821  | 0.84138479121357  |
| H | 2.18421217670482  | -0.12833466937010 | -0.18506442473878 |
| C | 0.68165355248232  | -0.48492180776230 | 1.33392517694177  |
| H | 0.06356032074708  | -1.11520214150468 | 0.69183261440540  |
| C | 0.28007756237063  | -0.23106374688935 | 2.64675731065204  |
| H | -0.65218213480494 | -0.66313976187659 | 3.01387422656028  |
| C | -1.54606309964503 | 6.08023210700972  | 5.88691891349741  |
| H | -0.54751738994649 | 5.71745586851131  | 6.17149029909245  |
| H | -2.00565469990671 | 6.54085837054930  | 6.77571158986250  |
| H | -1.41916712237050 | 6.87012110986387  | 5.13184030833070  |
| C | -2.85391144837264 | 3.42642579554885  | 6.68100756354294  |
| H | -3.56512392405309 | 2.62452181597155  | 6.42991888295275  |
| H | -3.24869770482422 | 3.95351663732546  | 7.56501644624908  |
| H | -1.89962098970153 | 2.95610674014225  | 6.95773954599997  |
| C | -4.34550884771897 | 5.36551702202228  | 4.84939241231201  |
| H | -4.30287925281411 | 6.11478635533868  | 4.04624745055493  |
| H | -4.77896279893658 | 5.84907982523637  | 5.73942979486000  |
| H | -5.03340446049239 | 4.56705944737400  | 4.53381074190759  |
| N | -1.90301678240672 | 3.85954053178352  | 3.87797862553978  |

|    |                   |                   |                  |
|----|-------------------|-------------------|------------------|
| O  | -0.82329683062698 | 1.09754523286651  | 4.99698912493775 |
| Si | -2.64066178025893 | 4.66514272476248  | 5.27170683364909 |
| Cr | -1.90310415685750 | 2.00005533954943  | 3.87804712470269 |
| C  | -2.25924156471195 | 6.08074624896394  | 1.86947052590992 |
| H  | -3.25785891035012 | 5.71832206309192  | 1.58470574438800 |
| H  | -1.79943215945895 | 6.54148620450336  | 0.98085076444827 |
| H  | -2.38604385340409 | 6.87046440497931  | 2.62474014754313 |
| C  | -0.95223263164339 | 3.42669834618752  | 1.07486132231546 |
| H  | -0.24135680075459 | 2.62444405161726  | 1.32576513559440 |
| H  | -0.55720161809198 | 3.95377120906028  | 0.19095238654870 |
| H  | -1.90667929789997 | 2.95680567776720  | 0.79797100416277 |
| C  | 0.53996508933446  | 5.36491404158870  | 2.90690355131962 |
| H  | 0.49754762085312  | 6.11402452738889  | 3.71020155442414 |
| H  | 0.97363647282100  | 5.84852755862043  | 2.01700351804880 |
| H  | 1.22756746669917  | 4.56614764468482  | 3.22231709412867 |
| Si | -1.16510745011753 | 4.66518877876562  | 2.48439835008713 |
| C  | -4.39488035466861 | 0.79917000883073  | 2.80883810987978 |
| C  | -4.58809349035546 | -0.50560948147149 | 2.01096572402514 |
| H  | -4.22926650973814 | -0.36593489879015 | 0.98121699933129 |
| H  | -5.65076786780041 | -0.78747841021949 | 1.98230589201567 |
| H  | -4.02213469313815 | -1.32616585372285 | 2.47234005866576 |
| C  | -5.12923859493087 | 1.94885383348747  | 2.10710293024041 |
| H  | -5.00430231164567 | 2.88901890624153  | 2.66201104800225 |
| H  | -6.20254145005632 | 1.74082943770760  | 1.99495302378061 |
| H  | -4.70015258902575 | 2.08060051559265  | 1.10491645585411 |
| C  | -4.85599978318762 | 0.58043493096323  | 4.25845878499148 |
| C  | -6.04482982176904 | 1.12615305602174  | 4.76583848302614 |
| H  | -6.67176705842028 | 1.75629848120352  | 4.13484089203563 |
| C  | -6.44999721665345 | 0.87316637833112  | 6.08187498852876 |
| H  | -7.37741478863753 | 1.31308508945348  | 6.45387821189680 |
| C  | -5.67323608956792 | 0.06590582739099  | 6.91584055408338 |
| H  | -5.98780312558004 | -0.13034665687756 | 7.94239202890359 |
| C  | -4.48611556173019 | -0.48641012395367 | 6.42243794252277 |
| H  | -3.86769571605156 | -1.11693744328505 | 7.06397179765509 |
| C  | -4.08525249996165 | -0.23207108273882 | 5.10947604629373 |
| H  | -3.15320765066675 | -0.66402730178370 | 4.74166541135033 |
| O  | -2.98308716946482 | 1.09753476315311  | 2.75934380255710 |

## GANNIU<sup>62</sup>

Tetracarbonyl-((1,1,3,3-tetramethyldisiloxane-1,3-diyl)bis(diphenylphosphine))-chromium

Charge = 0

Spin Multiplicity = 1

|   |          |           |           |
|---|----------|-----------|-----------|
| C | 5.939692 | 10.261805 | 14.811418 |
|---|----------|-----------|-----------|

|   |          |           |           |
|---|----------|-----------|-----------|
| C | 7.295912 | 9.958139  | 14.627952 |
| H | 7.703621 | 9.027924  | 15.017600 |
| C | 8.143917 | 10.847857 | 13.959644 |
| H | 9.197193 | 10.593070 | 13.831451 |
| C | 7.648364 | 12.057596 | 13.469115 |
| H | 8.310363 | 12.753606 | 12.951454 |
| C | 6.298187 | 12.375797 | 13.653547 |
| H | 5.901037 | 13.321534 | 13.280785 |
| C | 5.451548 | 11.486393 | 14.316889 |
| H | 4.404940 | 11.756329 | 14.462407 |
| C | 3.703198 | 10.207135 | 16.601883 |
| C | 4.309682 | 11.163233 | 17.435779 |
| H | 5.396196 | 11.260864 | 17.456494 |
| C | 3.533076 | 12.001758 | 18.237000 |
| H | 4.021304 | 12.740486 | 18.874928 |
| C | 2.137960 | 11.895755 | 18.224822 |
| H | 1.531880 | 12.552975 | 18.850257 |
| C | 1.526439 | 10.942809 | 17.407184 |
| H | 0.439146 | 10.851778 | 17.388239 |
| C | 2.304263 | 10.104453 | 16.601681 |
| H | 1.805151 | 9.367933  | 15.971347 |
| C | 4.799795 | 7.859776  | 12.487716 |
| H | 4.268000 | 7.381632  | 11.650337 |
| H | 5.520105 | 7.139153  | 12.895984 |
| H | 5.360906 | 8.716105  | 12.087439 |
| C | 2.469707 | 9.790738  | 13.012726 |
| H | 1.760648 | 10.218072 | 13.732873 |
| H | 1.893877 | 9.345210  | 12.185813 |
| H | 3.082227 | 10.603254 | 12.598503 |
| C | 1.183304 | 6.581213  | 16.725845 |
| H | 0.271164 | 7.047521  | 16.321847 |
| H | 1.692941 | 7.314933  | 17.363650 |
| H | 0.879449 | 5.732492  | 17.355026 |
| C | 1.351314 | 4.613169  | 14.375689 |
| H | 1.957541 | 4.166607  | 13.577517 |
| H | 0.448675 | 5.049858  | 13.919173 |
| H | 1.030964 | 3.816643  | 15.061090 |
| C | 3.670366 | 4.193372  | 17.522343 |
| C | 3.108811 | 2.964361  | 17.126758 |
| H | 3.089996 | 2.686297  | 16.072373 |
| C | 2.587460 | 2.081393  | 18.073526 |
| H | 2.159328 | 1.132119  | 17.746981 |
| C | 2.614641 | 2.410715  | 19.433334 |
| H | 2.207429 | 1.719984  | 20.173377 |
| C | 3.174521 | 3.624507  | 19.837035 |
| H | 3.211582 | 3.887773  | 20.895356 |

|    |          |          |           |
|----|----------|----------|-----------|
| C  | 3.700852 | 4.507530 | 18.888182 |
| H  | 4.148017 | 5.441074 | 19.222399 |
| C  | 5.094824 | 4.241854 | 15.032945 |
| C  | 6.017040 | 3.292300 | 15.506956 |
| H  | 6.200391 | 3.194478 | 16.578066 |
| C  | 6.701671 | 2.461839 | 14.618037 |
| H  | 7.411825 | 1.728818 | 15.004509 |
| C  | 6.482171 | 2.569561 | 13.240446 |
| H  | 7.017544 | 1.919572 | 12.546673 |
| C  | 5.573990 | 3.515214 | 12.759165 |
| H  | 5.393278 | 3.607215 | 11.686905 |
| C  | 4.885482 | 4.345494 | 13.649667 |
| H  | 4.181978 | 5.077211 | 13.251302 |
| C  | 6.943414 | 8.464254 | 17.619471 |
| C  | 6.928039 | 6.736701 | 15.591139 |
| C  | 6.591819 | 6.025704 | 18.064367 |
| C  | 4.566751 | 7.728467 | 18.352690 |
| Cr | 5.743826 | 7.233805 | 16.968744 |
| O  | 2.538361 | 7.201991 | 14.212133 |
| O  | 7.730293 | 9.188811 | 18.099098 |
| O  | 7.713386 | 6.397501 | 14.799254 |
| O  | 7.200830 | 5.319552 | 18.774770 |
| O  | 3.908016 | 8.064600 | 19.253864 |
| P  | 4.773253 | 9.060579 | 15.620294 |
| P  | 4.280447 | 5.387918 | 16.235487 |
| Si | 3.547244 | 8.446284 | 13.752958 |
| Si | 2.243619 | 5.977189 | 15.302986 |

### GEBXIU<sup>63</sup>

*trans*-Hydrido-(tetrahydroborato-H,H')-bis(1,2-bis(dimethylphosphino)ethane-P,P')-chromium(II)

Charge = 0

Spin Multiplicity = 3

|    |           |           |          |
|----|-----------|-----------|----------|
| Cr | 2.090562  | 10.337677 | 3.229031 |
| P  | 0.497190  | 8.709953  | 3.857618 |
| P  | 0.303180  | 11.802583 | 3.683909 |
| P  | 3.420803  | 11.930787 | 2.101765 |
| P  | 3.556002  | 8.829764  | 2.166716 |
| C  | 0.881774  | 7.355342  | 5.056625 |
| C  | -0.389698 | 7.774581  | 2.528277 |
| C  | -0.960032 | 9.533721  | 4.703372 |
| C  | -0.324126 | 13.079314 | 2.499416 |
| C  | 0.389000  | 12.803940 | 5.240375 |

|   |           |           |           |
|---|-----------|-----------|-----------|
| C | -1.282720 | 10.835332 | 3.970284  |
| C | 4.115369  | 13.419640 | 2.950771  |
| C | 2.779032  | 12.674206 | 0.532397  |
| C | 4.987719  | 11.120026 | 1.464333  |
| C | 4.838175  | 7.992205  | 3.209295  |
| C | 3.001713  | 7.410642  | 1.115398  |
| C | 4.640650  | 9.733061  | 0.925057  |
| H | 1.324367  | 10.241363 | 1.784865  |
| H | -0.649903 | 9.739334  | 5.740405  |
| H | -1.825105 | 8.852953  | 4.742938  |
| H | -1.715397 | 10.625871 | 2.979101  |
| H | -2.006182 | 11.456213 | 4.521154  |
| H | 5.674950  | 11.041805 | 2.321903  |
| H | 5.473110  | 11.752559 | 0.704357  |
| H | 4.061911  | 9.813241  | -0.008847 |
| H | 5.538286  | 9.134176  | 0.706107  |
| H | -0.029033 | 6.815327  | 5.353849  |
| H | 1.358741  | 7.789457  | 5.944941  |
| H | 1.585101  | 6.647160  | 4.597995  |
| H | 0.316988  | 7.135570  | 1.985327  |
| H | -0.823741 | 8.484973  | 1.813067  |
| H | -1.187610 | 7.150338  | 2.956021  |
| H | 0.400138  | 13.900450 | 2.415056  |
| H | -1.284037 | 13.490697 | 2.845260  |
| H | -0.460109 | 12.625382 | 1.509218  |
| H | -0.556066 | 13.336921 | 5.418665  |
| H | 1.208155  | 13.530642 | 5.158123  |
| H | 0.610903  | 12.143641 | 6.088207  |
| H | 4.596750  | 13.104516 | 3.885693  |
| H | 3.301817  | 14.115137 | 3.197655  |
| H | 4.848795  | 13.935895 | 2.314289  |
| H | 3.550238  | 13.290624 | 0.047952  |
| H | 1.901065  | 13.295839 | 0.745372  |
| H | 2.469685  | 11.871208 | -0.148800 |
| H | 4.343670  | 7.306425  | 3.910004  |
| H | 5.376787  | 8.743823  | 3.800028  |
| H | 5.546164  | 7.428690  | 2.584608  |
| H | 2.566422  | 6.624302  | 1.746336  |
| H | 3.849945  | 6.985622  | 0.558496  |
| H | 2.239188  | 7.756927  | 0.405692  |
| B | 3.262803  | 10.482407 | 5.416829  |
| H | 2.855398  | 11.438865 | 4.731663  |
| H | 2.964521  | 9.422677  | 4.841932  |
| H | 2.694365  | 10.517120 | 6.499865  |
| H | 4.481558  | 10.555534 | 5.501669  |

**GEKBIH<sup>64</sup>***cis*-bis( $\eta^4$ -1-(Di-isopropylamino)borole)-dicarbonyl-chromium

Charge = 0

Spin Multiplicity = 1

|    |           |           |           |
|----|-----------|-----------|-----------|
| Cr | 0.334265  | 2.120965  | 6.700304  |
| C  | 1.615419  | 1.204238  | 5.740632  |
| C  | -0.321750 | 0.531982  | 7.378899  |
| O  | 2.499912  | 0.628073  | 5.242546  |
| O  | -0.746695 | -0.504144 | 7.707893  |
| C  | 0.205176  | 3.313773  | 4.696185  |
| C  | -0.742261 | 3.728730  | 5.667205  |
| C  | -1.633678 | 2.649428  | 5.990588  |
| C  | -1.296439 | 1.511293  | 5.198046  |
| B  | -0.270948 | 1.943834  | 4.095487  |
| N  | 0.098501  | 1.322804  | 2.871718  |
| C  | 1.068666  | 1.974940  | 1.959582  |
| C  | 0.407627  | 2.464166  | 0.660362  |
| C  | 2.298335  | 1.101609  | 1.663168  |
| C  | -0.503126 | 0.058715  | 2.377499  |
| C  | -2.019117 | 0.177120  | 2.155667  |
| C  | -0.149024 | -1.146269 | 3.260589  |
| C  | 1.852793  | 1.797375  | 8.359041  |
| C  | 2.046365  | 3.020466  | 7.634486  |
| C  | 0.924368  | 3.877147  | 7.875258  |
| C  | -0.026581 | 3.235233  | 8.714494  |
| B  | 0.640791  | 1.970377  | 9.342282  |
| N  | 0.302447  | 1.199022  | 10.489671 |
| C  | 1.169666  | 0.080658  | 10.929958 |
| C  | 0.427575  | -1.263033 | 11.016525 |
| C  | 1.902412  | 0.394216  | 12.245277 |
| C  | -0.854262 | 1.503715  | 11.367619 |
| C  | -2.199010 | 1.317718  | 10.650435 |
| C  | -0.746541 | 2.889379  | 12.023947 |
| H  | 1.007106  | 3.990640  | 4.396889  |
| H  | -0.812917 | 4.721265  | 6.103572  |
| H  | -2.451831 | 2.710666  | 6.705187  |
| H  | -1.857264 | 0.585691  | 5.323736  |
| H  | 1.424428  | 2.863651  | 2.498874  |
| H  | 0.029339  | 1.626090  | 0.055407  |
| H  | 1.138481  | 3.010850  | 0.045824  |
| H  | -0.432617 | 3.138268  | 0.879184  |
| H  | 2.034069  | 0.201534  | 1.087686  |
| H  | 2.788102  | 0.785709  | 2.593536  |



|   |           |           |           |
|---|-----------|-----------|-----------|
| H | 3.024473  | 1.671299  | 1.064280  |
| H | -0.054044 | -0.128853 | 1.390491  |
| H | -2.551657 | 0.347153  | 3.101724  |
| H | -2.412000 | -0.748164 | 1.707467  |
| H | -2.250792 | 1.012137  | 1.479758  |
| H | -0.578198 | -1.045848 | 4.267245  |
| H | 0.939623  | -1.247981 | 3.364897  |
| H | -0.542973 | -2.072871 | 2.816260  |
| H | 2.586318  | 0.994676  | 8.268176  |
| H | 2.920665  | 3.289709  | 7.045134  |
| H | 0.840032  | 4.881736  | 7.467878  |
| H | -0.975278 | 3.728643  | 8.927228  |
| H | 1.934355  | -0.021919 | 10.147625 |
| H | -0.332912 | -1.262403 | 11.812130 |
| H | 1.140781  | -2.068458 | 11.247207 |
| H | -0.067053 | -1.499617 | 10.065501 |
| H | 1.199818  | 0.503159  | 13.085592 |
| H | 2.481399  | 1.324505  | 12.157372 |
| H | 2.595472  | -0.422167 | 12.498343 |
| H | -0.824555 | 0.765500  | 12.183420 |
| H | -2.308712 | 2.027937  | 9.818852  |
| H | -3.031888 | 1.483219  | 11.350683 |
| H | -2.286296 | 0.301861  | 10.241838 |
| H | -0.786975 | 3.692084  | 11.274578 |
| H | 0.198287  | 2.987058  | 12.576687 |
| H | -1.576338 | 3.042141  | 12.730875 |

## HAGJEG<sup>65</sup>

*trans*-bis(1,3-Di-isopropyl-4,5-dimethyl-2,3-dihydro-1H-imidazol-2-ylidene)-nitrido-diphenyl-chromium(V)

Charge = 0

Spin Multiplicity = 2

|    |                   |                  |                  |
|----|-------------------|------------------|------------------|
| Cr | 0.15872589877950  | 4.49249551793922 | 7.55251341847485 |
| N  | -2.46049882805821 | 6.16137112903200 | 8.13633941031226 |
| N  | -0.80720919179855 | 6.97141480368136 | 9.27999972871557 |
| N  | 2.51564242344838  | 2.67074008241272 | 6.48200364466957 |
| N  | 2.64811590271525  | 2.87081946237879 | 8.63671765521453 |
| N  | -0.54993474547160 | 4.11929254275272 | 6.23135823766361 |
| C  | 1.43365620470036  | 6.07700509206946 | 6.89796551756227 |
| C  | 2.82322661895858  | 6.19125047974556 | 7.12522689543140 |
| H  | 3.33881494322910  | 5.43025110345420 | 7.71738590528558 |
| C  | 3.59975769444973  | 7.24127130512058 | 6.61241193719607 |
| H  | 4.67155712207435  | 7.28094832650823 | 6.82729731114837 |

|   |                   |                   |                   |
|---|-------------------|-------------------|-------------------|
| C | 3.01043685967880  | 8.22812560981791  | 5.81826427394683  |
| H | 3.60881067055048  | 9.04419409547699  | 5.40701380469866  |
| C | 1.63796820128168  | 8.14607424240069  | 5.55430632493266  |
| H | 1.15711449891401  | 8.90284765862149  | 4.92763452393534  |
| C | 0.87846897289824  | 7.09862420681065  | 6.08968092508321  |
| H | -0.19109154605456 | 7.07590483516516  | 5.86327623013978  |
| C | -0.73113976479496 | 3.09622082019593  | 8.90290810960500  |
| C | -1.33799969957733 | 3.39082636323125  | 10.14400680766956 |
| H | -1.36009026331208 | 4.42301630887408  | 10.50453452502505 |
| C | -1.93977589624326 | 2.41501803297161  | 10.95299176221371 |
| H | -2.38797149947070 | 2.70153683556134  | 11.90874865233743 |
| C | -1.97871073694880 | 1.08225164926381  | 10.53568851750391 |
| H | -2.45196813482662 | 0.31749108223334  | 11.15561420085536 |
| C | -1.40367102183017 | 0.74770320586059  | 9.30370543562204  |
| H | -1.42979370811194 | -0.28818982395238 | 8.95321974181959  |
| C | -0.79359787662125 | 1.73453521995634  | 8.51996485660530  |
| H | -0.34837891477355 | 1.43007889631164  | 7.56896250452568  |
| C | 1.89451676176427  | 3.25581782635617  | 7.55680096471687  |
| C | 3.62897568895405  | 1.92379227842445  | 6.88614395197764  |
| C | 3.71362540386814  | 2.04913182362513  | 8.24973724553891  |
| C | 4.54527805612966  | 1.16642757390593  | 5.98116731846881  |
| H | 5.20797367426499  | 0.52776624557078  | 6.57784119736194  |
| H | 5.18151698419709  | 1.83373206629772  | 5.38161177748490  |
| H | 4.00304326340960  | 0.51211999554745  | 5.28646499404167  |
| C | 4.70795778956909  | 1.41448135125640  | 9.16660387297939  |
| H | 5.52817476635526  | 0.98850041182775  | 8.57626883512583  |
| H | 4.26621489696050  | 0.59640926659120  | 9.75513010488997  |
| H | 5.15185057362213  | 2.12841929211906  | 9.87239217662521  |
| C | 2.03193709254150  | 2.83145420431651  | 5.08670674856235  |
| H | 1.21950092799789  | 3.55938671890327  | 5.19377261874765  |
| C | 2.35350803667550  | 3.33283997880867  | 10.01541118374164 |
| H | 1.41584570129270  | 3.89400664437221  | 9.89433016079637  |
| C | -1.12610817528755 | 5.97315298968405  | 8.39416725302638  |
| C | -1.91384688096316 | 7.78299680865717  | 9.55567115523799  |
| C | -2.95831302367125 | 7.27237786537761  | 8.82697985549797  |
| C | -1.92093310734812 | 8.98224680247354  | 10.44760706652619 |
| H | -2.95345995510227 | 9.31977760178964  | 10.59776114259433 |
| H | -1.35576069192842 | 9.82319228725532  | 10.01897552118284 |
| H | -1.50100264121138 | 8.77385094893098  | 11.44081659945121 |
| C | -4.36461205944958 | 7.77643608831994  | 8.77303124692116  |
| H | -4.40058335815138 | 8.80647070119808  | 9.14816380837942  |
| H | -5.04790939107832 | 7.17546006999620  | 9.39154996066134  |
| H | -4.76603317274353 | 7.78762041794976  | 7.75178632246277  |
| C | -3.23918814557810 | 5.27317183796083  | 7.23501872751217  |
| H | -2.54171886330625 | 4.45218240740332  | 7.03614396920720  |
| C | 0.53879614179706  | 7.08849484280628  | 9.89234753123454  |

|   |                   |                  |                   |
|---|-------------------|------------------|-------------------|
| H | 1.12492752129529  | 6.33233645722647 | 9.35151560863079  |
| C | 1.41551351600645  | 1.53960767125372 | 4.54022530893460  |
| H | 0.63457079877536  | 1.16517590957821 | 5.21603029612112  |
| H | 2.15551301673510  | 0.74220756440823 | 4.38471293285670  |
| H | 0.94746641669084  | 1.75056728111529 | 3.56784133980408  |
| C | 3.08877659676389  | 3.43594645043409 | 4.15737047946401  |
| H | 3.54094387537381  | 4.33003656098838 | 4.60806581519020  |
| H | 2.59744820076597  | 3.74073484716437 | 3.22230397722147  |
| H | 3.88504431825125  | 2.72729358532757 | 3.89548605394721  |
| C | 2.05908343181945  | 2.17441540217121 | 10.97190008196796 |
| H | 1.28183280196684  | 1.51969068225559 | 10.55666336513077 |
| H | 1.68750105369838  | 2.58498993265053 | 11.92114247015235 |
| H | 2.95505956759721  | 1.58079496909204 | 11.19505261722708 |
| C | 3.42501727149362  | 4.28900402182820 | 10.55195646756595 |
| H | 3.57700172614287  | 5.13775969929732 | 9.87212178196497  |
| H | 4.39156448625987  | 3.79258451430411 | 10.70782213323796 |
| H | 3.09768587897654  | 4.68226335912540 | 11.52442849368978 |
| C | -4.47845753526018 | 4.67995431141008 | 7.91241330214769  |
| H | -4.22287759229848 | 4.25838195836557 | 8.89430481581101  |
| H | -4.85865294345261 | 3.86207590977811 | 7.28386888746792  |
| H | -5.29301372004119 | 5.40475826808375 | 8.03744221616402  |
| C | -3.54101004701822 | 5.95343362817407 | 5.89665602319045  |
| H | -2.60890770310759 | 6.28649087584218 | 5.42070590443676  |
| H | -4.21121668756934 | 6.81760585036089 | 6.00158279060042  |
| H | -4.02685000018623 | 5.23168758676792 | 5.22449004195444  |
| C | 1.19972932932926  | 8.44164102683756 | 9.61701181598915  |
| H | 1.15767345214660  | 8.68281882535458 | 8.54696757536720  |
| H | 2.25713329786177  | 8.38328628009227 | 9.91007417581034  |
| H | 0.74073867858454  | 9.25611150787384 | 10.19186225682501 |
| C | 0.52722871747077  | 6.72537138189304 | 11.38132452255907 |
| H | 0.10929542987251  | 5.72290289069702 | 11.54477908013600 |
| H | -0.05107199307640 | 7.44028887336892 | 11.98081745125876 |
| H | 1.55806436076701  | 6.73418948525867 | 11.76206474802687 |

## HAJVET<sup>66</sup>

( $\eta^6$ -Cycloheptatriene)-tricarbonyl-chromium

Charge = 0

Spin Multiplicity = 1

|    |           |           |          |
|----|-----------|-----------|----------|
| Cr | 0.783382  | 0.748058  | 5.994157 |
| O  | 1.680765  | -0.199479 | 3.287913 |
| O  | 2.350407  | -1.448591 | 7.328989 |
| O  | -1.459186 | -1.171774 | 5.436827 |
| C  | 1.354818  | 0.197278  | 4.341066 |

|   |           |           |          |
|---|-----------|-----------|----------|
| C | 1.743470  | -0.597322 | 6.806542 |
| C | -0.605615 | -0.407136 | 5.681431 |
| C | 0.528082  | 1.555086  | 8.200294 |
| C | -0.565888 | 1.844967  | 7.395612 |
| C | -0.549795 | 2.541307  | 6.141931 |
| C | 0.576476  | 2.888603  | 5.368773 |
| C | 1.954305  | 2.622079  | 5.664913 |
| C | 2.472315  | 2.154604  | 6.865373 |
| C | 1.812024  | 2.351835  | 8.209963 |
| H | 0.362569  | 0.848881  | 9.015048 |
| H | -1.523806 | 1.396338  | 7.666582 |
| H | -1.519012 | 2.690120  | 5.664008 |
| H | 0.366809  | 3.271460  | 4.369021 |
| H | 2.632313  | 2.678885  | 4.810892 |
| H | 3.510451  | 1.820153  | 6.852477 |
| H | 2.471265  | 1.972567  | 8.999906 |
| H | 1.627162  | 3.419072  | 8.419993 |

### HARZAD<sup>67</sup>

(( $\eta^6$ -2-(3-(diphenylphosphino)-2-methylprop-1-en-1-yl)phenyl)(diphenyl)phosphine)-dicarbonyl-chromium benzene solvate

Charge = 0

Spin Multiplicity = 1

|    |          |          |           |
|----|----------|----------|-----------|
| Cr | 1.931161 | 6.758305 | 9.404353  |
| P  | 3.620469 | 5.557379 | 10.403193 |
| P  | 3.346947 | 9.860998 | 10.980570 |
| O  | 0.311393 | 6.600322 | 11.921926 |
| O  | 0.476015 | 4.244104 | 8.661434  |
| C  | 4.984134 | 6.651653 | 11.070309 |
| H  | 4.507471 | 7.340297 | 11.788442 |
| H  | 5.710278 | 6.041888 | 11.626080 |
| C  | 5.679916 | 7.446978 | 9.995375  |
| C  | 7.180554 | 7.494546 | 10.091125 |
| H  | 7.620468 | 8.095456 | 9.284244  |
| H  | 7.604374 | 6.478108 | 10.046413 |
| H  | 7.493717 | 7.922640 | 11.057511 |
| C  | 5.030435 | 8.098862 | 9.010888  |
| H  | 5.629662 | 8.629428 | 8.263246  |
| C  | 3.568320 | 8.117620 | 8.761498  |
| C  | 3.074763 | 7.430712 | 7.605767  |
| H  | 3.774692 | 6.864801 | 6.993649  |
| C  | 1.697072 | 7.427227 | 7.296107  |
| H  | 1.335746 | 6.843425 | 6.450282  |

|   |           |           |           |
|---|-----------|-----------|-----------|
| C | 0.782091  | 8.139061  | 8.106732  |
| H | -0.284895 | 8.114752  | 7.893145  |
| C | 1.264201  | 8.831868  | 9.241652  |
| H | 0.556558  | 9.353576  | 9.883392  |
| C | 2.659467  | 8.886813  | 9.558328  |
| C | 0.977256  | 6.665100  | 10.952964 |
| C | 1.075340  | 5.219180  | 8.950224  |
| C | 4.597244  | 4.324446  | 9.413013  |
| C | 5.695922  | 3.654658  | 9.980878  |
| H | 5.975424  | 3.837687  | 11.020034 |
| C | 6.434489  | 2.737526  | 9.231340  |
| H | 7.286317  | 2.228225  | 9.685552  |
| C | 6.080580  | 2.467601  | 7.903893  |
| H | 6.656774  | 1.748389  | 7.319330  |
| C | 4.984083  | 3.118305  | 7.334272  |
| H | 4.695729  | 2.907587  | 6.302967  |
| C | 4.248510  | 4.041727  | 8.086401  |
| H | 3.390419  | 4.546754  | 7.641781  |
| C | 3.178041  | 4.535455  | 11.877378 |
| C | 2.638948  | 3.251811  | 11.684692 |
| H | 2.547451  | 2.844209  | 10.676528 |
| C | 2.223458  | 2.482657  | 12.773438 |
| H | 1.810065  | 1.486756  | 12.604450 |
| C | 2.340239  | 2.984094  | 14.074347 |
| H | 2.019201  | 2.381934  | 14.925860 |
| C | 2.870076  | 4.261039  | 14.276021 |
| H | 2.964542  | 4.662252  | 15.286636 |
| C | 3.281901  | 5.033720  | 13.185475 |
| H | 3.685507  | 6.029859  | 13.369307 |
| C | 4.061249  | 11.330984 | 10.109409 |
| C | 3.809225  | 11.672934 | 8.771307  |
| H | 3.134614  | 11.062648 | 8.168993  |
| C | 4.417497  | 12.793969 | 8.196887  |
| H | 4.211710  | 13.045707 | 7.154783  |
| C | 5.280463  | 13.592351 | 8.953567  |
| H | 5.754264  | 14.466736 | 8.504270  |
| C | 5.539533  | 13.260356 | 10.287875 |
| H | 6.217049  | 13.874271 | 10.884046 |
| C | 4.941830  | 12.133260 | 10.856940 |
| H | 5.164559  | 11.870287 | 11.894105 |
| C | 1.819916  | 10.583104 | 11.742290 |
| C | 1.297628  | 9.927015  | 12.870554 |
| H | 1.781018  | 9.020812  | 13.240796 |
| C | 0.165707  | 10.421083 | 13.524675 |
| H | -0.229810 | 9.895632  | 14.395504 |
| C | -0.449454 | 11.591866 | 13.070614 |

|   |           |           |           |
|---|-----------|-----------|-----------|
| H | -1.327124 | 11.985180 | 13.586292 |
| C | 0.069523  | 12.261437 | 11.957260 |
| H | -0.403260 | 13.178393 | 11.600528 |
| C | 1.194574  | 11.759996 | 11.296431 |
| H | 1.590875  | 12.292937 | 10.430753 |

### HAWDUF<sup>68</sup>

(( $\eta^6$ -1,2,3,4,4a,8a)-1-(t-Butyl-dimethylsiloxy)-2,3-diethyl-4-methoxynaphthalene)-dicarbonyl-(triphenylphosphine)-chromium(0)

Charge = 0

Spin Multiplicity = 1

|    |           |           |           |
|----|-----------|-----------|-----------|
| C  | 3.343936  | 14.325626 | 2.646559  |
| O  | 3.805545  | 15.031439 | 1.579520  |
| Si | 3.492931  | 16.530337 | 0.825015  |
| C  | 3.066229  | 16.114332 | -0.960419 |
| H  | 3.793339  | 15.388960 | -1.355170 |
| H  | 3.121925  | 17.017086 | -1.586991 |
| H  | 2.060410  | 15.687598 | -1.077823 |
| C  | 2.101626  | 17.559261 | 1.659984  |
| C  | 2.029355  | 18.905218 | 0.900127  |
| H  | 2.965646  | 19.477620 | 0.976898  |
| H  | 1.798660  | 18.768911 | -0.167404 |
| C  | 2.410219  | 17.845620 | 3.142436  |
| H  | 3.376513  | 18.355151 | 3.275681  |
| H  | 2.420747  | 16.925867 | 3.745401  |
| H  | 1.631984  | 18.505455 | 3.564609  |
| C  | 0.730016  | 16.863816 | 1.556359  |
| H  | 0.448020  | 16.656580 | 0.513407  |
| H  | -0.050495 | 17.516922 | 1.984806  |
| H  | 0.703732  | 15.913266 | 2.107575  |
| C  | 3.995424  | 14.435894 | 3.905241  |
| C  | 5.167032  | 15.394294 | 4.045113  |
| H  | 5.407572  | 15.516592 | 5.107454  |
| H  | 4.820607  | 16.383721 | 3.705395  |
| C  | 6.453687  | 15.034974 | 3.286476  |
| H  | 7.178755  | 15.857235 | 3.380564  |
| H  | 6.258676  | 14.867527 | 2.221045  |
| H  | 6.912761  | 14.127715 | 3.696844  |
| C  | 3.447897  | 13.724844 | 5.035033  |
| C  | 4.051403  | 13.866336 | 6.417964  |
| H  | 5.147194  | 13.847221 | 6.341936  |
| H  | 3.761455  | 12.988150 | 7.008435  |
| C  | 3.613631  | 15.145245 | 7.155961  |

|    |           |           |           |
|----|-----------|-----------|-----------|
| H  | 4.081770  | 15.184256 | 8.149976  |
| H  | 2.524630  | 15.180174 | 7.296027  |
| H  | 3.905242  | 16.053993 | 6.610845  |
| C  | 2.301301  | 12.906970 | 4.864481  |
| O  | 1.748810  | 12.251356 | 5.951040  |
| C  | 0.605932  | 12.925549 | 6.525131  |
| H  | 0.230990  | 12.262806 | 7.313259  |
| H  | -0.183293 | 13.089478 | 5.775339  |
| H  | 0.894614  | 13.892928 | 6.962842  |
| C  | 1.660188  | 12.757042 | 3.583467  |
| C  | 0.497217  | 11.947030 | 3.395517  |
| H  | 0.118390  | 11.379829 | 4.243818  |
| C  | -0.133535 | 11.891208 | 2.173131  |
| H  | -1.029477 | 11.280679 | 2.052646  |
| C  | 0.386512  | 12.603439 | 1.062680  |
| H  | -0.110355 | 12.535638 | 0.094103  |
| C  | 1.529784  | 13.360179 | 1.196500  |
| H  | 1.947187  | 13.889858 | 0.342338  |
| C  | 2.181727  | 13.487224 | 2.458673  |
| Cr | 3.939099  | 12.246417 | 3.400709  |
| C  | 4.862506  | 12.093030 | 1.852426  |
| O  | 5.493748  | 12.079805 | 0.851761  |
| C  | 5.490654  | 11.965703 | 4.274129  |
| O  | 6.510649  | 11.814117 | 4.853076  |
| P  | 3.652541  | 9.919651  | 3.493923  |
| C  | 2.925784  | 9.039944  | 2.021654  |
| C  | 2.861088  | 7.635592  | 1.967787  |
| H  | 3.216525  | 7.038293  | 2.809068  |
| C  | 2.354806  | 6.990422  | 0.838399  |
| H  | 2.312140  | 5.900031  | 0.811318  |
| C  | 1.913704  | 7.738964  | -0.259997 |
| H  | 1.525093  | 7.233916  | -1.146097 |
| C  | 1.980780  | 9.133088  | -0.217923 |
| H  | 1.644771  | 9.723679  | -1.072077 |
| C  | 2.484441  | 9.777969  | 0.918010  |
| H  | 2.542133  | 10.866685 | 0.946578  |
| C  | 2.628340  | 9.284917  | 4.902482  |
| C  | 3.082465  | 9.513400  | 6.213402  |
| H  | 4.032886  | 10.024323 | 6.378124  |
| C  | 2.332296  | 9.095394  | 7.312915  |
| H  | 2.709501  | 9.269867  | 8.322220  |
| C  | 1.096038  | 8.468627  | 7.123152  |
| H  | 0.505650  | 8.146630  | 7.982835  |
| C  | 0.620954  | 8.261697  | 5.825882  |
| H  | -0.345449 | 7.779739  | 5.665810  |
| C  | 1.383849  | 8.662386  | 4.723323  |

|   |          |           |          |
|---|----------|-----------|----------|
| H | 1.002600 | 8.483083  | 3.718002 |
| C | 5.207880 | 8.896196  | 3.652043 |
| C | 5.385604 | 7.894297  | 4.617653 |
| H | 4.604359 | 7.692446  | 5.349705 |
| C | 6.562030 | 7.136189  | 4.655309 |
| H | 6.679213 | 6.364488  | 5.418542 |
| C | 7.576017 | 7.361203  | 3.722437 |
| H | 8.492645 | 6.769570  | 3.751079 |
| C | 7.404860 | 8.351083  | 2.748698 |
| H | 8.187370 | 8.535412  | 2.010328 |
| C | 6.235081 | 9.111952  | 2.716795 |
| H | 6.123565 | 9.877960  | 1.949834 |
| C | 5.129163 | 17.458493 | 0.836831 |
| H | 5.426946 | 17.789689 | 1.841337 |
| H | 5.069347 | 18.346376 | 0.190099 |
| H | 5.927217 | 16.812003 | 0.443103 |
| H | 1.226634 | 19.527687 | 1.332242 |

### JILVAB<sup>69</sup>

Tetracarbonyl-norbornadienyl-chromium(0)

Charge = 0

Spin Multiplicity = 1

|    |           |          |           |
|----|-----------|----------|-----------|
| Cr | 1.750998  | 5.765518 | 7.933556  |
| C  | 2.173835  | 7.558148 | 7.809975  |
| O  | 2.434842  | 8.692928 | 7.730360  |
| C  | 0.707146  | 6.285929 | 9.412529  |
| O  | 0.027703  | 6.678966 | 10.269903 |
| C  | 2.563853  | 5.622279 | 6.239907  |
| O  | 3.012034  | 5.609489 | 5.167486  |
| C  | 0.173703  | 5.890005 | 6.982388  |
| O  | -0.821376 | 5.973165 | 6.378118  |
| C  | 3.834132  | 4.953925 | 8.506825  |
| C  | 3.577254  | 3.474108 | 8.154481  |
| C  | 3.514449  | 2.853088 | 9.576952  |
| C  | 2.455388  | 3.875925 | 10.072067 |
| C  | 3.144798  | 5.200963 | 9.685291  |
| C  | 1.389180  | 3.731369 | 8.966312  |
| C  | 2.078560  | 3.484890 | 7.787874  |
| H  | 4.623177  | 5.567181 | 8.079396  |
| H  | 4.250315  | 3.031790 | 7.415005  |
| H  | 4.468512  | 2.923873 | 10.120385 |
| H  | 3.145940  | 1.816414 | 9.578774  |
| H  | 2.093869  | 3.804482 | 11.101502 |



|   |          |          |           |
|---|----------|----------|-----------|
| H | 3.290430 | 6.044899 | 10.354801 |
| H | 0.329091 | 3.567377 | 9.141730  |
| H | 1.661224 | 3.090280 | 6.864892  |

**KUVGEN<sup>70</sup>**

( $\eta^4$ -Norbornadiene)-(ethoxy(p-tolyl)methylidene)-tricarbonyl-chromium

Charge = 0

Spin Multiplicity = 1

|    |           |           |          |
|----|-----------|-----------|----------|
| Cr | 8.343514  | 8.545205  | 4.849775 |
| C  | 8.389263  | 7.703027  | 6.530613 |
| C  | 8.071632  | 9.621009  | 3.330612 |
| C  | 7.851140  | 10.043775 | 5.799378 |
| O  | 6.094511  | 6.849277  | 5.472634 |
| C  | 6.508027  | 7.862936  | 4.685886 |
| C  | 4.689537  | 6.392762  | 5.520119 |
| C  | 4.501626  | 5.666062  | 6.835195 |
| C  | 5.500362  | 8.331056  | 3.690631 |
| C  | 4.910380  | 9.601712  | 3.777448 |
| C  | 3.998104  | 10.032926 | 2.811158 |
| C  | 3.661401  | 9.228632  | 1.713278 |
| C  | 4.263825  | 7.961565  | 1.623626 |
| C  | 5.154848  | 7.512207  | 2.596426 |
| C  | 2.696144  | 9.702881  | 0.656102 |
| O  | 8.409596  | 7.268648  | 7.611758 |
| O  | 7.935203  | 10.363724 | 2.440866 |
| O  | 7.548267  | 10.998407 | 6.409059 |
| C  | 10.524353 | 8.467150  | 5.383786 |
| C  | 10.816533 | 7.003650  | 4.981022 |
| C  | 9.470321  | 6.576739  | 4.360732 |
| C  | 9.345738  | 7.284553  | 3.176245 |
| C  | 10.613533 | 8.154994  | 3.050730 |
| C  | 10.403966 | 9.185454  | 4.183956 |
| C  | 11.667164 | 7.217586  | 3.700125 |
| H  | 4.032291  | 7.267213  | 5.431543 |
| H  | 4.514414  | 5.729590  | 4.662173 |
| H  | 3.470716  | 5.288228  | 6.895033 |
| H  | 4.673882  | 6.337928  | 7.687034 |
| H  | 5.185787  | 4.810429  | 6.916492 |
| H  | 5.162173  | 10.256160 | 4.613163 |
| H  | 3.543995  | 11.021802 | 2.910788 |
| H  | 4.028976  | 7.312606  | 0.776042 |
| H  | 5.605059  | 6.522325  | 2.496110 |
| H  | 2.271885  | 10.682303 | 0.913526 |

|   |           |           |           |
|---|-----------|-----------|-----------|
| H | 1.864705  | 8.993232  | 0.527467  |
| H | 3.193026  | 9.795538  | -0.322205 |
| H | 10.782784 | 8.893037  | 6.350767  |
| H | 11.209857 | 6.354724  | 5.769056  |
| H | 8.878454  | 5.717916  | 4.668340  |
| H | 8.639872  | 7.086281  | 2.373638  |
| H | 10.818308 | 8.565212  | 2.057532  |
| H | 10.556188 | 10.256034 | 4.069451  |
| H | 11.829991 | 6.290240  | 3.129282  |
| H | 12.625705 | 7.720068  | 3.899148  |

## LIBCRB<sup>71</sup>

tetrakis(bis(*t*-Butyl)-methoxo)-chromium(IV)

Charge = 0

Spin Multiplicity = 3

|    |           |          |          |
|----|-----------|----------|----------|
| Cr | -2.275714 | 4.709011 | 4.528912 |
| O  | -2.373246 | 3.719695 | 6.023211 |
| O  | -3.770996 | 5.697234 | 4.430505 |
| C  | -2.934379 | 2.475678 | 6.482499 |
| C  | -4.306364 | 2.774287 | 7.208207 |
| C  | -4.898777 | 1.548711 | 7.929545 |
| C  | -4.204853 | 3.935085 | 8.216641 |
| C  | -5.317456 | 3.175264 | 6.111830 |
| C  | -1.786783 | 1.668622 | 7.215241 |
| C  | -0.513122 | 1.752560 | 6.350195 |
| C  | -1.443115 | 2.212575 | 8.612487 |
| C  | -2.137740 | 0.166781 | 7.308133 |
| C  | -4.229990 | 6.941337 | 3.869265 |
| C  | -4.954370 | 6.643117 | 2.496491 |
| C  | -3.857050 | 6.242570 | 1.486222 |
| C  | -5.963116 | 5.482456 | 2.596876 |
| C  | -5.675304 | 7.868793 | 1.903844 |
| C  | -4.964237 | 7.747622 | 5.016322 |
| C  | -4.100847 | 7.662943 | 6.290993 |
| C  | -5.056907 | 9.249707 | 4.666305 |
| C  | -6.361813 | 7.202981 | 5.357534 |
| H  | -3.187594 | 1.861720 | 5.596635 |
| H  | -4.319279 | 1.253220 | 8.814436 |
| H  | -5.913171 | 1.802839 | 8.275237 |
| H  | -4.987366 | 0.678794 | 7.262222 |
| H  | -3.653325 | 3.657731 | 9.123465 |
| H  | -3.710957 | 4.806539 | 7.769588 |
| H  | -5.217670 | 4.237188 | 8.524828 |

|   |           |           |          |
|---|-----------|-----------|----------|
| H | -5.486181 | 2.346785  | 5.406773 |
| H | -6.285900 | 3.421703  | 6.573894 |
| H | -4.980009 | 4.051163  | 5.543397 |
| H | -0.699187 | 1.378398  | 5.331987 |
| H | -0.140166 | 2.780080  | 6.274197 |
| H | 0.274549  | 1.125796  | 6.795005 |
| H | -2.248408 | 2.038645  | 9.337939 |
| H | -0.543287 | 1.704782  | 8.993673 |
| H | -1.231315 | 3.290020  | 8.576223 |
| H | -1.247565 | -0.386226 | 7.645017 |
| H | -2.945482 | -0.050297 | 8.014053 |
| H | -2.422985 | -0.236694 | 6.323946 |
| H | -3.344046 | 7.555648  | 3.617310 |
| H | -3.151571 | 7.070987  | 1.318932 |
| H | -4.318238 | 5.997130  | 0.517100 |
| H | -3.289203 | 5.366285  | 1.823469 |
| H | -6.872182 | 5.761756  | 3.143792 |
| H | -6.267350 | 5.177638  | 1.583696 |
| H | -5.518457 | 4.612269  | 3.095132 |
| H | -6.560495 | 8.164142  | 2.482944 |
| H | -5.007917 | 8.738722  | 1.815812 |
| H | -6.020496 | 7.614828  | 0.889242 |
| H | -3.082638 | 8.038109  | 6.106805 |
| H | -4.547159 | 8.288520  | 7.078753 |
| H | -4.024525 | 6.635085  | 6.662917 |
| H | -5.394902 | 9.802156  | 5.556400 |
| H | -4.072327 | 9.653281  | 4.382496 |
| H | -5.761718 | 9.467345  | 3.857752 |
| H | -6.325808 | 6.125153  | 5.567439 |
| H | -7.086243 | 7.378113  | 4.551552 |
| H | -6.744168 | 7.709166  | 6.257765 |
| O | -2.177673 | 3.720121  | 3.034365 |
| O | -0.780966 | 5.697992  | 4.627515 |
| C | -1.616597 | 2.476087  | 2.575034 |
| C | -0.322617 | 6.942077  | 5.189329 |
| C | -0.244206 | 2.774486  | 1.850067 |
| C | -2.764079 | 1.669721  | 1.841409 |
| H | -1.364023 | 1.861780  | 3.460825 |
| C | 0.401563  | 6.643396  | 6.562105 |
| C | 0.411390  | 7.749268  | 4.042720 |
| H | -1.208860 | 7.555872  | 5.441526 |
| C | 0.348218  | 1.548852  | 1.128845 |
| C | -0.345080 | 3.935365  | 0.841704 |
| C | 0.766456  | 3.175106  | 2.946987 |
| C | -4.038072 | 1.753701  | 2.705966 |
| C | -3.106915 | 2.214519  | 0.444283 |

|   |           |           |           |
|---|-----------|-----------|-----------|
| C | -2.413556 | 0.167817  | 1.747958  |
| C | -0.695923 | 6.241795  | 7.571766  |
| C | 1.410773  | 5.483169  | 6.461391  |
| C | 1.121810  | 7.869026  | 7.155717  |
| C | -0.452220 | 7.665479  | 2.768151  |
| C | 0.504003  | 9.251121  | 4.393725  |
| C | 1.808927  | 7.204959  | 3.700813  |
| H | -0.230990 | 1.253602  | 0.243675  |
| H | 1.362816  | 1.802781  | 0.783604  |
| H | 0.436326  | 0.678856  | 1.796119  |
| H | -0.896821 | 3.658383  | -0.065102 |
| H | -0.838450 | 4.807104  | 1.288772  |
| H | 0.667911  | 4.236874  | 0.533499  |
| H | 0.934523  | 2.346520  | 3.652073  |
| H | 1.735218  | 3.421284  | 2.485439  |
| H | 0.428971  | 4.051097  | 3.515257  |
| H | -3.852537 | 1.378947  | 3.724058  |
| H | -4.410675 | 2.781320  | 2.782347  |
| H | -4.825785 | 1.127442  | 2.260521  |
| H | -2.301356 | 2.040663  | -0.280901 |
| H | -4.006790 | 1.707320  | 0.062421  |
| H | -3.318263 | 3.292038  | 0.481069  |
| H | -3.303713 | -0.384748 | 1.410304  |
| H | -1.605474 | -0.049180 | 1.042406  |
| H | -2.128993 | -0.236194 | 2.732124  |
| H | -1.401983 | 7.069702  | 7.739128  |
| H | -0.234969 | 5.996253  | 8.540973  |
| H | -1.263132 | 5.365329  | 7.233935  |
| H | 2.319956  | 5.763179  | 5.915048  |
| H | 1.714711  | 5.177830  | 7.474499  |
| H | 0.966655  | 4.613120  | 5.962407  |
| H | 2.007051  | 8.165059  | 6.577046  |
| H | 0.454051  | 8.738634  | 7.244057  |
| H | 1.466801  | 7.614605  | 8.170273  |
| H | -1.470427 | 8.040427  | 2.952808  |
| H | -0.006105 | 8.291707  | 1.980793  |
| H | -0.528527 | 6.637907  | 2.395453  |
| H | 0.841714  | 9.804170  | 3.503896  |
| H | -0.480533 | 9.654441  | 4.678040  |
| H | 1.209010  | 9.468313  | 5.202217  |
| H | 1.772912  | 6.127275  | 3.490176  |
| H | 2.533535  | 7.379567  | 4.506743  |
| H | 2.191063  | 7.711778  | 2.800844  |

**NIDHAJ<sup>72</sup>**

Nitrido-(N,N'-bis(salicylidene)ethylenediamine)-chromium(V)

Charge = 0

Spin Multiplicity = 2

|    |                   |                   |                   |
|----|-------------------|-------------------|-------------------|
| Cr | 4.52458782409923  | 2.34429436522947  | 0.49279432806952  |
| O  | 6.40980547507858  | 2.44020943664538  | 0.86224235002649  |
| O  | 4.37066795170433  | 1.26645856337063  | 2.08536526114413  |
| N  | 3.85290684994411  | 3.70019459072172  | 0.81230497739790  |
| N  | 4.94203400096939  | 2.56160611726606  | -1.46792950951410 |
| N  | 3.02717203306090  | 1.24155699798147  | -0.30452962922689 |
| C  | 7.31732273177636  | 3.03758835959857  | -1.30596273142704 |
| C  | 7.42013948763348  | 2.82571103605284  | 0.10863305676592  |
| C  | 8.68950883346150  | 3.00809478802200  | 0.71364422716224  |
| C  | 9.79277534984651  | 3.38749006049945  | -0.03760871118351 |
| C  | 9.69172831792751  | 3.59673746606342  | -1.42807721444551 |
| C  | 8.46606053406680  | 3.41510880667880  | -2.04529211246826 |
| C  | 6.08646075898771  | 2.84733593338912  | -2.01370977305511 |
| C  | 3.74097056040166  | 2.41279150778259  | -2.30137581408323 |
| C  | 2.98689131323552  | 1.19556611695065  | -1.77860355433903 |
| C  | 2.11151458790135  | 0.61681221111703  | 0.37697547568746  |
| C  | 2.10914235219161  | 0.45000871578863  | 1.79931813275503  |
| C  | 3.26694739832552  | 0.75430582560774  | 2.59183968831136  |
| C  | 3.22691577586282  | 0.43450624803745  | 3.97270671618032  |
| C  | 2.09192043615910  | -0.12204974048268 | 4.54441619309625  |
| C  | 0.94962987817575  | -0.40930593385257 | 3.76872113470894  |
| C  | 0.97339887730296  | -0.13677564272990 | 2.41209475567857  |
| H  | 8.77139401956843  | 2.84285517719044  | 1.78882097328446  |
| H  | 10.75446549573914 | 3.52500835890151  | 0.46054638769773  |
| H  | 10.56574006863636 | 3.89465950067993  | -2.00698388823805 |
| H  | 8.36276034223210  | 3.56500065658675  | -3.12250860877507 |
| H  | 6.12373563359240  | 2.95584037011101  | -3.10678950740982 |
| H  | 3.12841924055537  | 3.31900803318797  | -2.17703164718787 |
| H  | 4.00008386503225  | 2.29955430585067  | -3.36390168961727 |
| H  | 3.49669955160446  | 0.27642323787082  | -2.10850330932302 |
| H  | 1.95042331298201  | 1.16899382867980  | -2.14492834754509 |
| H  | 1.28449486339171  | 0.15070380759670  | -0.17687853887663 |
| H  | 4.11141245324862  | 0.65053591612314  | 4.57355663685848  |
| H  | 2.08685728130760  | -0.34166983731378 | 5.61384842235072  |
| H  | 0.06563444687430  | -0.84875400483052 | 4.23061096249379  |
| H  | 0.10824109712257  | -0.37029518037231 | 1.78732390704619  |

NEVSAI<sup>73</sup>

Di-isopropylamido-nitrosyl-bis(trimethylsilylmethyl)-chromium(II)

Charge = 0  
Spin Multiplicity = 1

|    |                   |                  |                   |
|----|-------------------|------------------|-------------------|
| Cr | -1.35467688864916 | 6.40261014882658 | 4.44907600590178  |
| Si | -0.50353686621782 | 6.57571559133350 | 7.75149769885870  |
| Si | 1.19048890801217  | 7.24624775546190 | 2.15926344214610  |
| O  | -1.79999889158285 | 9.19393320598146 | 4.70583423144235  |
| N  | -1.60880343245268 | 8.00464229124276 | 4.59469116480475  |
| N  | -2.74472276955442 | 5.83392866460173 | 3.48267158334873  |
| C  | -1.46486134576499 | 5.75128554809306 | 6.35105011405506  |
| C  | 0.42659564171072  | 6.26802339433125 | 3.57542819306912  |
| C  | 1.30054175772528  | 6.93602174748612 | 7.29826532671057  |
| C  | -1.36019185869850 | 8.19080942869354 | 8.23362548698434  |
| C  | -0.49250049798240 | 5.41166212451039 | 9.25219270088396  |
| C  | 3.01210728268762  | 6.74907839172180 | 1.96133316054041  |
| C  | 1.11127254073709  | 9.09977941091296 | 2.51956202865150  |
| C  | 0.30469854111113  | 6.86663887566925 | 0.53146454166844  |
| C  | -3.95919789753630 | 6.45957056665610 | 2.92625897012731  |
| C  | -3.61654233333564 | 7.52361643617285 | 1.87698639378368  |
| C  | -4.85467482387522 | 7.02810558339224 | 4.03622344185586  |
| C  | -2.59377352775761 | 4.36274030009928 | 3.35307161612872  |
| C  | -2.43419056809256 | 3.91784526536779 | 1.89220013084098  |
| C  | -3.70217167425921 | 3.58374631601349 | 4.07621113937003  |
| H  | -1.19211677812722 | 4.67947435100464 | 6.25300916286333  |
| H  | -2.53193403895166 | 5.79239464088406 | 6.63392461075392  |
| H  | 0.98758978605507  | 6.51973617624434 | 4.50384349447314  |
| H  | 0.53191152488243  | 5.17729337845927 | 3.39965677143499  |
| H  | 1.38004803309450  | 7.71108923476895 | 6.52158462363316  |
| H  | 1.81450675768451  | 6.03291644322347 | 6.93463005323821  |
| H  | 1.84705710527454  | 7.29623398446068 | 8.18385223136316  |
| H  | -1.37496562555063 | 8.89941858415113 | 7.39287142177335  |
| H  | -0.84301271650022 | 8.67157779009617 | 9.07834340331761  |
| H  | -2.40231176227649 | 8.00677160544541 | 8.53669392557615  |
| H  | 0.01657840107217  | 4.46488142991380 | 9.01494904935099  |
| H  | -1.51726123442409 | 5.17161219263975 | 9.57425305618059  |
| H  | 0.03215068781220  | 5.87310231791504 | 10.10364997357184 |
| H  | 3.48481431424250  | 7.30665033811448 | 1.13738851104677  |
| H  | 3.10932779164581  | 5.67492163043000 | 1.74062426123256  |
| H  | 3.58220544195338  | 6.95644229240168 | 2.87988354320773  |
| H  | 1.58516606659436  | 9.66977122335322 | 1.70535875707603  |
| H  | 1.64193830136476  | 9.34450336958217 | 3.45230770378442  |
| H  | 0.07387719269961  | 9.44741415611117 | 2.62477505705594  |
| H  | 0.77361618523325  | 7.41549162400188 | -0.29989129608876 |
| H  | -0.75483035435515 | 7.15622289883819 | 0.57576058844044  |
| H  | 0.35500801315080  | 5.79329022770431 | 0.29301149304882  |
| H  | -4.52478967570295 | 5.66150655506046 | 2.41596910106050  |

|   |                   |                  |                  |
|---|-------------------|------------------|------------------|
| H | -3.03810187138388 | 8.34377595749097 | 2.32423328101255 |
| H | -4.54087699455726 | 7.94393525435035 | 1.45382084455256 |
| H | -3.02731675643770 | 7.09133578080371 | 1.05679585765889 |
| H | -4.33881751622708 | 7.83568293052239 | 4.57373362199030 |
| H | -5.12685156858868 | 6.24973745333437 | 4.76175872646304 |
| H | -5.77990076930394 | 7.43507915316088 | 3.60203331621660 |
| H | -1.63833940679085 | 4.11356457131892 | 3.86760983317308 |
| H | -3.35593123510262 | 4.10288792010526 | 1.32115298897470 |
| H | -2.22442042544019 | 2.83951210743788 | 1.84786171955982 |
| H | -1.60992940215432 | 4.45626961281901 | 1.40695296402369 |
| H | -4.67890062228179 | 3.76137254487899 | 3.60335221913884 |
| H | -3.76681469544107 | 3.87481427000193 | 5.13306100740373 |
| H | -3.49637344938674 | 2.50498495240306 | 4.02474675126490 |

### NOHKUQ<sup>74</sup>

tris(Dicyclohexylamido)-chromium(III)

Charge = 0

Spin Multiplicity = 4

|    |                   |                   |                   |
|----|-------------------|-------------------|-------------------|
| Cr | 7.74819527996947  | 4.68695138563842  | 8.21600202888850  |
| N  | 9.55766345310971  | 5.22464870094172  | 8.20579578527413  |
| N  | 7.26686128825351  | 2.91212078727472  | 7.81248198231911  |
| N  | 6.38676457160609  | 5.91686241575354  | 8.62704656656708  |
| C  | 6.77430644262524  | 2.07244203731534  | 8.92075488729284  |
| C  | 7.61668157324847  | 0.80378217022882  | 9.17511342051873  |
| C  | 7.10982828254923  | 0.01809709604335  | 10.39489075656144 |
| C  | 5.62539902015122  | -0.34417072047012 | 10.25407772249590 |
| C  | 4.77387366110209  | 0.90740446567356  | 10.00316428738623 |
| C  | 5.27969572530237  | 1.70494345862330  | 8.79055844264086  |
| C  | 7.28766886821985  | 2.27215666862131  | 6.48568996391776  |
| C  | 6.54129087213717  | 3.10350089007307  | 5.42599121850814  |
| C  | 6.53937555645629  | 2.42118217223451  | 4.04974539404878  |
| C  | 7.96259351679838  | 2.10129695841705  | 3.57273396823927  |
| C  | 8.72487492792518  | 1.27920824143825  | 4.62062572747573  |
| C  | 8.71778955696712  | 1.96609208282701  | 5.99440037436499  |
| C  | 10.11516842206969 | 6.21119699921227  | 7.26364832005033  |
| C  | 10.22196305170856 | 7.62433020461980  | 7.87831811416538  |
| C  | 10.86123773258788 | 8.62410966420600  | 6.90310891085587  |
| C  | 10.07946202493102 | 8.68724097124369  | 5.58399326919404  |
| C  | 9.92953109342963  | 7.29200380688223  | 4.96239927331398  |
| C  | 9.31975579551140  | 6.28581561101539  | 5.95198685827473  |
| C  | 10.56903981936975 | 4.71781411289917  | 9.14900329162302  |
| C  | 11.47889979190442 | 3.63957477812819  | 8.51803818650558  |
| C  | 12.55445553082086 | 3.15033864604925  | 9.49915842507988  |

|   |                   |                   |                   |
|---|-------------------|-------------------|-------------------|
| C | 11.92807223793962 | 2.61659120776157  | 10.79420177476008 |
| C | 9.94071407180560  | 4.16236276570716  | 10.43430610133792 |
| C | 10.99986225993407 | 3.66103113903175  | 11.42890234027358 |
| C | 5.50389379712523  | 6.33857578739539  | 7.52411927281955  |
| C | 4.05994377707348  | 5.80678197141186  | 7.66086957775819  |
| C | 3.18865998040706  | 6.18778479596384  | 6.45378255026490  |
| C | 3.19022453217987  | 7.70303131468989  | 6.21155767796560  |
| C | 4.62138736633399  | 8.23610171543036  | 6.06465394875967  |
| C | 5.49069729305554  | 7.86210093362481  | 7.27538394784991  |
| C | 6.05630315417472  | 6.45532196206267  | 9.95803414477782  |
| C | 7.07629859750811  | 7.50373062762940  | 10.44753187617289 |
| C | 6.71057524288522  | 8.06437695965578  | 11.83046834614537 |
| C | 6.54975651684737  | 6.94745584032905  | 12.86999545128373 |
| C | 5.53918525393352  | 5.89373062435631  | 12.39663266873598 |
| C | 5.90710014503292  | 5.34230383406984  | 11.01082085954828 |
| H | 6.86098239751822  | 2.69314738948943  | 9.83395858942255  |
| H | 7.57898237807964  | 0.15167072050559  | 8.28519665628169  |
| H | 8.67037573156549  | 1.09356515550569  | 9.31218204099118  |
| H | 7.71659854128325  | -0.89063441832372 | 10.53614890034925 |
| H | 7.24739190692535  | 0.63164627473456  | 11.30326759678369 |
| H | 5.50205847409074  | -1.04340917528757 | 9.40775609830183  |
| H | 5.27226526756799  | -0.87230058674559 | 11.15414239847004 |
| H | 3.71770704769086  | 0.62954365986261  | 9.85555163301893  |
| H | 4.80389734171990  | 1.55067611005247  | 10.90076524073799 |
| H | 4.69821466555849  | 2.63151666495888  | 8.66452069961233  |
| H | 5.12830121766187  | 1.10452694614251  | 7.87713552088551  |
| H | 6.75992475048602  | 1.30169948554465  | 6.55586418205592  |
| H | 5.51220660611348  | 3.29130759587332  | 5.76929055232283  |
| H | 7.03181168391097  | 4.09181739840439  | 5.34792252017416  |
| H | 5.96194318871435  | 1.48134783634961  | 4.11628072042116  |
| H | 6.02034965580048  | 3.05552608326602  | 3.31328667104179  |
| H | 7.93148315710047  | 1.56334557922574  | 2.61160613097821  |
| H | 8.50458312704144  | 3.04563286449625  | 3.38726779120531  |
| H | 8.25557527690359  | 0.28249468162606  | 4.70879342962814  |
| H | 9.76222307838420  | 1.10565239728851  | 4.29128143748498  |
| H | 9.27446170412388  | 2.91800926844760  | 5.94469256276644  |
| H | 9.23263950673706  | 1.34290444456667  | 6.74096007672151  |
| H | 11.14417369523794 | 5.89446973556476  | 6.99406781432664  |
| H | 9.20320219205186  | 7.95750797440769  | 8.13918911993017  |
| H | 10.79561365410326 | 7.58419408435600  | 8.81765241794413  |
| H | 10.91432711449323 | 9.62308137339926  | 7.36524099563778  |
| H | 11.90238465912948 | 8.31874005806691  | 6.69454377510008  |
| H | 9.07695229214761  | 9.10726658054125  | 5.77938257259677  |
| H | 10.57437500960901 | 9.36918313638536  | 4.87411508517350  |
| H | 9.31146182879740  | 7.34256009788688  | 4.05186983169944  |
| H | 10.92342081389650 | 6.92843674430990  | 4.64590509398313  |



|   |                   |                  |                   |
|---|-------------------|------------------|-------------------|
| H | 9.27007399958567  | 5.28419520149368 | 5.49647450958702  |
| H | 8.28156645141263  | 6.58726187760742 | 6.18592335082533  |
| H | 11.22471049469832 | 5.56231485779338 | 9.44980063158257  |
| H | 10.83801748541632 | 2.79666741026362 | 8.20744939888581  |
| H | 11.95138064401836 | 4.03465046826862 | 7.60502731882326  |
| H | 13.17428426655214 | 2.37322481991743 | 9.02358409685618  |
| H | 13.23333244132520 | 3.98706560951601 | 9.74434712244515  |
| H | 11.34650111557101 | 1.70537231285368 | 10.56756450446820 |
| H | 12.71261470519953 | 2.31996525897036 | 11.50870236352908 |
| H | 9.31485283790051  | 4.93972906507909 | 10.90101864041813 |
| H | 9.27101496097917  | 3.32476649164262 | 10.16296263892652 |
| H | 10.50649023981054 | 3.24513833375630 | 12.32177203813408 |
| H | 11.60285425851385 | 4.51884207119226 | 11.77611131866702 |
| H | 5.92056280112227  | 5.87341183885530 | 6.60909880048217  |
| H | 4.09787238835002  | 4.71322762310880 | 7.78501005058888  |
| H | 3.60459555690132  | 6.21719070896043 | 8.57895383385547  |
| H | 3.57255744085112  | 5.67754731758200 | 5.55239026266594  |
| H | 2.15926677716294  | 5.82357087873145 | 6.60233031251979  |
| H | 2.59642743490645  | 7.94805847749641 | 5.31641766890286  |
| H | 2.70041145759697  | 8.20690723526705 | 7.06393744458959  |
| H | 5.07266366005550  | 7.81311294737008 | 5.14912835735265  |
| H | 4.61228578444162  | 9.32991981182864 | 5.93142925441982  |
| H | 5.10149094092009  | 8.37526094799040 | 8.17176577074234  |
| H | 6.52551892334767  | 8.21168305248839 | 7.13308859484243  |
| H | 5.07779700211902  | 6.96883710616310 | 9.89535477360905  |
| H | 8.07172325555067  | 7.02703602617756 | 10.48085460160639 |
| H | 7.14397197105933  | 8.31741097550044 | 9.70943226502506  |
| H | 7.47552760024604  | 8.78676999130034 | 12.15839444822708 |
| H | 5.76226723260570  | 8.62663854511546 | 11.75489132618821 |
| H | 7.52825714186821  | 6.46246399463368 | 13.03519758883632 |
| H | 6.23857012794819  | 7.36725473351922 | 13.84005023203157 |
| H | 5.47416325332888  | 5.06921262197066 | 13.12479140023922 |
| H | 4.53385411194728  | 6.35002306121626 | 12.35186215850848 |
| H | 5.15681900002155  | 4.61470295137021 | 10.66440224038191 |
| H | 6.86717218723087  | 4.79798113008838 | 11.08102381117347 |

## RIJQIK<sup>75</sup>

*cis*-Chloro-dicarbonyl-bis(di-isopropylamine)carbyne-bis(trimethylphosphine)-chromium

Charge = 0

Spin Multiplicity = 3

|    |          |          |          |
|----|----------|----------|----------|
| Cr | 0.049393 | 3.222582 | 4.320390 |
| Cl | 1.811881 | 3.686260 | 2.663281 |
| P  | 0.856125 | 0.949271 | 4.759558 |

|   |           |           |          |
|---|-----------|-----------|----------|
| C | 2.400808  | 0.482794  | 3.872465 |
| H | 3.193285  | 1.193888  | 4.137005 |
| H | 2.237240  | 0.547917  | 2.790137 |
| H | 2.706505  | -0.537146 | 4.146216 |
| C | 1.314350  | 0.598509  | 6.509326 |
| H | 0.431754  | 0.704279  | 7.152129 |
| H | 2.075788  | 1.315212  | 6.842540 |
| H | 1.709059  | -0.422850 | 6.604632 |
| C | -0.254809 | -0.479484 | 4.402737 |
| H | -1.198965 | -0.346418 | 4.946522 |
| H | 0.214687  | -1.424333 | 4.711408 |
| H | -0.477713 | -0.526467 | 3.329566 |
| P | -1.138715 | 2.615761  | 2.183718 |
| C | -2.833651 | 1.892371  | 2.283749 |
| H | -2.795775 | 0.927590  | 2.806093 |
| H | -3.258839 | 1.746617  | 1.280349 |
| H | -3.479370 | 2.568963  | 2.858354 |
| C | -0.329917 | 1.487996  | 0.963022 |
| H | -0.252713 | 0.472904  | 1.374008 |
| H | 0.680526  | 1.864031  | 0.759762 |
| H | -0.907228 | 1.448191  | 0.028153 |
| C | -1.446121 | 4.097051  | 1.126438 |
| H | -0.484701 | 4.583622  | 0.918252 |
| H | -2.089292 | 4.805097  | 1.665523 |
| H | -1.930313 | 3.813066  | 0.180849 |
| C | -0.593077 | 4.968201  | 4.316091 |
| O | -0.957641 | 6.078922  | 4.365539 |
| C | 1.197850  | 3.862595  | 5.598025 |
| O | 1.941324  | 4.334778  | 6.378698 |
| C | -1.522726 | 2.769560  | 5.323646 |
| N | -2.347247 | 2.765808  | 6.319327 |
| C | -3.629955 | 1.960764  | 6.198624 |
| H | -3.527215 | 1.475927  | 5.218826 |
| C | -4.852714 | 2.879707  | 6.165594 |
| H | -4.757489 | 3.636054  | 5.374570 |
| H | -5.011561 | 3.392945  | 7.124999 |
| H | -5.749899 | 2.278688  | 5.959444 |
| C | -3.731647 | 0.877954  | 7.273729 |
| H | -2.847046 | 0.226360  | 7.270634 |
| H | -4.613271 | 0.254090  | 7.068875 |
| H | -3.853296 | 1.299782  | 8.281717 |
| C | -2.184416 | 3.512688  | 7.643173 |
| H | -3.125474 | 3.332282  | 8.180107 |
| C | -1.038210 | 2.923356  | 8.461848 |
| H | -1.187888 | 1.852296  | 8.654055 |
| H | -0.978832 | 3.437805  | 9.431875 |

|   |           |          |          |
|---|-----------|----------|----------|
| H | -0.081081 | 3.060214 | 7.942447 |
| C | -2.035556 | 5.016053 | 7.432669 |
| H | -2.848252 | 5.420429 | 6.814825 |
| H | -1.079291 | 5.256478 | 6.953632 |
| H | -2.064116 | 5.518572 | 8.410238 |

### ROPSEU<sup>76</sup>

( $\mu_2$ -Tetrachlorodiphosphido)-decacarbonyl-di-chromium

Charge = 0

Spin Multiplicity = 1

|    |           |           |           |
|----|-----------|-----------|-----------|
| Cr | 1.058927  | 0.538055  | 5.358186  |
| P  | 2.888248  | 0.395608  | 6.743772  |
| Cl | 2.646836  | -0.709227 | 8.493585  |
| Cl | 3.593770  | 2.200402  | 7.509831  |
| C  | -0.519923 | 0.740529  | 4.356997  |
| O  | -1.494846 | 0.876697  | 3.752319  |
| C  | 1.831117  | -0.315975 | 3.837814  |
| O  | 2.222911  | -0.817438 | 2.875276  |
| C  | 0.433992  | -1.155659 | 5.956538  |
| O  | 0.030719  | -2.183473 | 6.292779  |
| C  | 0.160835  | 1.407868  | 6.788089  |
| O  | -0.415452 | 1.937995  | 7.636726  |
| C  | 1.672846  | 2.208094  | 4.687171  |
| O  | 2.021352  | 3.219133  | 4.252746  |
| P  | 4.978102  | -0.452230 | 6.225258  |
| Cr | 6.829100  | -0.539057 | 7.586257  |
| C  | 8.432730  | -0.668624 | 8.559204  |
| O  | 9.423370  | -0.758042 | 9.146796  |
| C  | 6.013101  | 0.155762  | 9.163569  |
| O  | 5.596644  | 0.566499  | 10.158188 |
| C  | 7.300979  | 1.235649  | 7.090812  |
| O  | 7.612341  | 2.313273  | 6.818527  |
| C  | 7.775613  | -1.244444 | 6.096688  |
| O  | 8.381739  | -1.672983 | 5.212251  |
| C  | 6.364432  | -2.291933 | 8.160684  |
| O  | 6.105556  | -3.352177 | 8.536163  |
| Cl | 5.196477  | 0.635549  | 4.460573  |
| Cl | 4.279874  | -2.269873 | 5.485661  |

### TALYIO<sup>77</sup>

( $\eta^6$ -3,4-Dimethylenecyclobutene)-tricarbonyl-chromium(0)

Charge = 0  
Spin Multiplicity = 1

|    |          |          |           |
|----|----------|----------|-----------|
| Cr | 3.674666 | 6.023061 | 7.378274  |
| C  | 3.342951 | 5.529976 | 9.497609  |
| C  | 2.079844 | 5.717986 | 8.863965  |
| C  | 2.322346 | 4.580483 | 7.955135  |
| C  | 3.655247 | 4.382708 | 8.622991  |
| C  | 4.842759 | 4.056989 | 7.984770  |
| C  | 2.070553 | 4.466473 | 6.596298  |
| C  | 4.998370 | 7.169864 | 7.952420  |
| O  | 5.819843 | 7.911816 | 8.326927  |
| C  | 4.478151 | 5.800693 | 5.714369  |
| O  | 4.978589 | 5.645200 | 4.675109  |
| C  | 2.735389 | 7.504337 | 6.812302  |
| O  | 2.143368 | 8.452437 | 6.471691  |
| H  | 3.846355 | 5.990601 | 10.342613 |
| H  | 1.233582 | 6.377272 | 9.033735  |
| H  | 4.841564 | 3.331394 | 7.171209  |
| H  | 5.798884 | 4.258231 | 8.467652  |
| H  | 2.544020 | 3.671639 | 6.019755  |
| H  | 1.192029 | 4.940121 | 6.158594  |

### XUJKAO<sup>78</sup>

( $\eta^5$ -Cyclopentadienyl)-dicarbonyl-(N,N-dimethylaminocarbyne)-chromium

Charge = 0  
Spin Multiplicity = 1

|    |          |          |          |
|----|----------|----------|----------|
| Cr | 4.497651 | 2.686362 | 4.886782 |
| N  | 5.979720 | 2.683842 | 7.545164 |
| O  | 2.554723 | 0.660347 | 5.934623 |
| C  | 6.152032 | 1.970669 | 3.559642 |
| C  | 4.903427 | 1.525822 | 3.033618 |
| C  | 4.130021 | 2.676796 | 2.686694 |
| C  | 5.350807 | 2.691144 | 6.404725 |
| C  | 6.347269 | 1.428019 | 8.222279 |
| C  | 3.314400 | 1.448504 | 5.505515 |
| H  | 6.958088 | 1.334332 | 3.913406 |
| H  | 4.599598 | 0.490729 | 2.905647 |
| H  | 3.134742 | 2.673413 | 2.253227 |
| H  | 7.438527 | 1.382697 | 8.350605 |
| H  | 5.865611 | 1.387511 | 9.210074 |
| H  | 6.012399 | 0.582783 | 7.613284 |
| C  | 6.149646 | 3.396875 | 3.553671 |

|   |          |          |          |
|---|----------|----------|----------|
| C | 4.899598 | 3.833243 | 3.024127 |
| H | 6.953328 | 4.038843 | 3.902662 |
| H | 4.592319 | 4.866240 | 2.887789 |
| C | 6.353776 | 3.930961 | 8.234785 |
| H | 7.445250 | 3.969559 | 8.363431 |
| H | 5.872364 | 3.964216 | 9.222970 |
| H | 6.023156 | 4.784020 | 7.634367 |
| C | 3.306491 | 3.922699 | 5.494657 |
| O | 2.541965 | 4.709704 | 5.916926 |

### YIKSAM<sup>79</sup>

Pentacarbonyl-trichlorophosphine-chromium

Charge = 0

Spin Multiplicity = 1

|    |          |           |           |
|----|----------|-----------|-----------|
| Cr | 4.693202 | 9.048770  | 1.378556  |
| P  | 4.521761 | 11.212521 | 2.112006  |
| Cl | 2.725434 | 11.866385 | 2.916944  |
| Cl | 4.842123 | 12.701164 | 0.701749  |
| Cl | 5.834383 | 11.842569 | 3.591383  |
| C  | 6.421175 | 9.455005  | 0.697884  |
| C  | 5.454130 | 8.487539  | 3.028896  |
| C  | 2.978402 | 8.577561  | 2.053317  |
| C  | 3.895051 | 9.539294  | -0.276414 |
| C  | 4.889306 | 7.297961  | 0.722796  |
| O  | 7.473590 | 9.671248  | 0.274623  |
| O  | 5.904570 | 8.116147  | 4.024370  |
| O  | 1.944906 | 8.262255  | 2.457849  |
| O  | 3.408952 | 9.804142  | -1.289343 |
| O  | 5.014105 | 6.224230  | 0.314244  |

### YIPMAL<sup>80</sup>

1-(Di-t-butylphosphino)-3-ethoxyindene-pentacarbonyl-chromium

Charge = 0

Spin Multiplicity = 1

|    |          |          |           |
|----|----------|----------|-----------|
| Cr | 3.303335 | 3.016421 | 10.572862 |
| C  | 4.014528 | 4.193784 | 11.869544 |
| O  | 4.279380 | 4.935849 | 12.724564 |
| C  | 1.766919 | 3.159449 | 11.577426 |
| O  | 0.792839 | 3.238997 | 12.213537 |
| C  | 2.801864 | 4.556568 | 9.599093  |

|   |          |           |           |
|---|----------|-----------|-----------|
| O | 2.433630 | 5.519451  | 9.065405  |
| C | 3.806777 | 1.523491  | 11.622776 |
| O | 4.036164 | 0.628708  | 12.325617 |
| C | 2.212926 | 1.946637  | 9.459811  |
| O | 1.406787 | 1.346156  | 8.876516  |
| P | 5.424772 | 2.736962  | 9.124545  |
| C | 5.852091 | 0.936515  | 8.552361  |
| C | 4.548712 | 0.192992  | 8.209424  |
| C | 6.754283 | 0.918756  | 7.304597  |
| C | 6.539032 | 0.153163  | 9.687865  |
| C | 6.978466 | 3.508405  | 9.980997  |
| C | 7.073267 | 3.009253  | 11.437331 |
| C | 6.770271 | 5.036259  | 10.003107 |
| C | 8.324833 | 3.185926  | 9.302351  |
| C | 4.178351 | 3.117036  | 5.458192  |
| O | 3.400643 | 2.689875  | 4.436329  |
| C | 2.041822 | 2.315753  | 4.791599  |
| C | 1.322113 | 1.895391  | 3.527730  |
| C | 3.912118 | 3.229635  | 6.787840  |
| C | 5.115590 | 3.776163  | 7.521370  |
| C | 6.116251 | 4.008627  | 6.390867  |
| C | 7.345570 | 4.666012  | 6.349957  |
| C | 8.007830 | 4.823663  | 5.122954  |
| C | 7.441498 | 4.351565  | 3.932940  |
| C | 6.181539 | 3.745224  | 3.945820  |
| C | 5.528611 | 3.593685  | 5.171755  |
| H | 3.913867 | 0.050651  | 9.092037  |
| H | 4.816254 | -0.805941 | 7.828984  |
| H | 3.968867 | 0.703829  | 7.431154  |
| H | 6.985371 | -0.132774 | 7.067915  |
| H | 7.705468 | 1.440742  | 7.452457  |
| H | 6.251866 | 1.351388  | 6.431870  |
| H | 5.960751 | 0.161643  | 10.619925 |
| H | 7.553904 | 0.507776  | 9.900223  |
| H | 6.622539 | -0.897461 | 9.366335  |
| H | 6.173309 | 3.226480  | 12.020609 |
| H | 7.915783 | 3.529461  | 11.920454 |
| H | 7.270825 | 1.933282  | 11.500528 |
| H | 5.805597 | 5.320713  | 10.442690 |
| H | 6.833429 | 5.489683  | 9.006558  |
| H | 7.560644 | 5.488369  | 10.622466 |
| H | 8.338467 | 3.399242  | 8.229816  |
| H | 8.618430 | 2.139435  | 9.447028  |
| H | 9.101844 | 3.807955  | 9.775693  |
| H | 1.554570 | 3.182997  | 5.266744  |
| H | 2.084076 | 1.493535  | 5.524388  |

|   |          |          |          |
|---|----------|----------|----------|
| H | 1.286316 | 2.719638 | 2.802109 |
| H | 0.290298 | 1.609183 | 3.775097 |
| H | 1.816337 | 1.032426 | 3.060603 |
| H | 2.973240 | 2.996023 | 7.274744 |
| H | 4.878599 | 4.755866 | 7.971330 |
| H | 7.802378 | 5.081065 | 7.246275 |
| H | 8.973771 | 5.330468 | 5.099875 |
| H | 7.973273 | 4.482332 | 2.989161 |
| H | 5.705885 | 3.418885 | 3.019987 |

### YIZBOY<sup>81</sup>

Pentacarbonyl-(phosphinoformic acid)-chromium

Charge = 0

Spin Multiplicity = 1

|    |           |          |          |
|----|-----------|----------|----------|
| Cr | 2.077472  | 3.370160 | 4.787846 |
| C  | 0.625402  | 4.299633 | 5.491841 |
| O  | -0.281706 | 4.878815 | 5.928087 |
| C  | 2.792318  | 4.981907 | 4.098478 |
| O  | 3.219536  | 5.975427 | 3.684688 |
| C  | 1.111720  | 3.102989 | 3.179946 |
| O  | 0.505318  | 2.950570 | 2.205025 |
| C  | 1.390053  | 1.745067 | 5.478604 |
| O  | 0.949226  | 0.764239 | 5.907776 |
| C  | 3.029419  | 3.654346 | 6.403342 |
| O  | 3.586766  | 3.846639 | 7.399702 |
| P  | 3.860113  | 2.170258 | 3.801928 |
| H  | 3.576988  | 0.923698 | 3.195732 |
| H  | 4.598391  | 2.776834 | 2.755454 |
| C  | 5.277498  | 1.578088 | 4.892897 |
| O  | 5.307462  | 0.487702 | 5.424101 |
| O  | 6.199362  | 2.549088 | 5.048383 |
| H  | 6.892491  | 2.220028 | 5.667049 |

### YOKXEB<sup>82</sup>

(bis(Diphenylphosphinoxy)-di-t-butylsilane-P,P')-tetracarbonyl-chromium toluene solvate

Charge = 0

Spin Multiplicity = 1

|    |          |          |          |
|----|----------|----------|----------|
| Cr | 1.132844 | 1.502296 | 2.293405 |
| Si | 4.764555 | 2.320350 | 4.127804 |
| C  | 4.911242 | 3.703154 | 5.442951 |

|   |           |           |          |
|---|-----------|-----------|----------|
| C | 5.973192  | 4.749718  | 5.042346 |
| H | 5.789442  | 5.169369  | 4.042691 |
| H | 6.991363  | 4.337503  | 5.059091 |
| H | 5.947432  | 5.586587  | 5.761078 |
| C | 5.280522  | 3.122564  | 6.825679 |
| H | 6.295234  | 2.702083  | 6.842779 |
| H | 4.585872  | 2.335469  | 7.152475 |
| H | 5.246079  | 3.927954  | 7.579032 |
| C | 3.545340  | 4.417409  | 5.552509 |
| H | 3.263178  | 4.913306  | 4.613795 |
| H | 3.606373  | 5.195070  | 6.332754 |
| H | 2.731696  | 3.734486  | 5.833672 |
| C | 6.315820  | 1.301738  | 3.660226 |
| C | 5.901588  | 0.230627  | 2.626480 |
| H | 5.167920  | -0.476937 | 3.036230 |
| H | 6.792281  | -0.350267 | 2.332434 |
| H | 5.478602  | 0.668416  | 1.711698 |
| C | 7.411816  | 2.193634  | 3.037191 |
| H | 7.046853  | 2.777328  | 2.179864 |
| H | 8.236371  | 1.556102  | 2.675261 |
| H | 7.838266  | 2.897732  | 3.764319 |
| C | 6.902392  | 0.584384  | 4.894959 |
| H | 7.728948  | -0.072879 | 4.574992 |
| H | 6.158439  | -0.046055 | 5.402691 |
| H | 7.313257  | 1.289937  | 5.630271 |
| O | 3.595892  | 1.253182  | 4.712954 |
| P | 2.237141  | 0.511030  | 4.154584 |
| C | 2.767231  | -1.257874 | 4.094604 |
| C | 3.600933  | -1.755225 | 5.112650 |
| H | 3.951335  | -1.090105 | 5.903023 |
| C | 3.983505  | -3.096233 | 5.119442 |
| H | 4.635933  | -3.468913 | 5.910751 |
| C | 3.525632  | -3.962838 | 4.119109 |
| H | 3.822619  | -5.012703 | 4.127290 |
| C | 2.685111  | -3.479964 | 3.114260 |
| H | 2.320299  | -4.149161 | 2.333697 |
| C | 2.309535  | -2.131800 | 3.100943 |
| H | 1.653570  | -1.769097 | 2.311190 |
| C | 1.245401  | 0.448382  | 5.712689 |
| C | 1.594106  | 1.193494  | 6.845557 |
| H | 2.486809  | 1.816060  | 6.829036 |
| C | 0.811454  | 1.133897  | 8.003888 |
| H | 1.097894  | 1.720060  | 8.878680 |
| C | -0.328137 | 0.327992  | 8.040849 |
| H | -0.939267 | 0.281742  | 8.943495 |
| C | -0.678738 | -0.425491 | 6.914918 |



|   |           |           |           |
|---|-----------|-----------|-----------|
| H | -1.562357 | -1.065302 | 6.936096  |
| C | 0.101954  | -0.366748 | 5.759601  |
| H | -0.181717 | -0.973424 | 4.899038  |
| O | 4.216263  | 3.021016  | 2.694330  |
| P | 2.814982  | 3.125166  | 1.839245  |
| C | 2.427099  | 4.927558  | 1.969096  |
| C | 3.480695  | 5.858990  | 1.941134  |
| H | 4.513074  | 5.511645  | 1.883635  |
| C | 3.214468  | 7.227322  | 1.986272  |
| H | 4.040466  | 7.940176  | 1.970214  |
| C | 1.892080  | 7.684699  | 2.043892  |
| H | 1.684728  | 8.755455  | 2.075233  |
| C | 0.840517  | 6.766273  | 2.057597  |
| H | -0.192798 | 7.113715  | 2.099587  |
| C | 1.107514  | 5.392939  | 2.023147  |
| H | 0.277269  | 4.688512  | 2.034995  |
| C | 3.490496  | 3.114983  | 0.118475  |
| C | 2.626849  | 3.389712  | -0.954999 |
| H | 1.574958  | 3.614695  | -0.776903 |
| C | 3.106051  | 3.394349  | -2.265826 |
| H | 2.423058  | 3.612077  | -3.088418 |
| C | 4.454645  | 3.123939  | -2.523802 |
| H | 4.827916  | 3.126069  | -3.549004 |
| C | 5.319847  | 2.856130  | -1.461141 |
| H | 6.374534  | 2.649531  | -1.650513 |
| C | 4.840190  | 2.852692  | -0.146685 |
| H | 5.523417  | 2.654298  | 0.677036  |
| C | 2.040941  | 0.435070  | 1.033593  |
| O | 2.560240  | -0.210208 | 0.216107  |
| C | 0.283374  | 2.593550  | 3.573281  |
| O | -0.291241 | 3.237451  | 4.353847  |
| C | -0.206868 | 0.233923  | 2.428823  |
| O | -1.094219 | -0.528383 | 2.421706  |
| C | 0.063843  | 2.219118  | 0.965568  |
| O | -0.692550 | 2.605569  | 0.160777  |

### YUBWAT<sup>83</sup>

Bromo-( $\eta^5$ -cyclopentadienyl)-di-isopropylaminocarbyne-bis(t-butylisocyano)-chromium hexafluorophosphate

Charge = 1

Spin Multiplicity = 3

|    |           |          |           |
|----|-----------|----------|-----------|
| Br | -1.155425 | 0.719114 | 11.867920 |
| Cr | 0.328299  | 3.784775 | 10.983992 |

|   |           |           |           |
|---|-----------|-----------|-----------|
| N | 2.497057  | 5.100819  | 9.270661  |
| N | 2.285394  | 1.681971  | 12.290833 |
| N | -0.911129 | 2.159491  | 8.580626  |
| C | 1.607384  | 4.534313  | 9.983736  |
| C | 3.874335  | 5.486760  | 9.800381  |
| C | 3.877542  | 6.979611  | 10.129826 |
| C | 4.299082  | 4.617634  | 10.972731 |
| C | 2.280321  | 5.404489  | 7.787884  |
| C | 2.691175  | 4.177247  | 6.976070  |
| C | 1.516772  | 2.417084  | 11.802727 |
| C | 2.964917  | 0.569680  | 12.941321 |
| C | 2.280197  | 0.357288  | 14.303229 |
| C | 2.785891  | -0.659915 | 12.033173 |
| C | 4.447177  | 0.935238  | 13.109261 |
| C | -0.462651 | 2.704819  | 9.514572  |
| C | -1.576394 | 1.245019  | 7.660780  |
| C | -0.841955 | -0.103758 | 7.760447  |
| C | -1.488291 | 1.831476  | 6.244036  |
| C | -3.037179 | 1.117218  | 8.127178  |
| C | -1.367124 | 4.080063  | 12.474892 |
| C | -0.154538 | 4.600928  | 13.010036 |
| C | 0.284754  | 5.669964  | 12.171025 |
| C | -0.643749 | 5.785484  | 11.090237 |
| C | -1.650483 | 4.789608  | 11.273555 |
| H | 4.538255  | 5.295895  | 8.944458  |
| H | 4.901860  | 7.281546  | 10.387467 |
| H | 3.550300  | 7.593738  | 9.280520  |
| H | 3.229493  | 7.191712  | 10.991349 |
| H | 5.327604  | 4.887497  | 11.246944 |
| H | 3.660151  | 4.778499  | 11.851116 |
| H | 4.280765  | 3.552768  | 10.709221 |
| H | 2.980778  | 6.227562  | 7.590152  |
| H | 3.714599  | 3.855947  | 7.212051  |
| H | 2.006638  | 3.339026  | 7.165057  |
| H | 2.757003  | -0.494914 | 14.805722 |
| H | 2.390521  | 1.245112  | 14.939994 |
| H | 1.212581  | 0.140900  | 14.166043 |
| H | 3.260838  | -1.523878 | 12.517031 |
| H | 1.719203  | -0.872258 | 11.882892 |
| H | 3.262507  | -0.498762 | 11.057086 |
| H | 4.962940  | 0.102534  | 13.605386 |
| H | 4.924224  | 1.105971  | 12.134965 |
| H | 4.563286  | 1.834547  | 13.728585 |
| H | -1.343929 | -0.824807 | 7.101506  |
| H | 0.203745  | -0.005326 | 7.440153  |
| H | -0.869545 | -0.479200 | 8.791827  |

|   |           |          |           |
|---|-----------|----------|-----------|
| H | -1.989882 | 1.148328 | 5.546045  |
| H | -1.985718 | 2.809062 | 6.190347  |
| H | -0.442785 | 1.942785 | 5.927021  |
| H | -3.555641 | 0.410294 | 7.465695  |
| H | -3.079301 | 0.740827 | 9.157718  |
| H | -3.551886 | 2.085904 | 8.074867  |
| H | -1.929395 | 3.239996 | 12.868355 |
| H | 0.346441  | 4.252890 | 13.908739 |
| H | 1.157502  | 6.293498 | 12.336855 |
| H | -0.602067 | 6.510185 | 10.283633 |
| H | -2.493825 | 4.610917 | 10.612865 |
| C | 0.861646  | 5.874489 | 7.503194  |
| H | 2.652770  | 4.426656 | 5.907012  |
| H | 0.790818  | 6.138668 | 6.439581  |
| H | 0.123734  | 5.088030 | 7.708585  |
| H | 0.607906  | 6.766036 | 8.091493  |

### YUDHOU<sup>84</sup>

*cis*-Tetracarbonyl-(1-trimethylsilyl-2,4,4-triphenyl-4-phospha-1,3-diazabutene-N,P)-chromium

Charge = 0

Spin Multiplicity = 1

|    |           |           |           |
|----|-----------|-----------|-----------|
| Cr | -0.370457 | 2.237126  | 2.966444  |
| P  | -2.555709 | 1.513274  | 3.348779  |
| Si | -0.483848 | 5.678180  | 2.560469  |
| O  | 0.132701  | 2.663950  | 5.944046  |
| O  | 2.505914  | 2.995081  | 2.476055  |
| O  | 0.771062  | -0.520653 | 3.291347  |
| O  | -0.547017 | 1.869324  | -0.055197 |
| N  | -1.473155 | 4.171488  | 2.695556  |
| N  | -3.446218 | 2.955114  | 2.976388  |
| C  | -0.102824 | 2.532189  | 4.811648  |
| C  | 1.366830  | 2.785191  | 2.660064  |
| C  | 0.309652  | 0.553371  | 3.164506  |
| C  | -0.525281 | 2.003768  | 1.102041  |
| C  | -2.774258 | 4.111537  | 2.651540  |
| C  | -3.709957 | 5.197420  | 2.206228  |
| C  | -4.629787 | 5.767203  | 3.098985  |
| C  | -5.531748 | 6.735591  | 2.651399  |
| C  | -5.538309 | 7.120829  | 1.307183  |
| C  | -4.638254 | 6.537264  | 0.409990  |
| C  | -3.724223 | 5.580387  | 0.856606  |
| C  | -3.133908 | 1.080315  | 5.039266  |
| C  | -3.546630 | 2.073803  | 5.939229  |

|   |           |           |           |
|---|-----------|-----------|-----------|
| C | -3.897843 | 1.736173  | 7.249231  |
| C | -3.824852 | 0.406974  | 7.675579  |
| C | -3.401917 | -0.586342 | 6.786073  |
| C | -3.059700 | -0.253461 | 5.473654  |
| C | -3.403959 | 0.239690  | 2.329516  |
| C | -4.796815 | 0.066604  | 2.426711  |
| C | -5.445702 | -0.878086 | 1.631286  |
| C | -4.708864 | -1.675589 | 0.747364  |
| C | -3.323342 | -1.523262 | 0.660709  |
| C | -2.672876 | -0.565618 | 1.445988  |
| C | -1.457502 | 7.294462  | 2.670755  |
| C | 0.688573  | 5.753200  | 4.033294  |
| C | 0.428248  | 5.647144  | 0.914003  |
| H | -4.629371 | 5.468079  | 4.148536  |
| H | -6.232069 | 7.188029  | 3.354995  |
| H | -6.248002 | 7.872290  | 0.957878  |
| H | -4.646634 | 6.826426  | -0.641885 |
| H | -3.025812 | 5.121617  | 0.155023  |
| H | -3.600820 | 3.114815  | 5.618091  |
| H | -4.228029 | 2.515947  | 7.937462  |
| H | -4.096713 | 0.144821  | 8.699242  |
| H | -3.342437 | -1.625863 | 7.112301  |
| H | -2.742332 | -1.040246 | 4.786749  |
| H | -5.382389 | 0.662054  | 3.130431  |
| H | -6.527550 | -0.998021 | 1.707040  |
| H | -5.217022 | -2.418593 | 0.130649  |
| H | -2.743102 | -2.148045 | -0.019758 |
| H | -1.592023 | -0.449739 | 1.371481  |
| H | -0.708411 | 8.100256  | 2.742109  |
| H | -2.091995 | 7.499408  | 1.800265  |
| H | -2.081495 | 7.343641  | 3.574304  |
| H | 1.439109  | 4.955925  | 4.058636  |
| H | 1.219147  | 6.717946  | 3.994151  |
| H | 0.122323  | 5.724759  | 4.976183  |
| H | 1.060310  | 4.758641  | 0.792399  |
| H | -0.282055 | 5.680713  | 0.074592  |
| H | 1.073978  | 6.536263  | 0.842291  |
| H | -4.457967 | 2.960657  | 2.855394  |

## ZAGKIB<sup>85</sup>

Nitrido-tris(di-isopropylamino)-chromium

Charge = 0

Spin Multiplicity = 1

|    |                   |                   |                   |
|----|-------------------|-------------------|-------------------|
| Cr | 1.60047312385121  | 4.11511055944119  | 2.45663958073425  |
| N  | 3.00475447592614  | 4.07859876888245  | 1.82068707595285  |
| N  | 0.74156398822114  | 2.58716499055102  | 1.84239020283106  |
| N  | 1.88699172346628  | 4.10883870164723  | 4.29126429023796  |
| N  | 0.81857255346836  | 5.68341743523967  | 1.83702478434934  |
| C  | -0.45164826350952 | 2.13542861041701  | 2.59159185579744  |
| C  | -0.21532208651598 | 0.80374018641720  | 3.32552024407682  |
| C  | -1.72396295384601 | 2.06579604923440  | 1.72687064404946  |
| C  | 1.17572580777780  | 1.68223590663492  | 0.75304080809846  |
| C  | 2.49996693119711  | 0.96844880661803  | 1.06117977824737  |
| C  | 1.25047454604181  | 2.41547194765827  | -0.59269665797893 |
| C  | 3.15459976276189  | 3.83966681184451  | 5.00996248558748  |
| C  | 3.65439291336354  | 2.41094312732729  | 4.75735450155751  |
| C  | 4.25010577192027  | 4.86764190348930  | 4.69461491463160  |
| C  | 0.76528585528938  | 4.53867751857576  | 5.15520282202903  |
| C  | 1.04177251086448  | 5.88290981215841  | 5.85172300400181  |
| C  | 0.33826364687150  | 3.46629509888131  | 6.17474991657232  |
| C  | 1.48012559771567  | 6.80493610801518  | 1.12958058660711  |
| C  | 2.05313157819165  | 6.39246947142233  | -0.23376300950853 |
| C  | 2.55554582556235  | 7.46982553221858  | 1.99897039636510  |
| C  | -0.65369174293280 | 5.79300649477995  | 1.93367480621060  |
| C  | -1.11673900969461 | 6.99521946237092  | 2.77708231016413  |
| C  | -1.33983784127238 | 5.79447843127681  | 0.55555779965964  |
| H  | -0.63413458860173 | 2.90015105637447  | 3.36621538401503  |
| H  | 0.67780904937458  | 0.86303060001868  | 3.96196817484054  |
| H  | -0.07953063837879 | -0.02584878599879 | 2.61587611062450  |
| H  | -1.08130833119261 | 0.56093305618570  | 3.95947102923040  |
| H  | -1.90979207689489 | 3.01833791534882  | 1.21340906545152  |
| H  | -2.59393730114007 | 1.83929407570465  | 2.36114969341937  |
| H  | -1.65473325712801 | 1.27374612382898  | 0.96712349200567  |
| H  | 0.40248341017881  | 0.90139902622708  | 0.65585108472278  |
| H  | 2.43545661118030  | 0.39872251743064  | 1.99798006378635  |
| H  | 3.31155954377532  | 1.70329449707477  | 1.15707836897838  |
| H  | 2.75215176459160  | 0.27033723055440  | 0.24796053332828  |
| H  | 0.29020824151712  | 2.89223219887439  | -0.83483547517288 |
| H  | 1.50189722096570  | 1.70951657991900  | -1.39922755779626 |
| H  | 2.02239383724102  | 3.19651581729133  | -0.55639563750882 |
| H  | 2.93372293972118  | 3.92091987543234  | 6.08778636580278  |
| H  | 2.88987539764183  | 1.67126204478625  | 5.03439339754991  |
| H  | 4.55991880968895  | 2.21223600441466  | 5.35103474238447  |
| H  | 3.89531864577237  | 2.27414074094561  | 3.69389431122733  |
| H  | 3.91745881119380  | 5.88807280481432  | 4.92910303510975  |
| H  | 4.51102521942522  | 4.82459122268172  | 3.62787721968619  |
| H  | 5.15286141339360  | 4.65313871387775  | 5.28732048884257  |
| H  | -0.09794881091629 | 4.70014306499804  | 4.48682760487492  |
| H  | 1.30903571768176  | 6.65259936991451  | 5.11509042496660  |

|   |                   |                  |                   |
|---|-------------------|------------------|-------------------|
| H | 1.86310053768065  | 5.79926474454066 | 6.57866149983869  |
| H | 0.14742823415831  | 6.21873637223304 | 6.39773304067325  |
| H | 0.10762979835367  | 2.51383538071626 | 5.67865782023269  |
| H | -0.56021427231324 | 3.80113434234301 | 6.71422137407407  |
| H | 1.12254234801841  | 3.28074209123610 | 6.92327602631307  |
| H | 0.70266352890352  | 7.56364089959335 | 0.93597548339638  |
| H | 1.27245347887682  | 5.96591924631962 | -0.87800895690589 |
| H | 2.84121797528864  | 5.63816828185920 | -0.10108469816337 |
| H | 2.48546025637871  | 7.26710150871437 | -0.74394604912970 |
| H | 2.13320552667995  | 7.81945015439131 | 2.95161255729262  |
| H | 2.98974401726673  | 8.33467094800883 | 1.47409005875541  |
| H | 3.35923027840569  | 6.75464724925950 | 2.22190315621037  |
| H | -0.99808107373450 | 4.88458025043708 | 2.45735530904246  |
| H | -0.65772061818281 | 6.97987787192186 | 3.77435073226483  |
| H | -2.20979420727806 | 6.96771981464461 | 2.89947060398054  |
| H | -0.86133754064587 | 7.95065028847963 | 2.29595959711208  |
| H | -1.02865518320773 | 4.92388624707723 | -0.03765744878971 |
| H | -1.09846650004315 | 6.70400324208257 | -0.01418684824886 |
| H | -2.43288992841578 | 5.76061058034065 | 0.67801668140782  |

## References

1. Koide, H.; Hata, T.; Yoshihara, K.; Kamikawa, K.; Uemura, M. *Tetrahedron* **2004**, *60*, 4527–4541.
2. Taylor, I. F.; Griffith, E.; Amma, E. L. *Acta Cryst.* **1976**, *B32*, 653–655.
3. Ganesan, M.; Gabbai, F. P. *Organometallics* **2004**, *23*, 4608–4613.
4. Schubert, U.; Neugebauer, D.; Hofmann, P.; Schilling, B. E.; Fischer, H.; Motsch, A. *Eur. J. Inorg. Chem.* **1981**, *114*, 3349–3365.
5. Dubarle-Offner, J.; Rose-Munch, F.; Dötz, K. H.; Rose, E.; Cuvier, A. S.; Panossian, A. *Organometallics* **2011**, *30*, 6778–6781.
6. Dehmel, F.; Schmalz, H.-G. *Org. Lett.* **2001**, *3*, 3579–3582.
7. Dusausoy, Y.; Protas, J.; Besancon, J.; Tirouflet, J. *C. R. Acad. Sci., Ser. C* **1970**, *270*, 1792–4.
8. Tan, Y.-L.; White, A. J. P.; Widdowson, D. A.; Wilhelm, R.; Williams, D. J. *J. Chem. Soc., Perkin Trans. 1* **2001**, 3269–3280.
9. Monillas, W. H.; Yap, G. P. A.; MacAdams, L. A.; Theopold, K. H. *J. Am. Chem. Soc.* **2007**, *129*, 8090–8091.
10. Gardner, A. P.; Gatehouse, B. M.; White, J. C. B. *Acta Cryst.* **1971**, *B27*, 1505–1509.
11. Hess, J. S.; Leelasubcharoen, S.; Rheingold, A. L.; Doren, D. J.; Theopold, K. H. *J. Am. Chem. Soc.* **2002**, *124*, 2454–2455.
12. Darensbourg, D. J.; Moncada, A. I.; Choi, W.; Reibenspies, J. H. *J. Am. Chem. Soc.* **2008**, *130*, 6523–6533.
13. Teo, S.; Weng, Z.; Hor, T. S. A. *Organometallics* **2008**, *27*, 4188–4192.
14. Rüter, T.; Cavell, K. J.; Braussaud, N. C.; Skelton, B. W.; White, A. H. *J. Chem. Soc., Dalton Trans.* **2002**, 4684–4693.

15. Groysman, S.; Villagrán, D.; Nocera, D. G. *Inorg Chem* **2010**, *49*, 10759–10761.
16. Albrecht, C.; Bode, M.; Pérez, J. M.; Daniels, J.; Schnakenburg, G.; Streubel, R. *Dalton Trans.* **2011**, *40*, 2654–2665.
17. Licciulli, S.; Albahily, K.; Fomitcheva, V.; Korobkov, I.; Gambarotta, S.; Duchateau, R. *Angew. Chem. Int. Ed.* **2011**, *50*, 2346–2349.
18. Liu, B. X.; Xu, D. J. *Acta Cryst.* **2004**, *C60*, 137–139.
19. Liu, Z.; Gao, W.; Liu, X.; Luo, X.; Cui, D.; Mu, Y. *Organometallics* **2011**, *30*, 752–759.
20. Albahily, K.; Shaikh, Y.; Sebastiao, E.; Gambarotta, S.; Korobkov, I.; Gorelsky, S. I. *J. Am. Chem. Soc.* **2011**, *133*, 6388–6395.
21. Doherty, J. C.; Ballem, K. H. D.; Patrick, B. O.; Smith, K. M. *Organometallics* **2004**, *23*, 1487–1489.
22. Rudler, H.; Alvarez, C.; Parlier, A.; Perez, E.; Denise, B.; Xu, Y.; Vaissermann, J. *Tetrahedron Lett.* **2004**, *45*, 2409–2411.
23. Shakir, R.; Atwood, J. L. *Acta Cryst.* **1981**, *37*, 1656–1659.
24. Eremenko, I. L.; Pasynskii, A. A.; Kalinnikov, V. T.; Struchkov, Y. T.; Aleksandrov, G. G. *Inorg. Chim. Acta* **1981**, *52*, 107–111.
25. McGuinness, D. S.; Gibson, V. C.; Wass, D. F.; Steed, J. W. *J. Am. Chem. Soc.* **2003**, *125*, 12716–12717.
26. Conde-Guadano, S.; Danopoulos, A. A.; Pattacini, R.; Hanton, M.; Tooze, R. P. *Organometallics* **2012**, *31*, 1643–1652.
27. Monillas, W. H.; Young, J. F.; Yap, G. P. A.; Theopold, K. H. *Dalton Trans.* **2013**, *42*, 9198–9210.
28. Koch, O.; Edelmann, F.; Behrens, U. *Eur. J. Inorg. Chem.* **1982**, *115*, 1313–1324.
29. Cotton, F. A.; Mott, G. N. *Organometallics* **1982**, *1*, 38–43.
30. Solladié-Cavallo, A.; Suffert, J.; De Cian, A. *J. Organomet. Chem.* **1982**, *236*, 83–93.
31. Lubke, B.; Edelmann, F.; Behrens, U. *Eur. J. Inorg. Chem.* **1983**, *116*, 11–26.
32. Groves, J. T.; Takahashi, T.; Butler, W. M. *Inorg. Chem.* **1983**, *22*, 884–887.
33. Siddall, T. L.; Miyaura, N.; Huffman, J. C.; Kochi, J. K. *J. Chem. Soc., Chem. Commun.* **1983**, 1185–1186.
34. Weber, L.; Boese, R. *Angew. Chem. Int. Ed.* **1983**, *22*, 498–498.
35. Bendix, J.; Birk, T.; Weyhermüller, T. *Dalton Trans.* **2005**, 2737–2741.
36. López-Cortés, J. G.; Contreras de la Cruz, L. F.; Ortega-Alfaro, M. C.; Toscano, R. A.; Alvarez-Toledano, C.; Rudler, H. *J Organomet Chem* **2005**, *690*, 2229–2237.
37. Khan, S. I.; Bau, R. *Organometallics* **1983**, *2*, 1896–1897.
38. Amirthalingam, V.; Grant, D. F.; Senol, A. *Acta Cryst.* **1972**, *B28*, 1340–1345.
39. Wistuba, T.; Limberg, C.; Kircher, P. *Angew. Chem. Int. Ed.* **1999**, *38*, 3037–3039.
40. Herrmann, W. A.; Hubbard, J. L.; Bernal, I.; Korp, J. D.; Haymore, B. L.; Hillhouse, G. L. *Inorg. Chem.* **1984**, *23*, 2978–2983.
41. Bush, M. A.; Sim, G. A. *J. Chem. Soc., A* **1970**, 605.
42. Brown, W. A. C.; McPhail, A. T.; Sim, G. A. *J. Chem. Soc., B* **1966**, 504–519.
43. Kreisel, K. A.; Yap, G. P. A.; Theopold, K. H. *Organometallics* **2006**, *25*, 4670–4679.
44. Legzdins, P.; Wassink, B.; Einstein, F.; Willis, A. C. *J. Am. Chem. Soc.* **1986**, *108*, 317–318.
45. Srinivasan, K.; Kochi, J. K. *Inorg Chem* **1985**, *24*, 4671–4679.
46. Yalpani, M.; Benn, R.; Goddard, R.; Wilke, G. *J. Organomet. Chem.* **1982**, *240*, 49–57.

47. Daly, J. J.; Sanz, F.; Sneed, R. P. A.; Zeiss, H. H. *J. Chem. Soc., Dalton Trans.* **1973**, 73–76.
48. Edelmann, F.; Töfke, S.; Behrens, U. *J. Organomet. Chem.* **1986**, *309*, 87–108.
49. Dötz, K. H.; Kuhn, W.; Müller, G.; Huber, B.; Alt, H. G. *Angew. Chem. Int. Ed.* **1986**, *25*, 812–817.
50. Richeson, D. S.; Hsu, S. W.; Fredd, N. H.; Vanduyne, G.; Theopold, K. H. *J. Am. Chem. Soc.* **1986**, *108*, 8273–8274.
51. Huang, H.; Hughes, R. P.; Rheingold, A. L. *Organometallics* **2010**, *29*, 1948–1955.
52. MacAdams, L. A.; Buffone, G. P.; Incarvito, C. D.; Rheingold, A. L.; Theopold, K. H. *J. Am. Chem. Soc.* **2005**, *127*, 1082–1083.
53. Samuel, R. S.; Patrick, B. O.; Smith, K. M. *Can. J. Chem.* **2004**, *82*, 1788–1790.
54. Szesni, N.; Weibert, B.; Fischer, H. *Inorg. Chim. Acta* **2005**, *358*, 1645–1656.
55. Berno, P.; Ceccon, A.; Gambaro, A.; Venzo, A.; Ganis, P.; Valle, G. *J. Chem. Soc., Perkin Trans. 2* **1987**, 935–941.
56. Ogino, H.; Shoji, M.; Abe, Y.; Shimura, M.; Shimoi, M. *Inorg Chem* **1987**, *26*, 2542–2546.
57. Barlett, R. A.; Dias, H. R.; Flynn, K. M.; Hope, H.; Murray, B. D.; Olmstead, M. M.; Power, P. P. *J. Am. Chem. Soc.* **1987**, *109*, 5693–5698.
58. Birk, T.; Sørensen, H. O.; Bendix, J. *Acta Cryst. C* **2005**, *61*, m231–m233.
59. Gardner, T. G.; Girolami, G. S. *J. Chem. Soc., Chem. Commun.* **1987**, 1758–1760.
60. Rupp, K. B. P.; Feghali, K.; Kovacs, I.; Aparna, K.; Gambarotta, S.; Yap, G. P. A.; Bensimon, C. *J. Chem. Soc., Dalton Trans.* **1998**, 1595–1606.
61. Ballem, K. H.; Shetty, V.; Etkin, N.; Patrick, B. O.; Smith, K. M. *Dalton Trans.* **2004**, 3431–3433.
62. Peulecke, N.; Müller, B. H.; Spannenberg, A.; Rosenthal, U. *Acta Cryst.* **2012**, *E68*, m119–m119.
63. Barron, A. R.; Salt, J. E.; Wilkinson, G.; Motevalli, M.; Hursthouse, M. B. *Polyhedron* **1986**, *5*, 1833–1837.
64. Herberich, G. E.; Hessner, B.; Ohst, H.; Raap, I. A. *J. Organomet. Chem.* **1988**, *348*, 305–316.
65. Wang, J.; Tan, G.; An, D.; Zhu, H.; Yang, Y. *Z. Anorg. Chem.* **2011**, *637*, 1597–1601.
66. Prout, K.; Bannister, C.; Burns, K.; Chen, M.; Warrington, B. H.; Vinter, J. G. *Acta Cryst.* **1994**, *B50*, 71–85.
67. Ogasawara, M.; Wu, W.-Y.; Arae, S.; Watanabe, S.; Morita, T.; Takahashi, T.; Kamikawa, K. *Angew. Chem. Int. Ed.* **2012**, *51*, 2951–2955.
68. Jahr, H. C.; Nieger, M.; Dötz, K. H. *Chem. Eur. J.* **2005**, *11*, 5333–5342.
69. Jones, P. G.; Weinkauff, A. *Acta Cryst.* **1991**, *C47*, 1087–1088.
70. Chen, J.; Wang, B. *J. Organomet. Chem.* **1992**, *440*, 67–78.
71. Bochmann, M.; Wilkinson, G.; Young, G. B.; Hursthouse, M. B.; Malik, K. A. *J. Chem. Soc. Dalton* **1980**, 1863–1871.
72. Azuma, N.; Imori, Y.; Yoshida, H.; Tajima, K.; Li, Y.; Yamauchi, J. *Inorg. Chim. Acta* **1997**, *266*, 29–36.
73. Kuzelka, J.; Legzdins, P.; Rettig, S. J.; Smith, K. M. *Organometallics* **1997**, *16*, 3569–3571.
74. Reardon, D.; Kovacs, I.; Rupp, K. B.; Feghali, K.; Gambarotta, S.; Petersen, J., *Chem. Eur. J.* **1997**, *3*, 1482–1488.



75. Filippou, A. C.; Wossner, D.; KociokKohn, G.; Hinz, I.; Gruber, L. *J. Organomet. Chem.* **1997**, *532*, 207–218.
76. Scheer, M.; Schuster, K.; Krug, A.; Hartung, H. *Chem. Ber.* **1997**, *130*, 1299–1304.
77. Rau, D.; Behrens, U. *Angew. Chem. Int. Ed.* **1991**, *30*, 870–871.
78. Goh, L. Y.; Weng, Z.; Hor, A. T. S.; Leong, W. K. *Organometallics* **2002**, *21*, 4408–4414.
79. Davies, M. S.; Aroney, M. J.; Buys, I. E.; Hambley, T. W.; Calvert, J. L. *Inorg. Chem.* **1995**, *34*, 330–336.
80. Aumann, R.; Jasper, B.; Fröhlich, R. *Organometallics* **1995**, *14*, 231–237.
81. Diemert, K.; Hahn, T.; Kuchen, W.; Mootz, D.; Poll, W.; Tommes, P. *Z. Naturforsch., B: Chem. Sci.* **1995**, *50*, 209–12.
82. Voelker, H.; Freitag, S.; Pieper, U.; Roesky, H. W. *Z. Anorg. Chem.* **1995**, *621*, 694–698.
83. Filippou, A. C.; Lungwitz, B.; Wanninger, K.; Herdtweck, E. *Angew. Chem. Int. Ed. Engl.* **1995**, *34*, 924–927.
84. Wong, W. K.; Jiang, T.; Kwong, D.; Wong, W. T. *Polyhedron* **1995**, *14*, 1695–1697.
85. Odom, A. L.; Cummins, C. C.; Protasiewicz, J. D. *J. Am. Chem. Soc.* **1995**, *117*, 6613–6614.
